# Supplementary material
Source: publisher figshare collection journal article supplement (https://acs.figshare.com/ndownloader/files/25547881)

## Supporting Information

### Synthesis of 2,2'-Dihalobiaryls via Cu-Catalyzed Halogenation of Cyclic Diaryliodonium Salts

Kai Zhu, Zongqiang Song, Yi Wang, and Fengzhi Zhang\*

Email: zhangfengzhi@zjut.edu.cn

#### Contents

|                                                                                       |     |
|---------------------------------------------------------------------------------------|-----|
| 1. General information.....                                                           | S2  |
| 2. Synthesis and characterization of diaryliodonium salts (Typical Procedure A) ..... | S2  |
| 3. Synthesis and characterization of 2a (Typical Procedure B).....                    | S7  |
| 4. Examples of enantioselective halogenative of cyclic diaryliodonium salts .....     | S16 |
| 5. References .....                                                                   | S20 |
| 6. Copies of NMR spectra .....                                                        | S21 |
| 7. Copies of HPLC traces.....                                                         | S51 |

## 1. General information

Nuclear magnetic resonance (NMR) spectra were recorded on a Bruker ADNANCE III 500 MHz instrument. Reference values for residual solvents were taken as  $\delta = 7.26$  ppm ( $\text{CDCl}_3$ ), 2.50 ppm ( $\text{DMSO-d}_6$ ), 3.31 ppm ( $\text{CD}_3\text{OD}$ ) for  $^1\text{H}$  NMR;  $\delta = 77.0$  ppm ( $\text{CDCl}_3$ ),  $\delta = 39.0$  ppm ( $\text{DMSO-d}_6$ ),  $\delta = 48.8$  ppm ( $\text{CD}_3\text{OD}$ ) for  $^{13}\text{C}$  NMR. Signals are abbreviated as follows: s, singlet; d, doublet; t, triplet; q, quartet; m, multiplet, and coupling constants are expressed in hertz. Optical rotations were obtained with Rudolph Autopol V polarimeter (589 nm). HRMS were recorded on Agilent 6210TOF LC/MS mass spectrometer. Reactions were monitored by thin layer chromatography (TLC) using UV light. All reagents were obtained from commercial suppliers and used without further purification. Ligand **L1** – **L6** were purchased from DAICEL CHIRAL TECHNOLOGIES (CHINA) CO. LTD. The cyclic diaryliodoniums with triflate anion were synthesized according to the reported literature.<sup>1-2</sup>

## 2. Synthesis and characterization of diaryliodonium salts (Typical Procedure A)

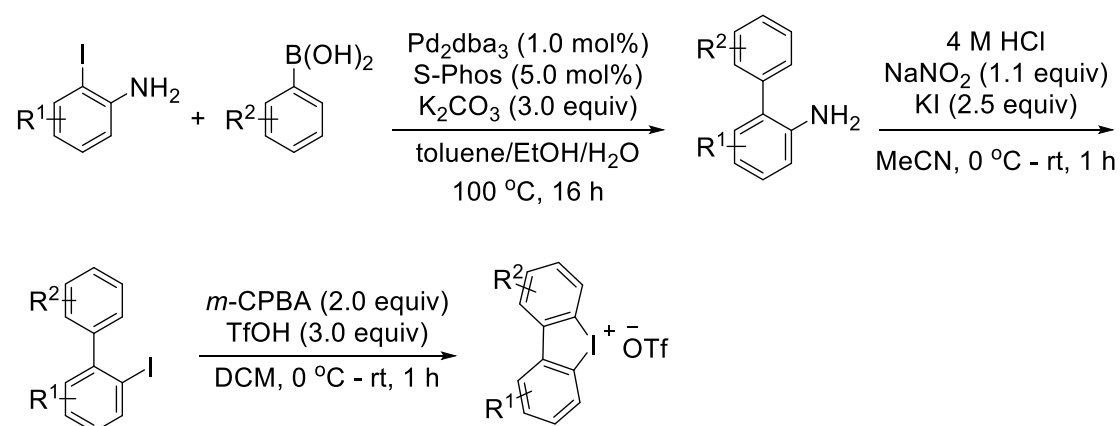

An round-bottomed flask containing a suspension of the appropriate 2-iodo aniline (1.0 equiv), boronic acid (1.5 equiv),  $\text{Pd}_2\text{dba}_3$  (1.0 mol %), *S*-Phos (5.0 mol %) and  $\text{K}_2\text{CO}_3$  (3.0 equiv) in toluene/EtOH/ $\text{H}_2\text{O}$  (8: 2: 2, 0.2 M) was backfilled with  $\text{N}_2$  for 3 times. The reaction was stirred at  $100\text{ }^\circ\text{C}$  in an oil bath for 16 h under  $\text{N}_2$  before being allowed to cool to room temperature. The reaction mixture was filtered and extracted with ethyl acetate, the combined organic layers were washed with  $\text{H}_2\text{O}$  and brine, dried over anhydrous  $\text{Na}_2\text{SO}_4$ , concentrated by rotary evaporation. The crude material was purified by flash chromatography on silica gel to give the product.

To a stirred mixture of 2-aminobiphenyl (1.0 equiv) and 4 M HCl (10.0 equiv) in MeCN (1.0 M) was added an aqueous solution of  $\text{NaNO}_2$  (1 M, 1.1 equiv) dropwise at  $0\text{ }^\circ\text{C}$  and stirred for 45 min. Aqueous KI (2 M, 2.5 equiv) was added dropwise at  $0\text{ }^\circ\text{C}$  and stirred for 5 min at  $0\text{ }^\circ\text{C}$  and 2 h at room temperature. The mixture was extracted with ethyl acetate, and the combined organic layers were washed with  $\text{H}_2\text{O}$ , brine and saturated  $\text{NaHSO}_3$  solution. The organic phase was dried over anhydrous  $\text{Na}_2\text{SO}_4$ , filtrated and concentrated by rotary evaporation. The crude product was purified by flash chromatography on silica gel to give the product.

To a stirred solution of above product in DCM (0.25 M) was added *m*-CPBA (85%, 2.0 equiv) in one portion. After *m*-CPBA being completely dissolved, TfOH (3.0 equiv) was added

dropwise at 0 °C, and was stirred at room temperature for 2 h. DCM was removed by rotary evaporation before the addition of Et<sub>2</sub>O. The mixture was stirred for 30 min, and the solid was collected by filtration. The crude solid was washed with Et<sub>2</sub>O three times, dried under vacuum to afford the appropriate cyclic diaryliodonium salt.

### 3,7-dichloro-1,9-dimethyldibenzo[*b,d*]-cyclic iodonium triflate (**1d**)

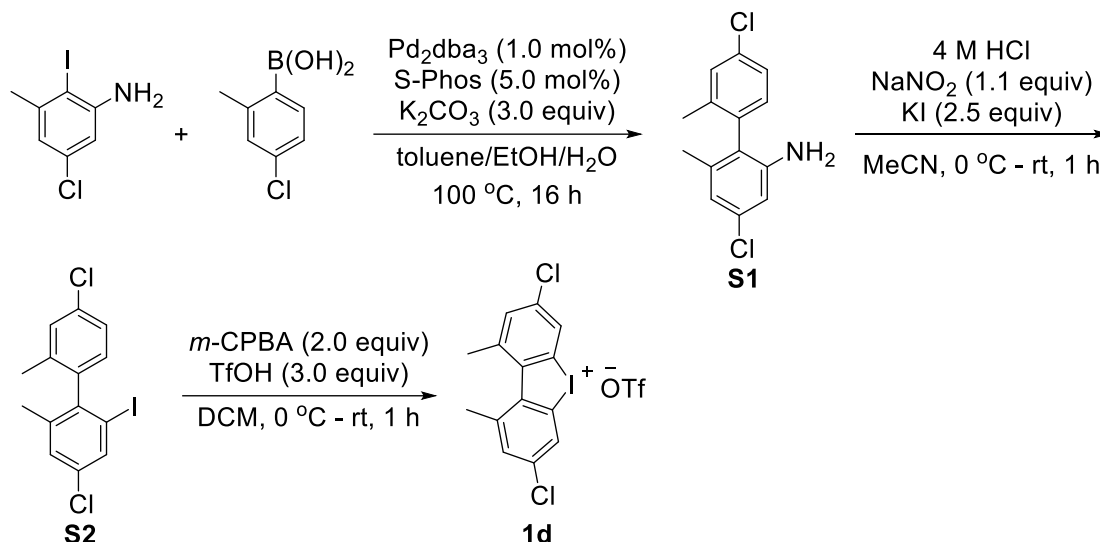

The reaction was performed by following the general procedure **A**. The reaction of 5-chloro-2-iodo-3-methylaniline (2.14 g, 8.0 mmol, 1.0 equiv) and (4-chloro-2-methylphenyl) boronic acid (2.04 g, 12.0 mmol, 1.5 equiv) afforded **S1** (1.91 g, 90%) as yellowish oil, which was purified by column chromatography on silica gel (ethyl acetate/hexanes = 1:40).

The reaction of **S1** (1.91 g, 7.2 mmol) afforded **S2** (2.49 g, 92%) as yellowish oil, which was purified by column chromatography on silica gel (ethyl acetate/hexanes = 1:200).

The reaction of **S2** (2.49 g, 6.6 mmol) afforded **1d** (3.13 g, 90%) as a white solid. Mp = 258.2-259.5 °C; <sup>1</sup>H NMR (500 MHz, DMSO-*d*<sub>6</sub>) δ 8.08 (d, *J* = 2.1 Hz, 2H), 7.83 (d, *J* = 2.1 Hz, 2H), 2.52 (s, 6H); <sup>13</sup>C NMR (126 MHz, DMSO-*d*<sub>6</sub>) δ 141.6, 139.3, 133.8, 133.5, 126.8, 121.8, 23.4. HRMS (ESI) *m/z*: [M-TfO<sup>-</sup>]<sup>+</sup> Calcd for C<sub>14</sub>H<sub>10</sub>Cl<sub>2</sub>I<sup>+</sup> 374.9199; Found 374.9186.

### 3-fluoro-1,9-dimethyldibenzo[*b,d*]-cyclic iodonium triflate (**1f**)

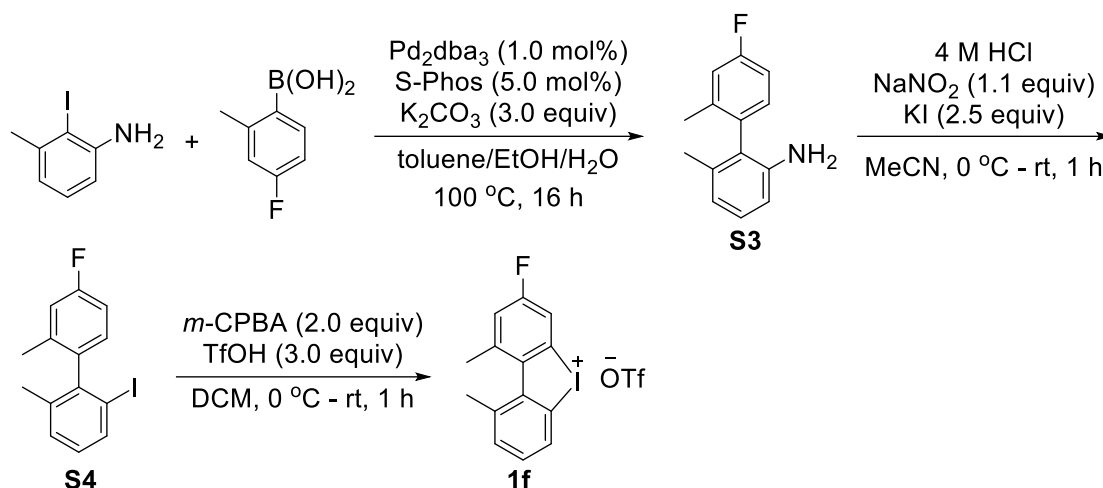

The reaction was performed by following the general procedure **A**. The reaction of 2-iodo-3-methylaniline (1.16 g, 5.0 mmol, 1.0 equiv) and (4-fluoro-2-methylphenyl)boronic acid (1.16 g, 7.5 mmol, 1.5 equiv) afforded **S3** (0.98 g, 91%) as yellowish oil, which was purified by column chromatography on silica gel (ethyl acetate/hexanes = 1:20).

The reaction of **S3** (0.98 g, 4.6 mmol) afforded **S4** (1.36 g, 92%) as yellowish oil, which was purified by column chromatography on silica gel (ethyl acetate/hexanes = 1:200).

The reaction of **S4** (1.36 g, 4.19 mmol) afforded **1f** (1.81 g, 91%) as a white solid. Mp = 185.1–186.1  $^\circ\text{C}$ ;  $^1\text{H}$  NMR (500 MHz,  $\text{DMSO-}d_6$ )  $\delta$  8.07 (dd,  $J = 8.0, 1.2$  Hz, 1H), 7.92 (dd,  $J = 7.1, 2.6$  Hz, 1H), 7.71 (d,  $J = 7.5$  Hz, 1H), 7.67–7.62 (m, 2H), 2.54 (s, 3H), 2.51 (s, 3H);  $^{13}\text{C}$  NMR (126 MHz,  $\text{DMSO-}d_6$ )  $\delta$  161.0 (d,  $J_{\text{C-F}} = 253.2$  Hz), 142.1 (d,  $J_{\text{C-F}} = 8.2$  Hz), 140.0 (d,  $J_{\text{C-F}} = 7.2$  Hz), 138.2 (d,  $J_{\text{C-F}} = 2.9$  Hz), 133.8, 129.7, 127.5, 121.3, 121.2, 121.0 (d,  $J_{\text{C-F}} = 1.6$  Hz), 120.6 (d,  $J_{\text{C-F}} = 21.9$  Hz), 115.1 (d,  $J_{\text{C-F}} = 27.2$  Hz), 23.7, 23.5. HRMS (ESI)  $m/z$ :  $[\text{M-TfO}]^+$  Calcd for  $\text{C}_{14}\text{H}_{11}\text{FI}^+$  324.9884; Found 324.9874.

### 3-chloro-1,9-dimethyldibenzo[*b,d*]-cyclic iodonium triflate (**1g**)

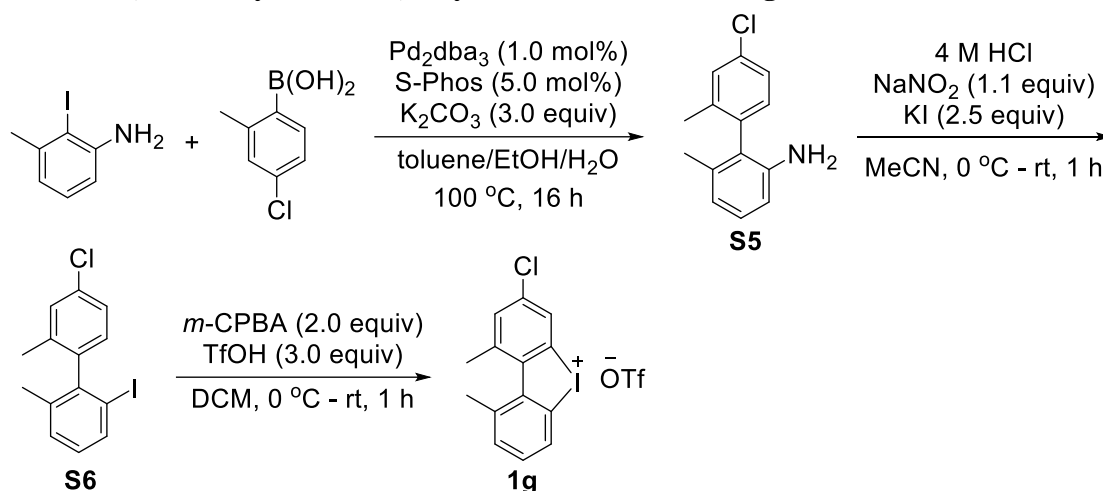

The reaction was performed by following the general procedure **A**. The reaction of 2-iodo-3-methylaniline (1.16 g, 5.0 mmol, 1.0 equiv) and (4-chloro-2-methylphenyl)boronic acid (1.28

g, 7.5 mmol, 1.5 equiv) afforded **S5** (1.06 g, 92%) as yellowish oil, which was purified by column chromatography on silica gel (ethyl acetate/hexanes = 1:20).

The reaction of **S5** (1.06 g, 4.6 mmol) afforded **S6** (1.45 g, 92%) as yellowish oil, which was purified by column chromatography on silica gel (ethyl acetate/hexanes = 1:200).

The reaction of **S6** (1.45 g, 4.23 mmol) afforded **1g** (1.87 g, 90%) as a white solid. Mp = 212.1-212.4 °C; <sup>1</sup>H NMR (500 MHz, CD<sub>3</sub>OD) δ 8.02 (d, *J* = 2.1 Hz, 1H), 8.00 (d, *J* = 7.9 Hz, 1H), 7.78 (d, *J* = 2.0 Hz, 1H), 7.76 (d, *J* = 7.6 Hz, 1H), 7.65 (t, *J* = 7.8 Hz, 1H), 2.62 (s, 6H); <sup>13</sup>C NMR (126 MHz, CD<sub>3</sub>OD) δ 143.4, 142.6, 142.3, 142.0, 136.3, 135.5, 135.2, 131.4, 128.7, 128.3, 120.65, 120.62, 24.2, 24.1. HRMS (ESI) *m/z*: [M-TfO]<sup>+</sup> Calcd for C<sub>14</sub>H<sub>11</sub>ClI 340.9588; Found 340.9578.

### 1-chloro-9-methyldibenzo[*b,d*]-cyclic iodonium triflate (**1j**)

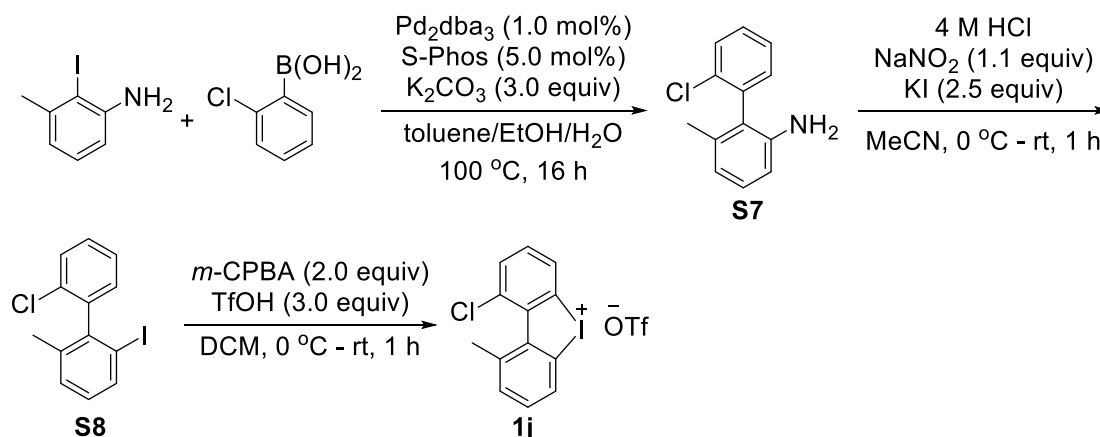

The reaction was performed by following the general procedure **A**. The reaction of 2-iodo-3-methylaniline (1.16 g, 5.0 mmol, 1.0 equiv) and (2-chlorophenyl)boronic acid (1.17 g, 7.5 mmol, 1.5 equiv) afforded **S7** (0.98 g, 90%) as yellowish oil, which was purified by column chromatography on silica gel (ethyl acetate/hexanes = 1:20).

The reaction of **S7** (0.98 g, 4.5 mmol) afforded **S8** (1.33 g, 90%) as yellowish oil, which was purified by column chromatography on silica gel (ethyl acetate/hexanes = 1:200).

The reaction of **S8** (1.33 g, 4.05 mmol) afforded **1j** (1.75 g, 91%) as a white solid. Mp = 194.4-195.1 °C; <sup>1</sup>H NMR (500 MHz, DMSO-*d*<sub>6</sub>) δ 8.24 (dd, *J* = 8.1, 1.1 Hz, 1H), 8.09 (dd, *J* = 7.8, 1.3 Hz, 1H), 7.96 (dd, *J* = 8.0, 1.0 Hz, 1H), 7.76 – 7.67 (m, 3H), 2.64 (s, 3H); <sup>13</sup>C NMR (126 MHz, DMSO-*d*<sub>6</sub>) δ 141.2, 140.0, 139.1, 133.9, 133.3, 132.9, 131.2, 130.6, 129.2, 127.4, 121.7, 121.1, 24.7. HRMS (ESI) *m/z*: [M-TfO]<sup>+</sup> Calcd for C<sub>13</sub>H<sub>9</sub>ClI 326.9432; Found 326.9423.

### 1,3-dichloro-9-methyldibenzo[*b,d*]-cyclic iodonium triflate (**1k**)

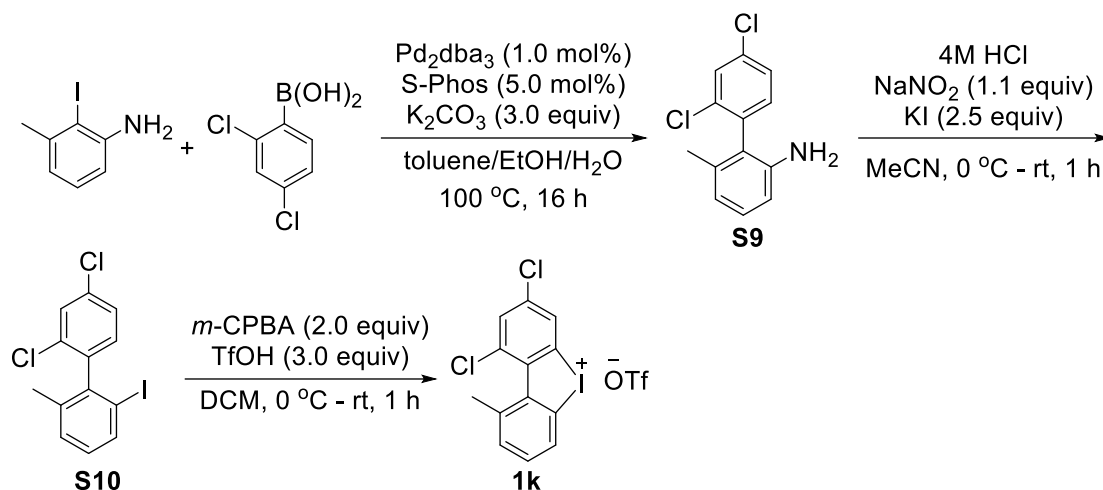

The reaction was performed by following the general procedure **A**. The reaction of 2-iodo-3-methylaniline (1.16 g, 5.0 mmol, 1.0 equiv) and (2,4-dichlorophenyl)boronic acid (1.42 g, 7.5 mmol, 1.5 equiv) afforded **S9** (1.1 g, 88%) as yellowish oil, which was purified by column chromatography on silica gel (ethyl acetate/hexanes = 1:20).

The reaction of **S9** (1.1 g, 4.4 mmol) afforded **S10** (1.39 g, 87%) as yellowish oil, which was purified by column chromatography on silica gel (ethyl acetate/hexanes = 1:200).

The reaction of **S10** (1.39 g, 3.83 mmol) afforded **1k** (1.74 g, 89%) as a white solid. Mp = 219.4–220.1 °C;  $^1\text{H}$  NMR (500 MHz, DMSO- $d_6$ )  $\delta$  8.24 (d,  $J$  = 1.9 Hz, 1H), 8.18 (d,  $J$  = 2.0 Hz, 1H), 8.08 (dd,  $J$  = 7.8, 1.5 Hz, 1H), 7.78 – 7.69 (m, 2H), 2.63 (s, 3H);  $^{13}\text{C}$  NMR (126 MHz, DMSO- $d_6$ )  $\delta$  141.8, 140.0, 138.7, 134.7, 134.5, 134.2, 132.9, 131.3, 129.0, 127.8, 123.0, 121.9, 25.2. HRMS (ESI)  $m/z$ :  $[\text{M-TfO}]^+$  Calcd for  $\text{C}_{13}\text{H}_8\text{Cl}_2\text{I}$  360.9042; Found 360.9044.

### 1,3-dichloro-9-methyldibenzo[*b,d*]-cyclic iodonium triflate (**1l**)

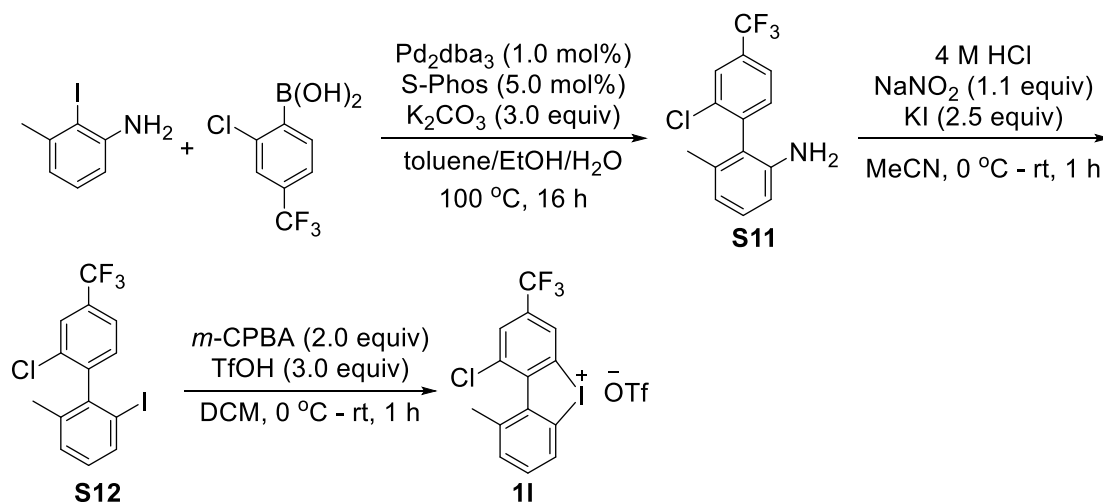

The reaction was performed by following the general procedure **A**. The reaction of 2-iodo-3-methylaniline (1.16 g, 5.0 mmol, 1.0 equiv) and (2-chloro-4-(trifluoromethyl)phenyl)boronic acid (1.68 g, 7.5 mmol, 1.5 equiv) afforded **S11** (1.25 g, 88%) as yellowish oil, which was purified by column chromatography on silica gel (ethyl acetate/hexanes = 1:20).

The reaction of **S11** (1.25 g, 4.4 mmol) afforded **S12** (1.52 g, 87%) as yellowish oil, which was purified by column chromatography on silica gel (ethyl acetate/hexanes = 1:200).

The reaction of **S12** (1.52 g, 3.83 mmol) afforded **11** (1.83 g, 88%) as a white solid. Mp = 233.2-234.5 °C; <sup>1</sup>H NMR (500 MHz, DMSO-*d*<sub>6</sub>) δ 8.54 (d, *J* = 1.7 Hz, 1H), 8.43 (d, *J* = 1.7 Hz, 1H), 8.13 (dd, *J* = 7.2, 2.0 Hz, 1H), 7.85 – 7.74 (m, 2H), 2.67 (s, 3H); <sup>13</sup>C NMR (126 MHz, DMSO-*d*<sub>6</sub>) δ 144.1, 142.1, 137.9, 134.1, 133.9, 131.5, 130.0 (q, *J*<sub>C-F</sub> = 34.8 Hz), 129.7 (q, *J*<sub>C-F</sub> = 4.4 Hz), 127.5, 125.5 (q, *J*<sub>C-F</sub> = 4.4 Hz), 122.8, 122.6 (q, *J*<sub>C-F</sub> = 273.2 Hz), 122.2, 24.7. HRMS (ESI) *m/z*: [M-TfO]<sup>+</sup> Calcd for C<sub>14</sub>H<sub>8</sub>F<sub>3</sub>ClI 394.9305; Found 394.9291.

### 3. Synthesis and characterization of **2a** (Typical Procedure B)

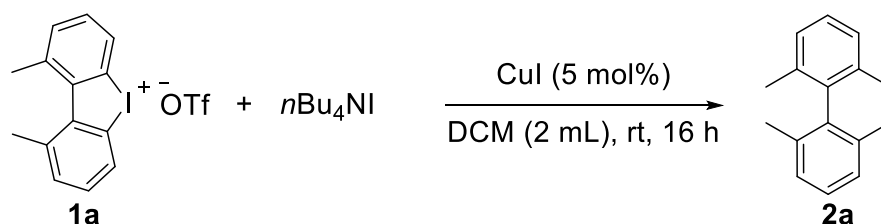

To the stirred solution of cyclic diaryliodonium salts **1a** (91.2 mg, 0.2 mmol), CuI (1.9 mg, 5 mol%) in DCM (2 mL) was added *n*Bu<sub>4</sub>NI (88.6 mg, 0.24 mmol). The reaction mixture was stirred at room temperature for 16 h. Then the solvent was concentrated in vacuo. The residue was purified by column chromatography (PE/EtOAc = 200:1) on silica gel to obtain the desired product **2a** (85.9 mg, 99%) as a white solid. Mp = 68.1-69.0 °C; <sup>1</sup>H NMR (500 MHz, CDCl<sub>3</sub>) δ 7.85 – 7.81 (m, 2H), 7.30 (dt, *J* = 7.6, 0.9 Hz, 2H), 7.03 (t, *J* = 7.7 Hz, 2H), 2.04 (s, 6H) ppm. <sup>13</sup>C NMR (126 MHz, CDCl<sub>3</sub>) δ 147.5, 137.6, 136.8, 130.0, 129.4, 100.7, 21.4. The spectra data was consistent with that reported.<sup>3</sup>

**Gram scale procedure:** To the stirred solution of cyclic diaryliodonium salts **1a** (1.37 g, 3 mmol), CuI (28.5 mg, 5 mol%) in DCM (20 mL) was added *n*Bu<sub>4</sub>NI (1.33 g, 3.6 mmol). The reaction mixture was stirred at room temperature for 16 h. Then the solvent was concentrated in vacuo. The residue was purified by column chromatography (PE/EtOAc = 200:1) on silica gel to obtain the desired product **2a** (1.28 g, 99%) as a white solid.

### 6,6'-diiodo-2,2',3,3'-tetramethyl-1,1'-biphenyl (**2b**)

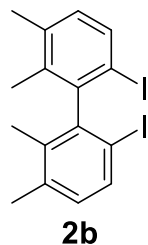

Following the procedure **B**, **2b** was purified by PE/EtOAc (200:1) and obtained as a white solid (89.6 mg, 97%). Mp = 123.6-124.5 °C; <sup>1</sup>H NMR (500 MHz, CDCl<sub>3</sub>) δ 7.71 (d, *J* = 8.0 Hz, 2H), 6.93 (d, *J* = 8.0 Hz, 2H), 2.31 (s, 6H), 1.93 (s, 6H). <sup>13</sup>C NMR (126 MHz, CDCl<sub>3</sub>) δ 147.9, 137.1,

136.3, 136.1, 130.8, 97.6, 20.3, 17.8. HRMS (EI)  $m/z$ :  $[M]^+$  Calcd for  $C_{16}H_{16}I_2$  461.9342; Found 461.9357.

**4,4'-difluoro-2,2'-diiodo-6,6'-dimethyl-1,1'-biphenyl (2c)**

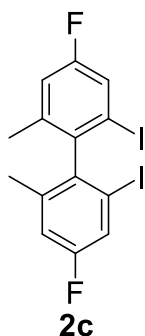

Following the procedure **B**, **2c** was purified by PE/EtOAc (200:1) and obtained as a white solid (90.2 mg, 96%). Mp = 90.8-91.7 °C;  $^1H$  NMR (500 MHz,  $CDCl_3$ )  $\delta$  7.55 (dd,  $J$  = 7.8, 2.5 Hz, 2H), 7.09 – 6.98 (m, 2H), 2.02 (s, 6H).  $^{13}C$  NMR (126 MHz,  $CDCl_3$ )  $\delta$  161.5 (d,  $J_{C-F}$  = 251.6 Hz), 142.7 (d,  $J_{C-F}$  = 3.4 Hz), 139.3 (d,  $J_{C-F}$  = 8.1 Hz), 123.8 (d,  $J_{C-F}$  = 23.4 Hz), 117.2 (d,  $J_{C-F}$  = 21.2 Hz), 100.4 (d,  $J_{C-F}$  = 8.9 Hz), 21.7 (d,  $J_{C-F}$  = 1.6 Hz). HRMS (EI)  $m/z$ :  $[M]^+$  Calcd for  $C_{14}H_{10}F_2I_2$  469.8840; Found 469.8838.

**4,4'-dichloro-2,2'-diiodo-6,6'-dimethyl-1,1'-biphenyl (2d)**

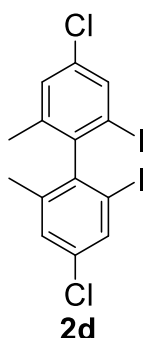

Following the procedure **B**, **2d** was purified by PE/EtOAc (200:1) and obtained as a white solid (95.3 mg, 95%). Mp = 130.7-131.6 °C;  $^1H$  NMR (500 MHz,  $CDCl_3$ )  $\delta$  7.82 (d,  $J$  = 2.0 Hz, 2H), 7.31 (d,  $J$  = 2.0 Hz, 2H), 2.00 (s, 6H).  $^{13}C$  NMR (126 MHz,  $CDCl_3$ )  $\delta$  145.0, 138.7, 136.3, 134.3, 130.3, 100.5, 21.4. HRMS (EI)  $m/z$ :  $[M]^+$  Calcd for  $C_{14}H_{10}Cl_2I_2$  501.8249; Found 501.8253.

**2,2'-dichloro-6,6'-diiodo-1,1'-biphenyl (2e)**

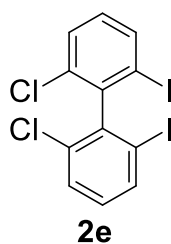



Following the procedure **B**, **2e** was purified by PE/EtOAc (200:1) and obtained as a white solid (89.1 mg, 94%). Mp = 148.5-149.5 °C; <sup>1</sup>H NMR (500 MHz, CDCl<sub>3</sub>) δ 7.90 (dd, *J* = 8.0, 1.1 Hz, 2H), 7.53 (dd, *J* = 8.0, 1.1 Hz, 2H), 7.09 (td, *J* = 8.0, 1.0 Hz, 2H). <sup>13</sup>C NMR (126 MHz, CDCl<sub>3</sub>) δ 145.1, 137.6, 133.6, 130.9, 129.5, 100.2. HRMS (EI) *m/z*: [M]<sup>+</sup> Calcd for C<sub>12</sub>H<sub>6</sub>Cl<sub>2</sub>I<sub>2</sub> 473.7936; Found 473.7950.

**4-fluoro-2,2'-diiodo-6,6'-dimethyl-1,1'-biphenyl (2f)**

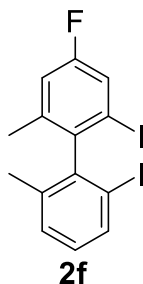

Following the procedure **B**, **2f** was purified by PE/EtOAc (200:1) and obtained as a white solid (87.7 mg, 97%). Mp = 72.5-73.3 °C; <sup>1</sup>H NMR (500 MHz, CDCl<sub>3</sub>) δ 7.82 (d, *J* = 7.9 Hz, 1H), 7.55 (dd, *J* = 7.9, 2.6 Hz, 1H), 7.31 – 7.28 (m, 1H), 7.07 – 6.99 (m, 2H), 2.02 (s, 6H). <sup>13</sup>C NMR (126 MHz, CDCl<sub>3</sub>) δ 161.4 (d, *J*<sub>C-F</sub> = 251.0 Hz), 146.5, 143.7 (d, *J*<sub>C-F</sub> = 3.5 Hz), 139.0 (d, *J*<sub>C-F</sub> = 8.0 Hz), 137.8, 136.9, 130.1, 129.6, 123.7 (d, *J*<sub>C-F</sub> = 23.8 Hz), 117.2 (d, *J*<sub>C-F</sub> = 20.7 Hz), 101.1, 99.9 (d, *J*<sub>C-F</sub> = 8.5 Hz), 21.7, 21.4. HRMS (EI) *m/z*: [M]<sup>+</sup> Calcd for C<sub>14</sub>H<sub>11</sub>FI<sub>2</sub> 451.8934; Found 451.8939.

**4-chloro-2,2'-diiodo-6,6'-dimethyl-1,1'-biphenyl (2g)**

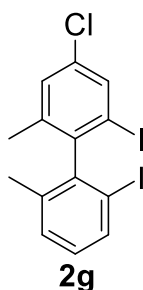

Following the procedure **B**, **2g** was purified by PE/EtOAc (200:1) and obtained as a white solid (88.9 mg, 95%). Mp = 76.4-77.1 °C; <sup>1</sup>H NMR (500 MHz, CDCl<sub>3</sub>) δ 7.86 – 7.80 (m, 2H), 7.33 – 7.31 (m, 1H), 7.30 – 7.28 (m, 1H), 7.03 (t, *J* = 7.7 Hz, 1H), 2.02 (s, 3H), 2.01 (s, 3H). <sup>13</sup>C NMR (126 MHz, CDCl<sub>3</sub>) δ 146.4, 146.0, 138.7, 137.6, 136.9, 136.2, 133.9, 130.20, 130.15, 129.7, 100.6, 100.5, 21.42, 21.38. HRMS (EI) *m/z*: [M]<sup>+</sup> Calcd for C<sub>14</sub>H<sub>11</sub>ClI<sub>2</sub> 467.8639; Found 467.8657.

**3-chloro-2,2'-diiodo-6,6'-dimethyl-1,1'-biphenyl (2h)**

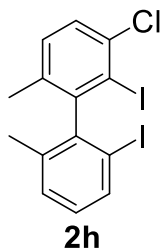

Following the procedure **B**, **2h** was purified by PE/EtOAc (200:1) and obtained as a white solid (91.7 mg, 98%). Mp = 123.8-124.4 °C; <sup>1</sup>H NMR (500 MHz, CDCl<sub>3</sub>) δ 7.83 (d, *J* = 7.9 Hz, 1H), 7.41 (d, *J* = 8.1 Hz, 1H), 7.32 – 7.28 (m, 1H), 7.26 – 7.22 (m, 1H), 7.03 (t, *J* = 7.7 Hz, 1H), 2.01 (s, 3H), 2.00 (s, 3H). <sup>13</sup>C NMR (126 MHz, CDCl<sub>3</sub>) δ 150.0, 147.9, 137.3, 136.9, 136.8, 135.4, 131.2, 130.2, 129.6, 128.3, 104.8, 100.2, 21.3, 21.0. HRMS (EI) *m/z*: [M]<sup>+</sup> Calcd for C<sub>14</sub>H<sub>11</sub>ClI<sub>2</sub> 467.8639; Found 467.8650.

**2,2'-diiodo-3-methoxy-6,6'-dimethyl-1,1'-biphenyl (2i)**

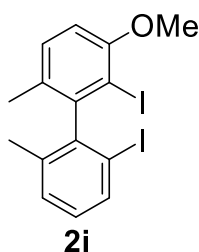

Following the procedure **B**, **2i** was purified by PE/EtOAc (50:1) and obtained as a colourless oil (90.9 mg, 98%). <sup>1</sup>H NMR (600 MHz, CDCl<sub>3</sub>) δ 7.82 (d, *J* = 7.9 Hz, 1H), 7.30 (s, 1H), 7.25 (d, *J* = 8.3 Hz, 1H), 7.02 (t, *J* = 7.7 Hz, 1H), 6.80 (d, *J* = 8.3 Hz, 1H), 3.95 (s, 3H), 2.02 (s, 3H), 1.98 (s, 3H). <sup>13</sup>C NMR (151 MHz, CDCl<sub>3</sub>) δ 156.8, 149.0, 147.6, 137.5, 136.8, 130.8, 130.0, 129.30, 129.26, 110.0, 100.6, 92.4, 56.5, 21.3, 20.4. HRMS (EI) *m/z*: [M]<sup>+</sup> Calcd for C<sub>15</sub>H<sub>14</sub>OI<sub>2</sub> 463.9134; Found 463.9144.

**2-chloro-2',6'-diiodo-6'-methyl-1,1'-biphenyl (2j)**

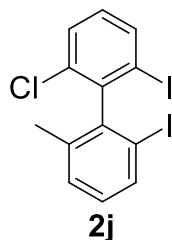

Following the procedure **B**, **2j** was purified by PE/EtOAc (200:1) and obtained as a white solid (86.2 mg, 95%). Mp = 93.5-94.5 °C; <sup>1</sup>H NMR (500 MHz, CDCl<sub>3</sub>) δ 7.90 (dd, *J* = 7.9, 1.1 Hz, 1H), 7.82 (d, *J* = 7.9 Hz, 1H), 7.52 (dd, *J* = 8.0, 1.1 Hz, 1H), 7.30 (d, *J* = 7.6 Hz, 1H), 7.06 (td, *J* = 7.9, 3.9 Hz, 2H), 2.08 (s, 3H). <sup>13</sup>C NMR (126 MHz, CDCl<sub>3</sub>) δ 146.33, 146.25, 137.83, 137.78, 136.7, 133.4, 130.4, 129.95, 129.93, 129.6, 100.9, 100.0, 21.2. HRMS (EI) *m/z*: [M]<sup>+</sup> Calcd for C<sub>13</sub>H<sub>9</sub>ClI<sub>2</sub> 453.8482; Found 453.8483.

**2,4-dichloro-2',6-diiodo-6'-methyl-1,1'-biphenyl (2k)**

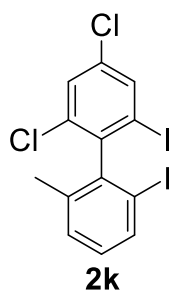

Following the procedure **B**, **2k** was purified by PE/EtOAc (200:1) and obtained as a colourless oil (95.6 mg, 98%). <sup>1</sup>H NMR (500 MHz, CDCl<sub>3</sub>) δ 7.91 (d, *J* = 2.0 Hz, 1H), 7.82 (d, *J* = 7.9 Hz, 1H), 7.55 (d, *J* = 2.1 Hz, 1H), 7.30 (d, *J* = 7.6 Hz, 1H), 7.06 (t, *J* = 7.8 Hz, 1H), 2.07 (s, 3H). <sup>13</sup>C NMR (126 MHz, CDCl<sub>3</sub>) δ 145.3, 145.0, 137.8, 137.4, 136.7, 134.8, 133.7, 130.2, 130.0, 129.7, 100.7, 99.9, 21.2. HRMS (EI) *m/z*: [M]<sup>+</sup> Calcd for C<sub>13</sub>H<sub>8</sub>Cl<sub>2</sub>I<sub>2</sub> 487.8093; Found 487.8102.

**2-chloro-2',6-diiodo-6'-methyl-4-(trifluoromethyl)-1,1'-biphenyl (2l)**

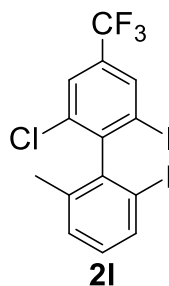

Following the procedure **B**, **2l** was purified by PE/EtOAc (200:1) and obtained as a colourless oil (96.4 mg, 94%). <sup>1</sup>H NMR (600 MHz, CDCl<sub>3</sub>) δ 8.14 (dd, *J* = 1.7, 0.8 Hz, 1H), 7.86 – 7.83 (m, 1H), 7.80 (dd, *J* = 1.7, 0.8 Hz, 1H), 7.33 (dt, *J* = 7.6, 1.0 Hz, 1H), 7.09 (t, *J* = 7.8 Hz, 1H), 2.07 (s, 3H). <sup>13</sup>C NMR (151 MHz, CDCl<sub>3</sub>) δ 150.0, 145.3, 137.4, 136.9, 134.6 (q, *J*<sub>C-F</sub> = 3.5 Hz), 134.1, 132.5 (q, *J*<sub>C-F</sub> = 33.9 Hz), 130.4, 130.1, 126.7 (q, *J*<sub>C-F</sub> = 3.5 Hz), 122.1 (q, *J*<sub>C-F</sub> = 273.4 Hz), 101.1, 98.9, 21.1. HRMS (EI) *m/z*: [M]<sup>+</sup> Calcd for C<sub>14</sub>H<sub>8</sub>ClI<sub>2</sub>F<sub>3</sub> 521.8356; Found 521.8376.

**2-bromo-2'-iodo-6,6'-dimethyl-1,1'-biphenyl (3a)**

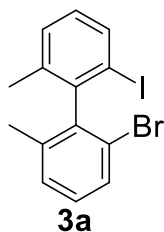

To the stirred solution of cyclic diaryliodonium salts **1a** (91.2 mg, 0.2 mmol), CuBr (1.4 mg, 5 mol %) in DCM (2 mL) was added *n*Bu<sub>4</sub>NBr (77.4 mg, 0.24 mmol). The reaction mixture was stirred at room temperature for 16 h. Then the solvent was concentrated in vacuo. The residue was purified by column chromatography (PE/EtOAc = 200:1) on silica gel to obtain the desired product **3a** (76.4 mg, 99%) as a white solid. Mp = 78.5-79.3 °C; <sup>1</sup>H NMR (500 MHz, CDCl<sub>3</sub>) δ

7.84 – 7.80 (m, 1H), 7.57 – 7.52 (m, 1H), 7.31 – 7.26 (m, 2H), 7.19 (t,  $J = 7.8$  Hz, 1H), 7.02 (t,  $J = 7.7$  Hz, 1H), 2.05 (s, 3H), 2.02 (s, 3H).  $^{13}\text{C}$  NMR (126 MHz,  $\text{CDCl}_3$ )  $\delta$  144.6, 143.8, 138.2, 137.7, 136.7, 130.3, 129.9, 129.3, 129.2, 129.1, 123.9, 100.4, 21.3, 20.6. HRMS (EI)  $m/z$ :  $[\text{M}]^+$  Calcd for  $\text{C}_{14}\text{H}_{12}\text{BrI}$  385.9167; Found 385.9173.

**6-bromo-6'-iodo-2,2',3,3'-tetramethyl-1,1'-biphenyl (3b)**

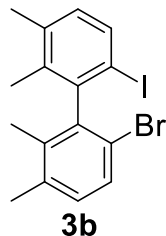

Following the procedure of **3a**, **3b** was purified by PE/EtOAc (200:1) and obtained as a white solid (80.3 mg, 97%). Mp = 91.4-92.3 °C;  $^1\text{H}$  NMR (500 MHz,  $\text{CDCl}_3$ )  $\delta$  7.70 (d,  $J = 8.0$  Hz, 1H), 7.44 (d,  $J = 8.1$  Hz, 1H), 7.08 (d,  $J = 8.1$  Hz, 1H), 6.92 (d,  $J = 8.0$  Hz, 1H), 2.31 (s, 6H), 1.95 (s, 3H), 1.91 (s, 3H).  $^{13}\text{C}$  NMR (126 MHz,  $\text{CDCl}_3$ )  $\delta$  144.9, 144.3, 137.0, 136.8, 136.5, 136.2, 136.0, 130.8, 130.5, 129.6, 121.3, 97.3, 20.35, 20.33, 17.7, 17.1. HRMS (EI)  $m/z$ :  $[\text{M}]^+$  Calcd for  $\text{C}_{16}\text{H}_{16}\text{BrI}$  413.9480; Found 413.9499.

**2-bromo-2'-iodo-4,4',6,6'-tetramethyl-1,1'-biphenyl (3c)**

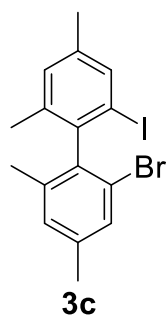

Following the procedure of **3a**, **3c** was purified by PE/EtOAc (200:1) and obtained as a white solid (78.7 mg, 95%). Mp = 111.5-112.3 °C;  $^1\text{H}$  NMR (500 MHz,  $\text{CDCl}_3$ )  $\delta$  7.42 – 7.36 (m, 1H), 7.17 (d,  $J = 1.2$  Hz, 2H), 7.08 (dt,  $J = 1.7, 0.8$  Hz, 1H), 2.51 (s, 3H), 2.38 (s, 3H), 2.00 (s, 3H), 1.95 (s, 3H).  $^{13}\text{C}$  NMR (126 MHz,  $\text{CDCl}_3$ )  $\delta$  145.1, 141.9, 139.8, 139.0, 137.7, 134.7, 130.7, 130.1, 129.6, 128.7, 123.7, 107.6, 29.4, 21.04, 20.96, 20.6. HRMS (EI)  $m/z$ :  $[\text{M}]^+$  Calcd for  $\text{C}_{16}\text{H}_{16}\text{BrI}$  413.9480; Found 413.9496.

**2-bromo-4,4'-difluoro-2'-iodo-6,6'-dimethyl-1,1'-biphenyl (3d)**

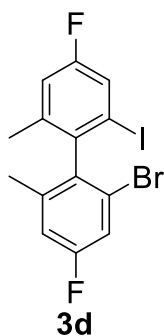

Following the procedure of **3a**, **3d** was purified by PE/EtOAc (200:1) and obtained as a white solid (79.3 mg, 94%). Mp = 66.3-67.3 °C;  $^1\text{H}$  NMR (500 MHz,  $\text{CDCl}_3$ )  $\delta$  7.54 (dd,  $J$  = 7.8, 2.6 Hz, 1H), 7.31 (dd,  $J$  = 8.1, 2.6 Hz, 1H), 7.07 – 7.00 (m, 2H), 2.03 (s, 3H), 2.00 (s, 3H).  $^{13}\text{C}$  NMR (126 MHz,  $\text{CDCl}_3$ )  $\delta$  161.8 (d,  $J_{\text{C-F}}$  = 250.5 Hz), 161.5 (d,  $J_{\text{C-F}}$  = 251.4 Hz), 140.2 (d,  $J_{\text{C-F}}$  = 7.6 Hz), 139.8 (d,  $J_{\text{C-F}}$  = 3.2 Hz), 139.4 (d,  $J_{\text{C-F}}$  = 7.4 Hz), 139.0 (d,  $J_{\text{C-F}}$  = 3.2 Hz), 124.4 (d,  $J_{\text{C-F}}$  = 10.4 Hz), 123.7 (d,  $J_{\text{C-F}}$  = 22.5 Hz), 117.6 (d,  $J_{\text{C-F}}$  = 24.2 Hz), 117.1 (d,  $J_{\text{C-F}}$  = 21.1 Hz), 116.4 (d,  $J_{\text{C-F}}$  = 20.8 Hz), 100.1 (d,  $J_{\text{C-F}}$  = 7.8 Hz), 21.5, 20.9. HRMS (EI)  $m/z$ :  $[\text{M}]^+$  Calcd for  $\text{C}_{14}\text{H}_{10}\text{F}_2\text{BrI}$  421.8979; Found 421.8970.

**2-bromo-4,4'-dichloro-2'-iodo-6,6'-dimethyl-1,1'-biphenyl (3e)**

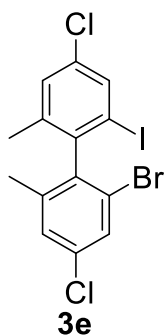

Following the procedure of **3a**, **3e** was purified by PE/EtOAc (200:1) and obtained as a white solid (89.0 mg, 98%). Mp = 126.7-127.1 °C;  $^1\text{H}$  NMR (500 MHz,  $\text{CDCl}_3$ )  $\delta$  7.81 (d,  $J$  = 2.0 Hz, 1H), 7.57 (d,  $J$  = 2.0 Hz, 1H), 7.30 (dd,  $J$  = 9.7, 2.0 Hz, 2H), 2.01 (s, 3H), 1.98 (s, 3H).  $^{13}\text{C}$  NMR (126 MHz,  $\text{CDCl}_3$ )  $\delta$  142.2, 141.4, 139.5, 138.9, 136.2, 134.3, 134.2, 130.2, 130.1, 129.5, 124.3, 100.2, 21.2, 20.6. HRMS (EI)  $m/z$ :  $[\text{M}]^+$  Calcd for  $\text{C}_{14}\text{H}_{10}\text{Cl}_2\text{BrI}$  453.8388; Found 453.8399.

**2-bromo-2',6-dichloro-6'-iodo-1,1'-biphenyl (3f)**

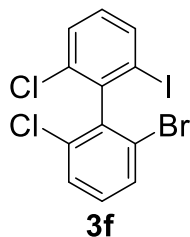

Following the procedure of **3a**, **3f** was purified by PE/EtOAc (200:1) and obtained as a white solid (79.2 mg, 93%). Mp = 164.7-165.5 °C; <sup>1</sup>H NMR (500 MHz, CDCl<sub>3</sub>) δ 7.89 (dd, *J* = 8.0, 1.1 Hz, 1H), 7.65 (dd, *J* = 8.1, 1.1 Hz, 1H), 7.51 (ddd, *J* = 9.4, 8.1, 1.1 Hz, 2H), 7.27 (t, *J* = 8.1 Hz, 1H), 7.09 (t, *J* = 8.0 Hz, 1H). <sup>13</sup>C NMR (126 MHz, CDCl<sub>3</sub>) δ 142.3, 141.7, 137.6, 134.7, 133.6, 131.2, 130.8, 130.6, 129.4, 128.7, 124.8, 99.9. HRMS (EI) *m/z*: [M]<sup>+</sup> Calcd for C<sub>12</sub>H<sub>6</sub>Cl<sub>2</sub>BrI 425.8075; Found 425.8084.

**2-chloro-2'-iodo-6,6'-dimethyl-1,1'-biphenyl (4a)**

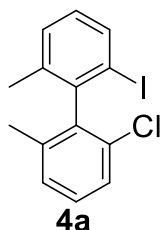

To the stirred solution of cyclic diaryliodonium salts **1a** (91.2 mg, 0.2 mmol), CuCl (1.0 mg, 5 mol %) in DCM (2 mL) was added *n*Bu<sub>4</sub>NCl (66.7 mg, 0.24 mmol). The reaction mixture was stirred at room temperature for 16 h. Then the solvent was concentrated in vacuo. The residue was purified by column chromatography (PE/EtOAc = 200:1) on silica gel to obtain the desired product **4a** (66.3 mg, 97%) as a white solid. Mp = 58.2-59.2 °C; <sup>1</sup>H NMR (500 MHz, CDCl<sub>3</sub>) δ 7.82 (d, *J* = 7.9 Hz, 1H), 7.37 (dd, *J* = 7.8, 1.4 Hz, 1H), 7.31 – 7.25 (m, 2H), 7.23 (ddd, *J* = 7.6, 1.5, 0.8 Hz, 1H), 7.02 (t, *J* = 7.7 Hz, 1H), 2.05 (s, 3H), 2.01 (s, 3H). <sup>13</sup>C NMR (126 MHz, CDCl<sub>3</sub>) δ 143.0, 142.0, 138.0, 137.9, 136.7, 133.3, 129.9, 129.3, 128.8, 128.5, 127.0, 100.4, 21.2, 20.2. HRMS (EI) *m/z*: [M]<sup>+</sup> Calcd for C<sub>14</sub>H<sub>12</sub>ClI 341.9672; Found 341.9665.

**6-chloro-6'-iodo-2,2',3,3'-tetramethyl-1,1'-biphenyl (4b)**

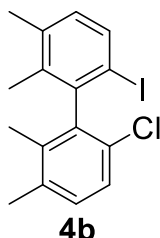

Following the procedure of **4a**, **4b** was purified by PE/EtOAc (200:1) and obtained as a white solid (72.5 mg, 98%). Mp = 80.0-81.2 °C; <sup>1</sup>H NMR (500 MHz, CDCl<sub>3</sub>) δ 7.70 (d, *J* = 8.0 Hz, 1H), 7.26 (d, *J* = 8.1 Hz, 1H), 7.15 (d, *J* = 8.2 Hz, 1H), 6.92 (d, *J* = 8.0 Hz, 1H), 2.33 (s, 3H), 2.31 (s, 3H), 1.95 (s, 3H), 1.89 (s, 3H). <sup>13</sup>C NMR (126 MHz, CDCl<sub>3</sub>) δ 143.3, 142.6, 137.0, 136.6, 136.5, 136.0, 135.5, 130.8, 130.2, 126.4, 97.2, 20.32, 20.30, 17.7, 16.7. HRMS (EI) *m/z*: [M]<sup>+</sup> Calcd for C<sub>16</sub>H<sub>16</sub>ClI 369.9985; Found 369.9974.

**2-chloro-2'-iodo-4,4',6,6'-tetramethyl-1,1'-biphenyl (4c)**

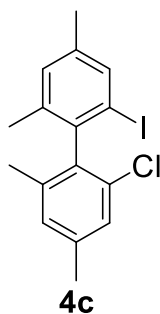

Following the procedure of **4a**, **4c** was purified by PE/EtOAc (200:1) and obtained as a white solid (71.0 mg, 96%). Mp = 112.3-113.0 °C; <sup>1</sup>H NMR (500 MHz, CDCl<sub>3</sub>) δ 7.18 – 7.16 (m, 1H), 7.15 (s, 2H), 7.04 – 7.01 (m, 1H), 2.49 (s, 3H), 2.37 (s, 3H), 1.98 (s, 3H), 1.91 (s, 3H). <sup>13</sup>C NMR (126 MHz, CDCl<sub>3</sub>) δ 143.6, 140.1, 139.8, 138.7, 137.6, 134.8, 132.9, 129.6, 129.5, 128.7, 127.5, 107.6, 29.4, 21.1, 20.9, 20.1. HRMS (EI) m/z: [M]<sup>+</sup> Calcd for C<sub>16</sub>H<sub>16</sub>ClI 369.9985; Found 369.9987.

**2-chloro-4,4'-difluoro-2'-iodo-6,6'-dimethyl-1,1'-biphenyl (4d)**

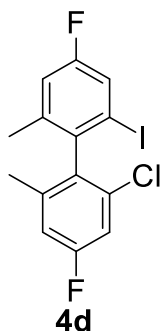

Following the procedure of **4a**, **4d** was purified by PE/EtOAc (200:1) and obtained as a white solid (74.1 mg, 98%). Mp = 60.0-60.6 °C; <sup>1</sup>H NMR (500 MHz, CDCl<sub>3</sub>) δ 7.54 (dd, *J* = 7.7, 2.9 Hz, 1H), 7.12 (dt, *J* = 5.7, 2.8 Hz, 1H), 7.08 – 7.01 (m, 1H), 6.97 (dt, *J* = 5.8, 2.9 Hz, 1H), 2.03 (s, 3H), 1.98 (s, 3H). <sup>13</sup>C NMR (126 MHz, CDCl<sub>3</sub>) δ 161.9 (d, *J*<sub>C-F</sub> = 250.0 Hz), 161.5 (d, *J*<sub>C-F</sub> = 251.5 Hz), 140.1 (d, *J*<sub>C-F</sub> = 8.6 Hz), 139.6 (d, *J*<sub>C-F</sub> = 8.2 Hz), 138.2 (d, *J*<sub>C-F</sub> = 4.2 Hz), 137.2 (d, *J*<sub>C-F</sub> = 3.6 Hz), 134.4 (d, *J*<sub>C-F</sub> = 6.9 Hz), 123.8 (d, *J*<sub>C-F</sub> = 23.3 Hz), 117.1 (d, *J*<sub>C-F</sub> = 20.7 Hz), 115.8 (d, *J*<sub>C-F</sub> = 21.4 Hz), 114.5 (d, *J*<sub>C-F</sub> = 24.6 Hz), 100.0, 21.4, 20.4. HRMS (EI) m/z: [M]<sup>+</sup> Calcd for C<sub>14</sub>H<sub>10</sub>F<sub>2</sub>ClI 377.9484; Found 377.9487.

**2,4,4'-trichloro-2'-iodo-6,6'-dimethyl-1,1'-biphenyl (4e)**

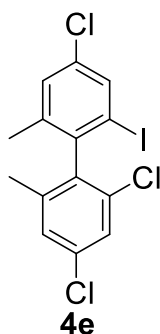

Following the procedure of **4a**, **4e** was purified by PE/EtOAc (200:1) and obtained as a white solid (79.5 mg, 97%). Mp = 114.5-115.3 °C; <sup>1</sup>H NMR (500 MHz, CDCl<sub>3</sub>) δ 7.81 (d, *J* = 2.0 Hz, 1H), 7.39 (d, *J* = 2.0 Hz, 1H), 7.31 (t, *J* = 1.4 Hz, 1H), 7.25 (d, *J* = 1.8 Hz, 1H), 2.02 (s, 3H), 1.97 (s, 3H). <sup>13</sup>C NMR (126 MHz, CDCl<sub>3</sub>) δ 140.6, 139.6, 139.5, 139.0, 136.2, 134.24, 134.19, 134.1, 130.1, 128.9, 127.1, 100.2, 21.1, 20.1. HRMS (EI) *m/z*: [M]<sup>+</sup> Calcd for C<sub>14</sub>H<sub>10</sub>Cl<sub>4</sub>I 409.8893; Found 409.8884.

#### 2,2',6-trichloro-6'-iodo-1,1'-biphenyl (**4f**)

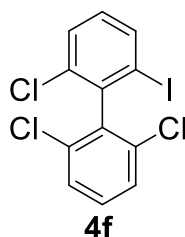

Following the procedure of **4a**, **4f** was purified by PE/EtOAc (200:1) and obtained as a white solid (72.6 mg, 95%). Mp = 166.2-166.8 °C; <sup>1</sup>H NMR (500 MHz, CDCl<sub>3</sub>) δ 7.89 (dd, *J* = 8.0, 1.1 Hz, 1H), 7.53 (dd, *J* = 8.1, 1.1 Hz, 1H), 7.49 – 7.44 (m, 2H), 7.35 (dd, *J* = 8.6, 7.5 Hz, 1H), 7.09 (t, *J* = 8.0 Hz, 1H). <sup>13</sup>C NMR (126 MHz, CDCl<sub>3</sub>) δ 140.7, 140.0, 137.5, 134.9, 133.7, 130.8, 130.2, 129.4, 128.0, 99.9. HRMS (EI) *m/z*: [M]<sup>+</sup> Calcd for C<sub>12</sub>H<sub>6</sub>Cl<sub>3</sub>I 381.8580; Found 381.8576.

#### 4. Examples of enantioselective halogenative of cyclic diaryliodonium salts

##### (*R*)-2,2'-diiodo-6,6'-dimethyl-1,1'-biphenyl (**2a'**)

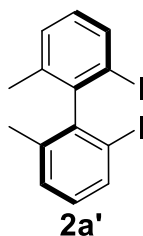

To the stirred solution of cyclic diaryliodonium salts **1a** (91.2 mg, 0.2 mmol), CuI (1.9 mg, 5 mol %), **L6** (5.0 mg, 7.5 mol %) in DCM (2 mL) was added NaI (36.0 mg, 0.24 mmol). The reaction mixture was stirred at room temperature for 20 h. Then the solvent was concentrated in vacuo. The residue was purified by column chromatography (PE/EtOAc = 200:1) on silica



gel to obtain the desired product **2a'** (85.0 mg, 98%, 98% ee) as a white solid. Mp = 68.1-69.0 °C; HPLC conditions: Chiralpak IC, isopropanol/hexanes = 0.5:99.5, flow: 0.4 mL/min,  $\lambda$  = 254 nm,  $t_R$  = 8.521 min (minor), 9.027 min (major).  $[\alpha]_D^{20}$  -29.6 (*c* 0.5, CH<sub>2</sub>Cl<sub>2</sub>); <sup>1</sup>H NMR (500 MHz, CDCl<sub>3</sub>)  $\delta$  7.85 – 7.81 (m, 2H), 7.30 (dt, *J* = 7.6, 0.9 Hz, 2H), 7.03 (t, *J* = 7.7 Hz, 2H), 2.04 (s, 6H) ppm. <sup>13</sup>C NMR (126 MHz, CDCl<sub>3</sub>)  $\delta$  147.5, 137.6, 136.8, 130.0, 129.4, 100.7, 21.4. The spectra data was consistent with that reported.<sup>3</sup>

**(R)-6,6'-diiodo-2,2',3,3'-tetramethyl-1,1'-biphenyl (2b')**

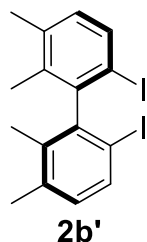

Following the procedure of **2a'**, **2b'** was purified by PE/EtOAc (200:1) and obtained as a white solid (86.8 mg, 94%, 97% ee). Mp = 123.6-124.5 °C; HPLC conditions: Chiralpak IC, isopropanol/hexanes = 0.5:99.5, flow: 0.4 mL/min,  $\lambda$  = 254 nm,  $t_R$  = 9.602 min (minor), 10.610 min (major).  $[\alpha]_D^{20}$  -44.0 (*c* 0.5, CH<sub>2</sub>Cl<sub>2</sub>); <sup>1</sup>H NMR (500 MHz, CDCl<sub>3</sub>)  $\delta$  7.71 (d, *J* = 8.0 Hz, 2H), 6.93 (d, *J* = 8.0 Hz, 2H), 2.31 (s, 6H), 1.93 (s, 6H). <sup>13</sup>C NMR (126 MHz, CDCl<sub>3</sub>)  $\delta$  147.9, 137.1, 136.3, 136.1, 130.8, 97.6, 20.3, 17.8. HRMS (EI) *m/z*: [M]<sup>+</sup> Calcd for C<sub>16</sub>H<sub>16</sub>I<sub>2</sub> 461.9342; Found 461.9357.

**(R)-6-bromo-6'-iodo-2,2',3,3'-tetramethyl-1,1'-biphenyl (3b')**

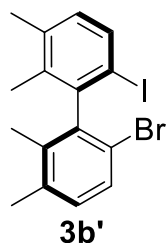

To the stirred solution of cyclic diaryliodonium salts **1a** (91.2 mg, 0.2 mmol), CuBr (1.4 mg, 5 mol%), **L6** (5.0 mg, 7.5 mol%) in DCM (2 mL) was added LiBr (20.8 mg, 0.24 mmol). The reaction mixture was stirred at room temperature for 20 h. Then the solvent was concentrated in vacuo. The residue was purified by column chromatography (PE/EtOAc = 200:1) on silica gel to obtain the desired product **3b'** (80.3 mg, 97%, 97% ee) as a white solid. Mp = 91.4-92.3 °C; HPLC conditions: Chiralpak IC, isopropanol/hexanes = 0.5:99.5, flow: 0.4 mL/min,  $\lambda$  = 254 nm,  $t_R$  = 9.659 min (minor), 11.320 min (major).  $[\alpha]_D^{20}$  -18.0 (*c* 0.5, CH<sub>2</sub>Cl<sub>2</sub>); <sup>1</sup>H NMR (500 MHz, CDCl<sub>3</sub>)  $\delta$  7.70 (d, *J* = 8.0 Hz, 1H), 7.44 (d, *J* = 8.1 Hz, 1H), 7.08 (d, *J* = 8.1 Hz, 1H), 6.92 (d, *J* = 8.0 Hz, 1H), 2.31 (s, 6H), 1.95 (s, 3H), 1.91 (s, 3H). <sup>13</sup>C NMR (126 MHz, CDCl<sub>3</sub>)  $\delta$  144.9, 144.3, 137.0, 136.8, 136.5, 136.2, 136.0, 130.8, 130.5, 129.6, 121.3, 97.3, 20.35, 20.33, 17.7, 17.1. HRMS (EI) *m/z*: [M]<sup>+</sup> Calcd for C<sub>16</sub>H<sub>16</sub>BrI 413.9480; Found 413.9499.

**(R)-2-bromo-2'-iodo-4,4',6,6'-tetramethyl-1,1'-biphenyl (3c')**

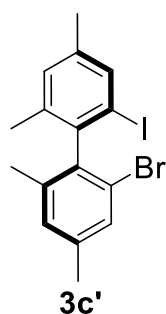

Following the procedure of **3b'**, **3c'** was purified by PE/EtOAc (200:1) and obtained as a white solid (78.7 mg, 95%, 97% ee). Mp = 111.5-112.3 °C; HPLC conditions: Chiralpak IC, isopropanol/hexanes = 0.5:99.5, flow: 0.4 mL/min,  $\lambda$  = 254 nm,  $t_R$  = 9.943 min (minor), 10.982 min (major).  $[\alpha]_D^{20}$  -14.0 (*c* 0.5, CH<sub>2</sub>Cl<sub>2</sub>); <sup>1</sup>H NMR (500 MHz, CDCl<sub>3</sub>)  $\delta$  7.42 – 7.36 (m, 1H), 7.17 (d, *J* = 1.2 Hz, 2H), 7.08 (dt, *J* = 1.7, 0.8 Hz, 1H), 2.51 (s, 3H), 2.38 (s, 3H), 2.00 (s, 3H), 1.95 (s, 3H). <sup>13</sup>C NMR (126 MHz, CDCl<sub>3</sub>)  $\delta$  145.1, 141.9, 139.8, 139.0, 137.7, 134.7, 130.7, 130.1, 129.6, 128.7, 123.7, 107.6, 29.4, 21.04, 20.96, 20.6. HRMS (EI) *m/z*: [M]<sup>+</sup> Calcd for C<sub>16</sub>H<sub>16</sub>BrI 413.9480; Found 413.9496.

**(R)-6-bromo-6'-iodo-2,2',3,3'-tetramethyl-1,1'-biphenyl (4b')**

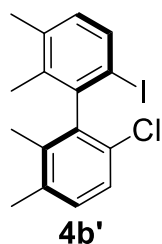

To the stirred solution of cyclic diaryliodonium salts **1a** (91.2 mg, 0.2 mmol), CuCl (1.0 mg, 5 mol%), **L6** (5.0 mg, 7.5 mol%) in DCM (2 mL) was added LiBr (10.2 mg, 0.24 mmol). The reaction mixture was stirred at room temperature for 20 h. Then the solvent was concentrated in vacuo. The residue was purified by column chromatography (PE/EtOAc = 200:1) on silica gel to obtain the desired product **4b'** (73.3 mg, 99%, 97% ee) as a white solid. Mp = 80.0-81.2 °C; HPLC conditions: Chiralpak IC, isopropanol/hexanes = 0.5:99.5, flow: 0.4 mL/min,  $\lambda$  = 254 nm,  $t_R$  = 9.558 min (minor), 11.192 min (major).  $[\alpha]_D^{20}$  -30.0 (*c* 0.5, CH<sub>2</sub>Cl<sub>2</sub>); <sup>1</sup>H NMR (500 MHz, CDCl<sub>3</sub>)  $\delta$  7.70 (d, *J* = 8.0 Hz, 1H), 7.26 (d, *J* = 8.1 Hz, 1H), 7.15 (d, *J* = 8.2 Hz, 1H), 6.92 (d, *J* = 8.0 Hz, 1H), 2.33 (s, 3H), 2.31 (s, 3H), 1.95 (s, 3H), 1.89 (s, 3H). <sup>13</sup>C NMR (126 MHz, CDCl<sub>3</sub>)  $\delta$  143.3, 142.6, 137.0, 136.6, 136.5, 136.0, 135.5, 130.8, 130.2, 126.4, 97.2, 20.32, 20.30, 17.7, 16.7. HRMS (EI) *m/z*: [M]<sup>+</sup> Calcd for C<sub>16</sub>H<sub>16</sub>ClI 369.9985; Found 369.9974.

**(R)-2-chloro-2'-iodo-4,4',6,6'-tetramethyl-1,1'-biphenyl (4c')**

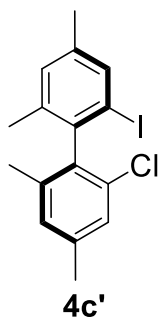

Following the procedure of **4b'**, **4c'** was purified by PE/EtOAc (200:1) and obtained as a white solid (70.3 mg, 95%, 95% ee). Mp = 112.3-113.0 °C; HPLC conditions: Chiralpak IC, isopropanol/hexanes = 0.5:99.5, flow: 0.4 mL/min,  $\lambda$  = 254 nm,  $t_R$  = 8.930 min (minor), 9.441 min (major).  $[\alpha]_D^{20}$  -6.0 (*c* 0.5, CH<sub>2</sub>Cl<sub>2</sub>); <sup>1</sup>H NMR (500 MHz, CDCl<sub>3</sub>)  $\delta$  7.18 – 7.16 (m, 1H), 7.15 (s, 2H), 7.04 – 7.01 (m, 1H), 2.49 (s, 3H), 2.37 (s, 3H), 1.98 (s, 3H), 1.91 (s, 3H). <sup>13</sup>C NMR (126 MHz, CDCl<sub>3</sub>)  $\delta$  143.6, 140.1, 139.8, 138.7, 137.6, 134.8, 132.9, 129.6, 129.5, 128.7, 127.5, 107.6, 29.4, 21.1, 20.9, 20.1. HRMS (EI) *m/z*: [M]<sup>+</sup> Calcd for C<sub>16</sub>H<sub>16</sub>ClI 369.9985; Found 369.9987.

## 5. References

- [1] Zhao, K.; Duan, L.-H.; Xu, S.-B.; Jiang, J.-L.; Fu, Y.; Gu, Z.-H. Enhanced Reactivity by Torsional Strain of Cyclic Diaryliodonium in Cu-Catalyzed Enantioselective Ring-Opening Reaction. *Chem.* **2018**, *4*, 599-612.
- [2] Zhu, K.; Xu, K.; Fang, Q.; Wang, Y.; Tang, B.; Zhang, F. Enantioselective Synthesis of Axially Chiral Biaryls via Cu-Catalyzed Acyloxylation of Cyclic Diaryliodonium Salts. *ACS Catal.* **2019**, *9*, 4951-4957.
- [3] Deng, R.; Zhan, S.; Li, C.; Gu, Z.-H. Hypervalent Iodine-Mediated Carbon-Carbon Bond Cleavage and Dearomatization of 9H-Fluoren-9-ols. *Angew. Chem. Int. Ed.* **2020**, *59*, 3093-3098.

## 6. Copies of NMR spectra

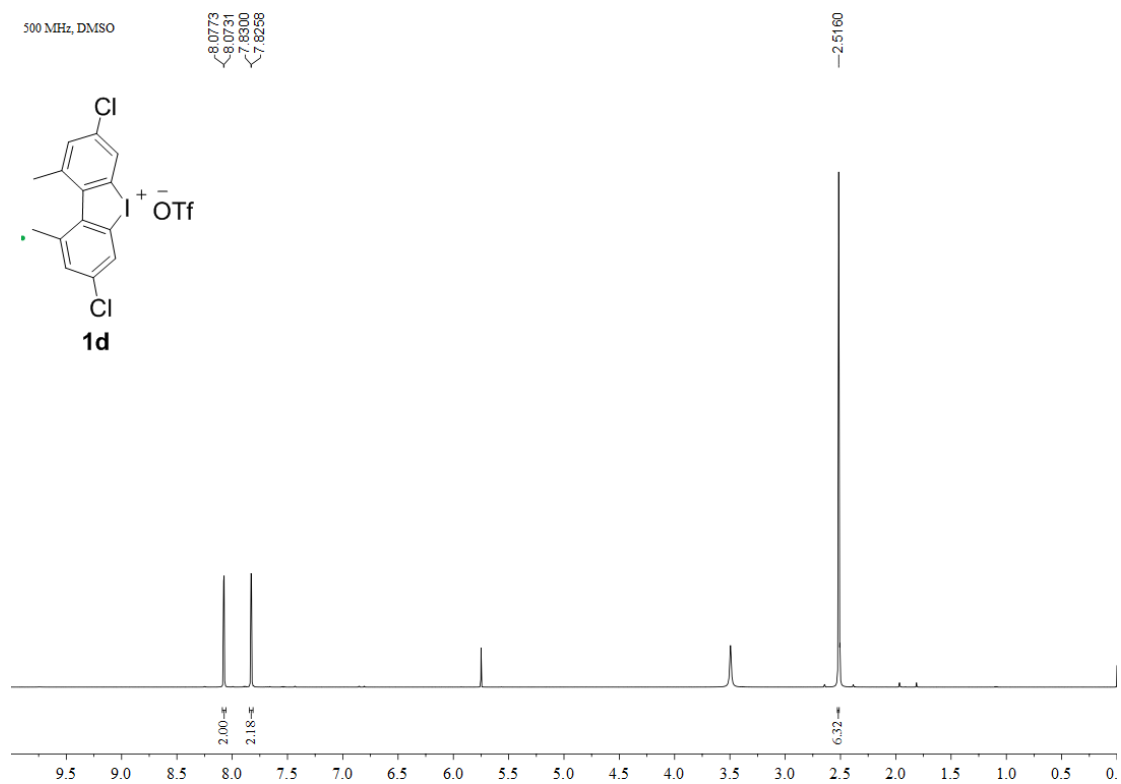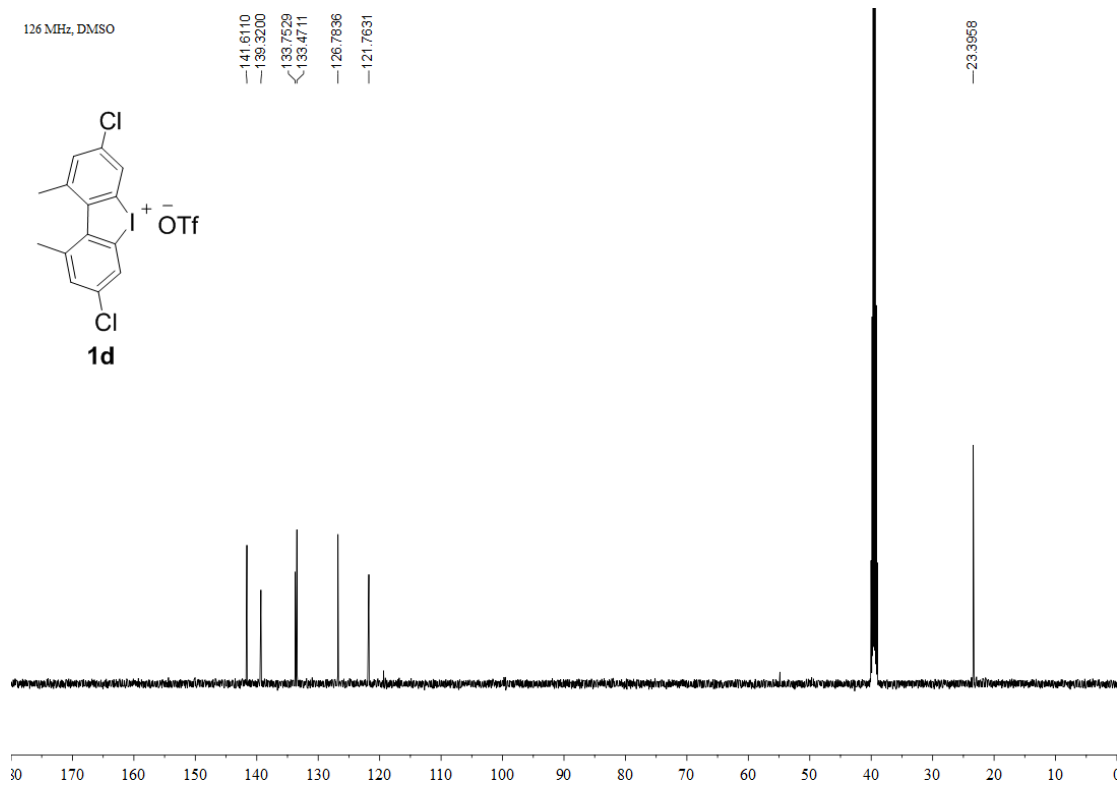

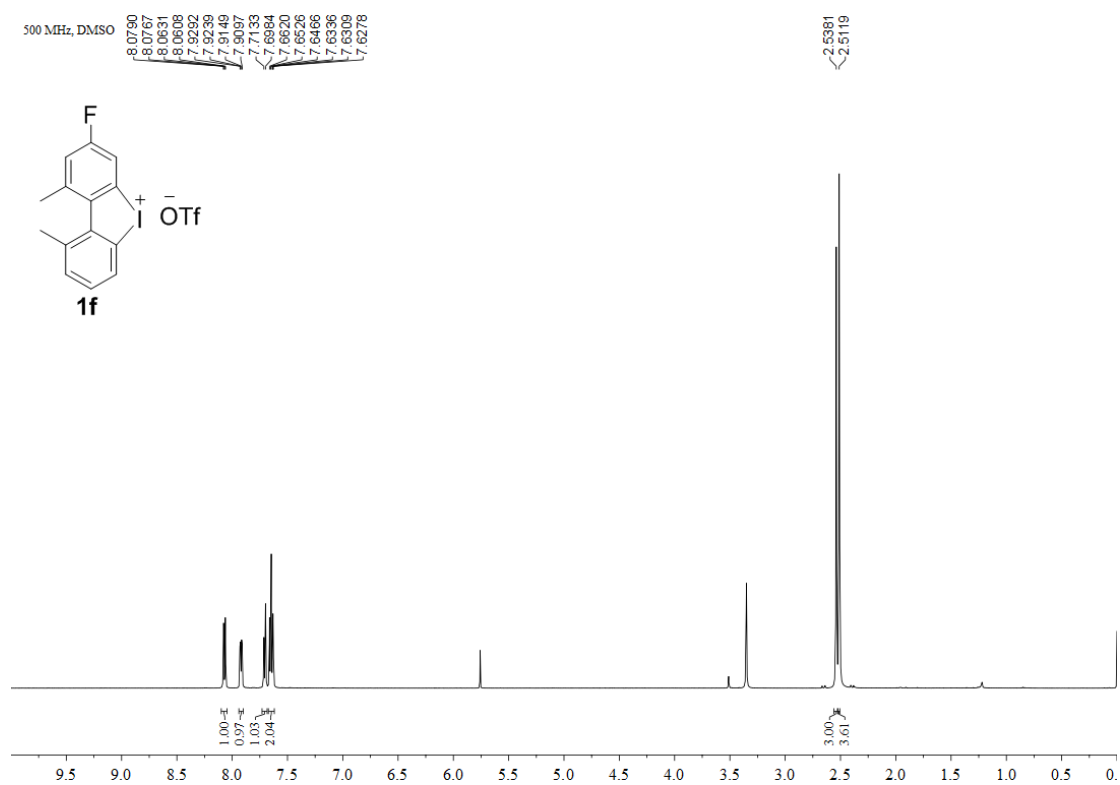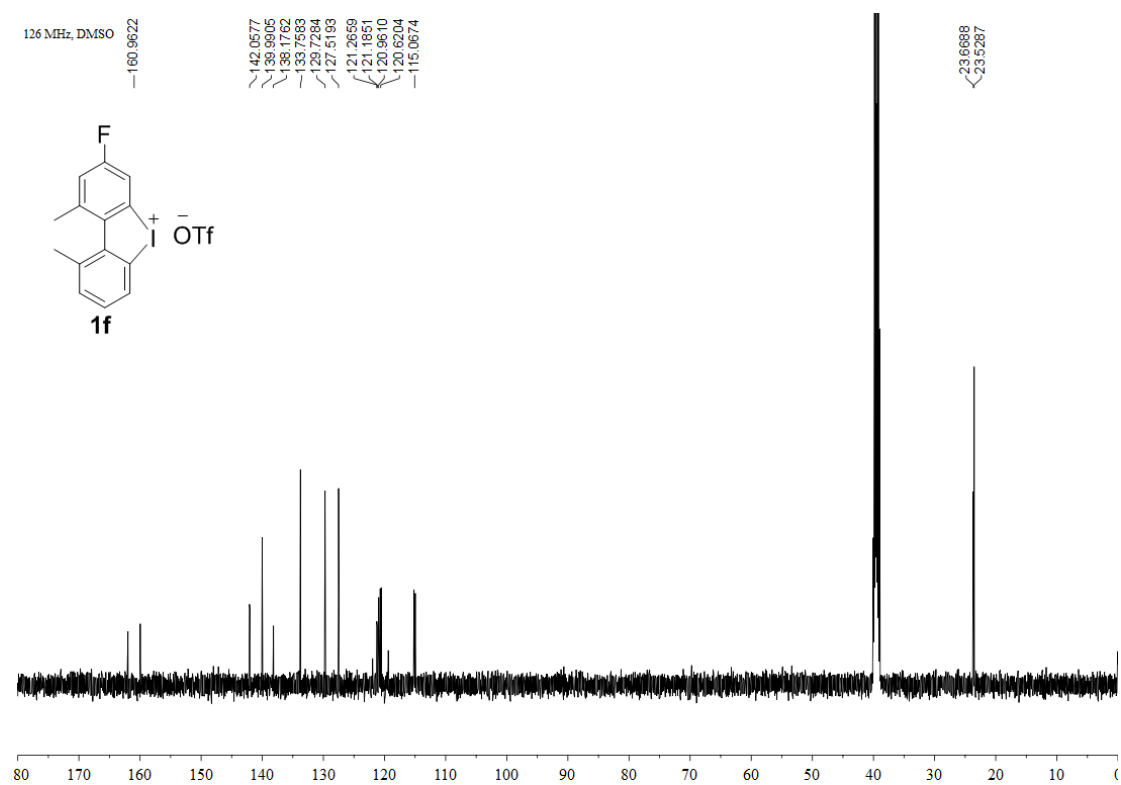

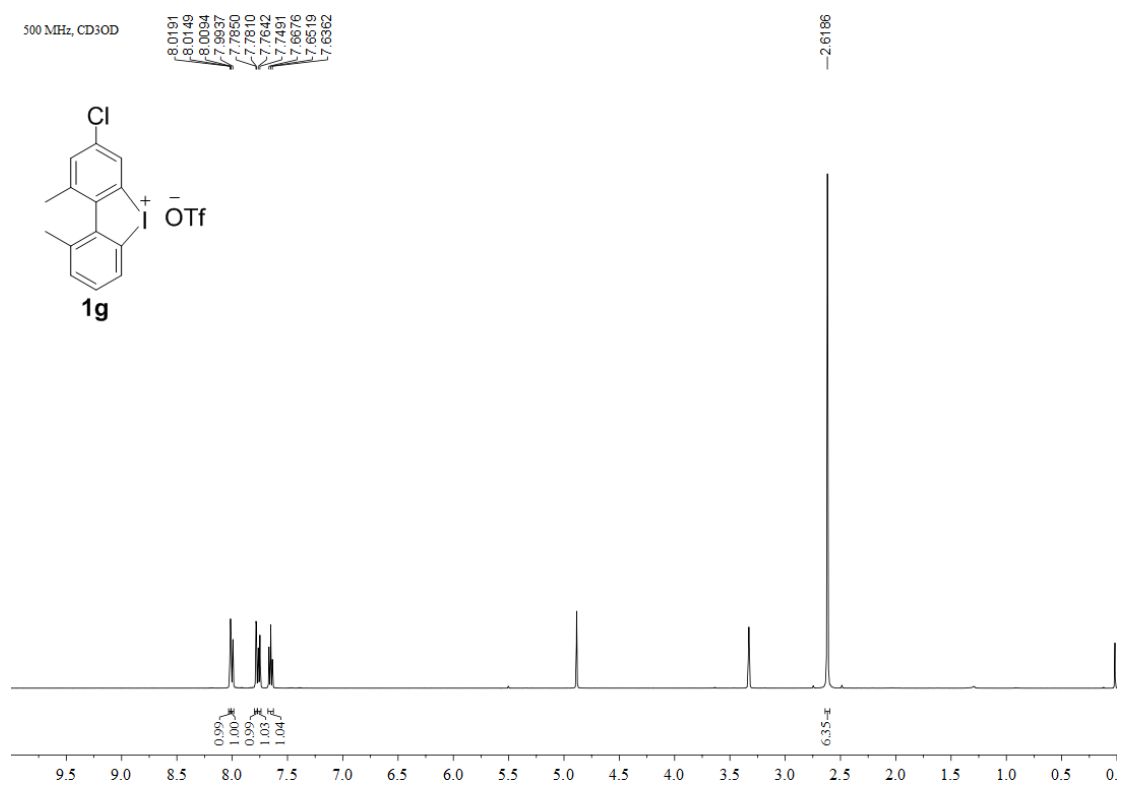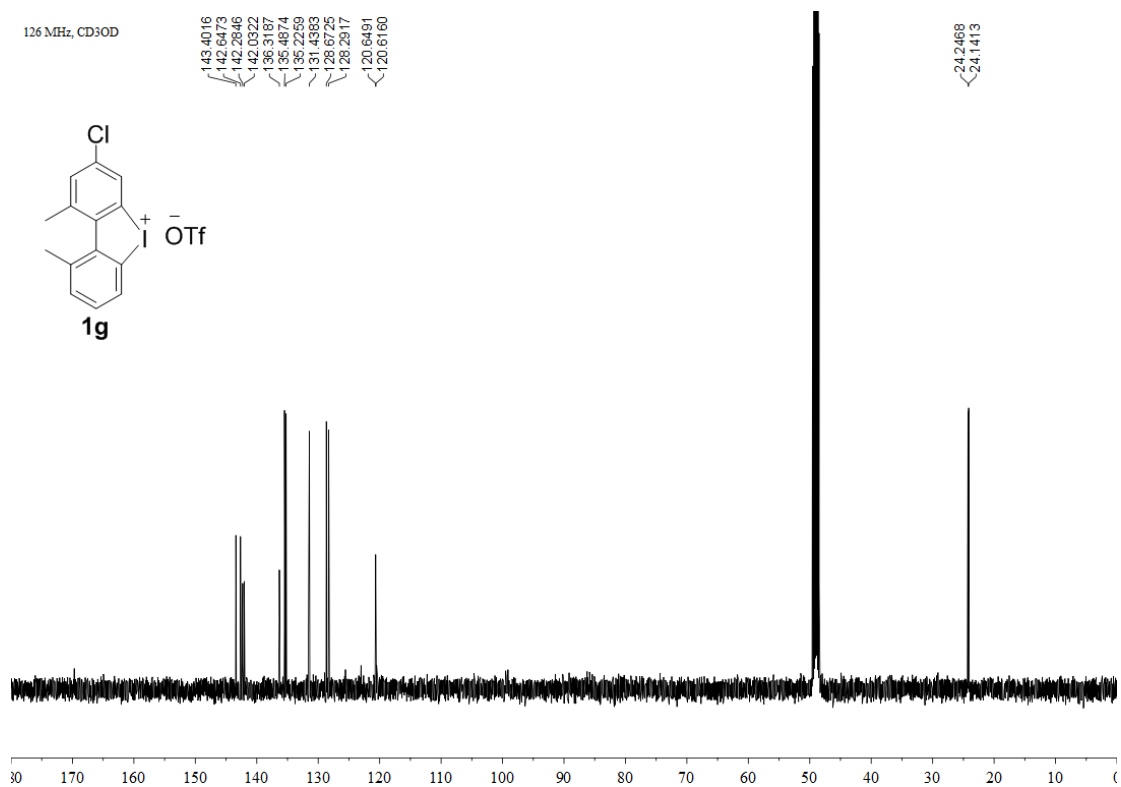

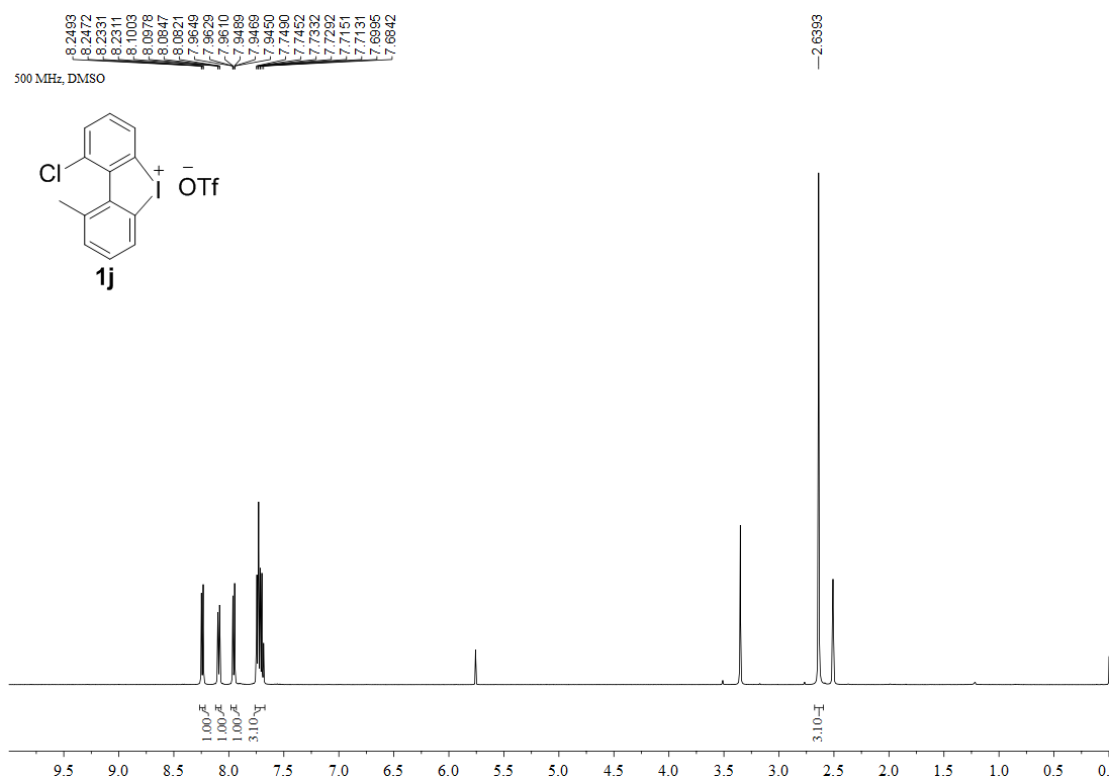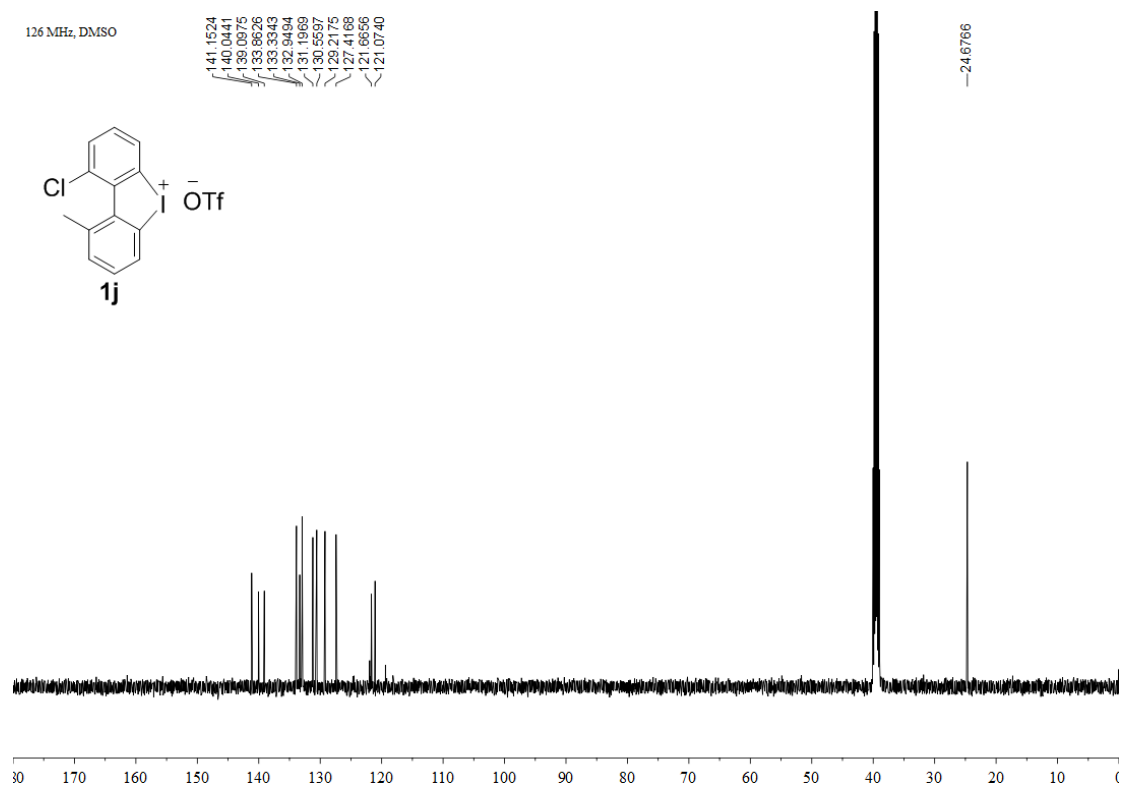



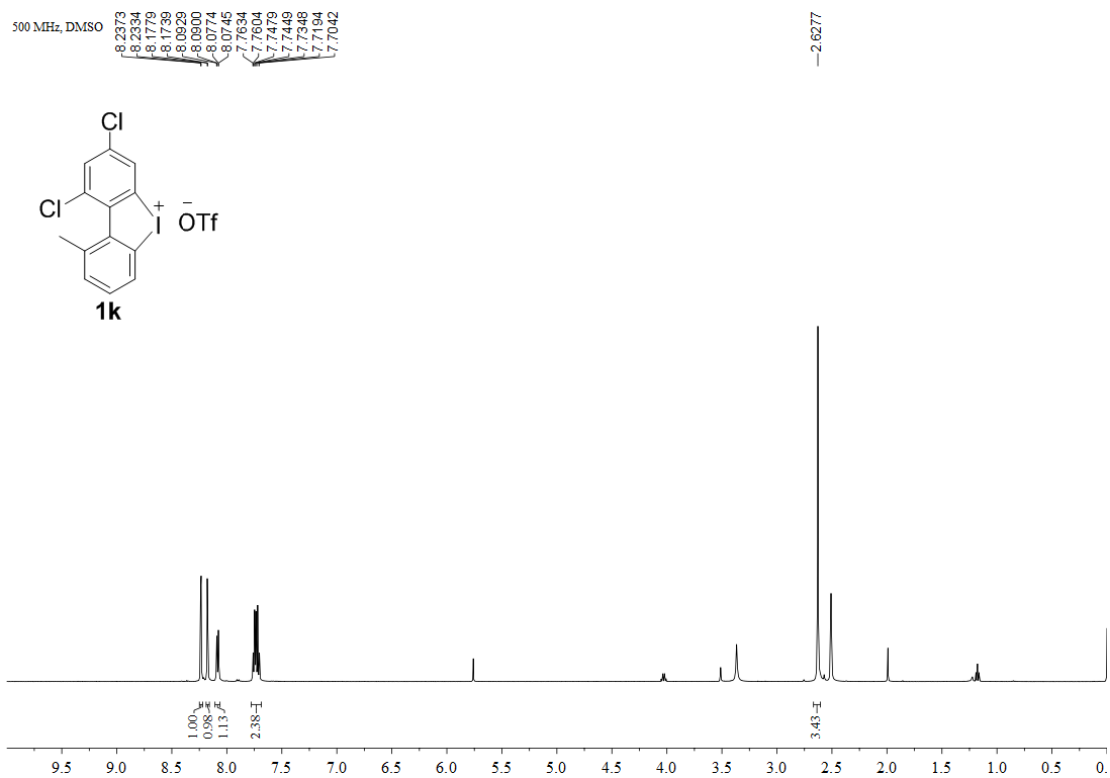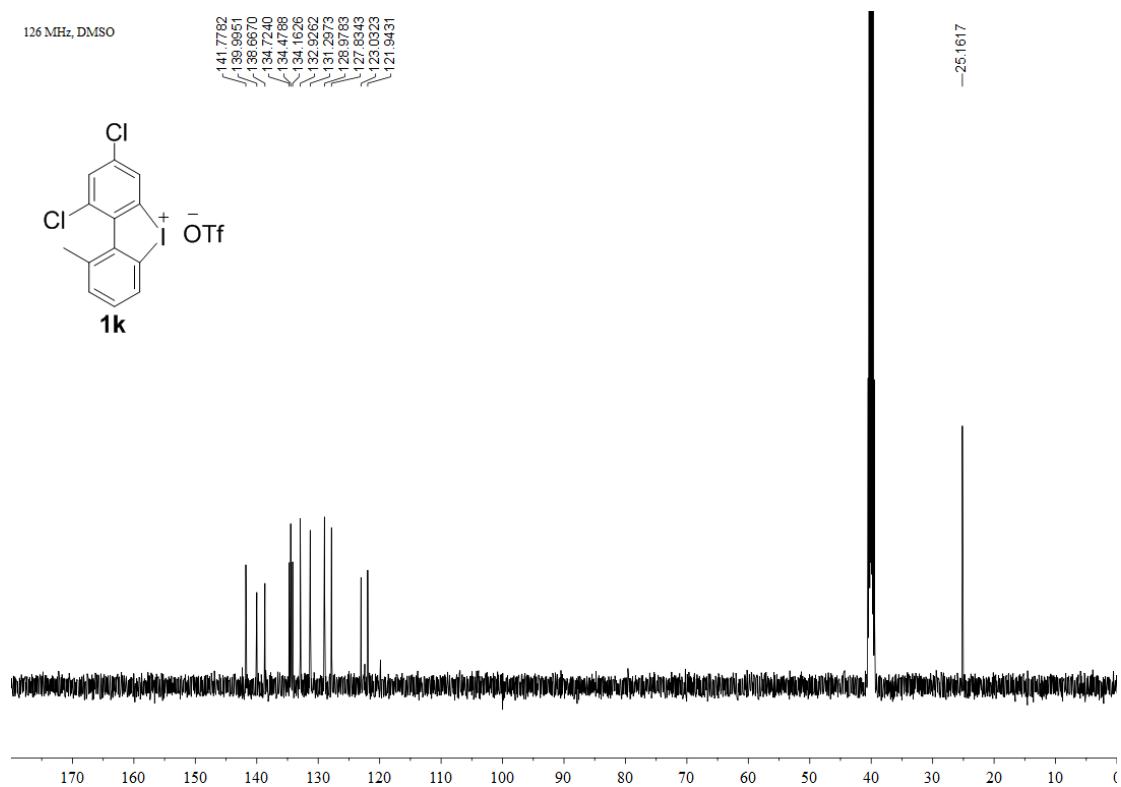

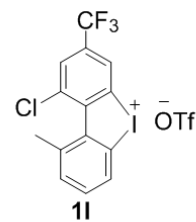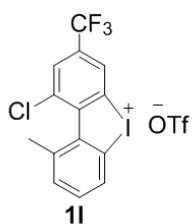

500 MHz, CDCl<sub>3</sub>

7.8359  
7.8209  
7.8188  
7.3081  
7.3062  
7.3043  
7.2923  
7.2909  
7.2891  
7.0410  
7.0255  
7.0101

2.0361

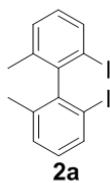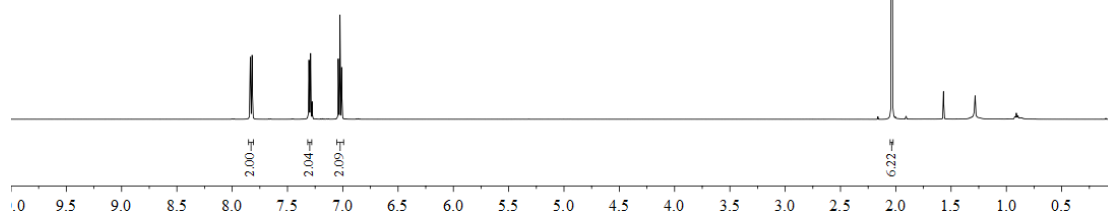

126 MHz, CDCl<sub>3</sub>

147.4536

137.5545

136.7737

130.0403

129.3942

100.6526

21.4027

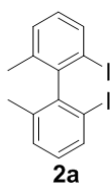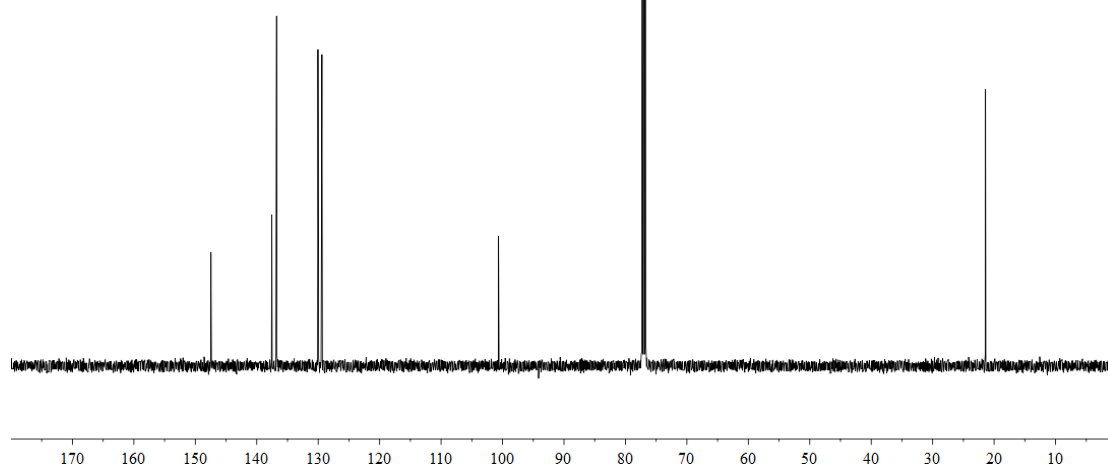

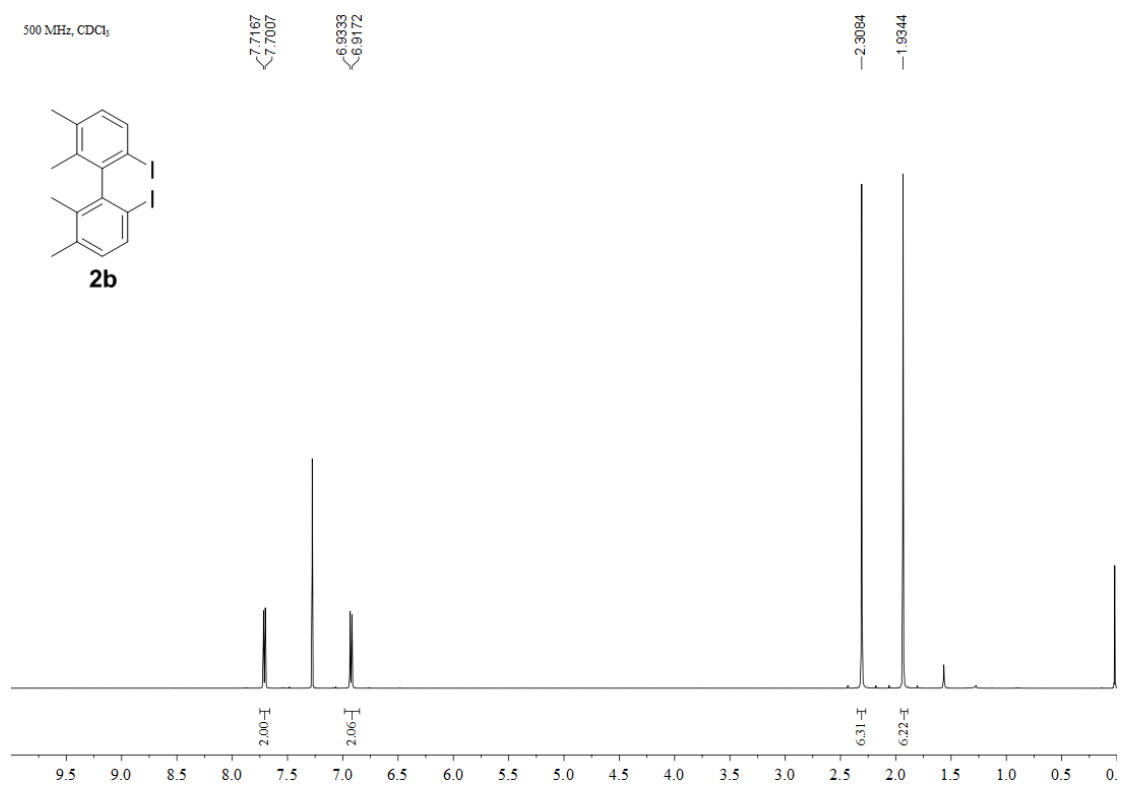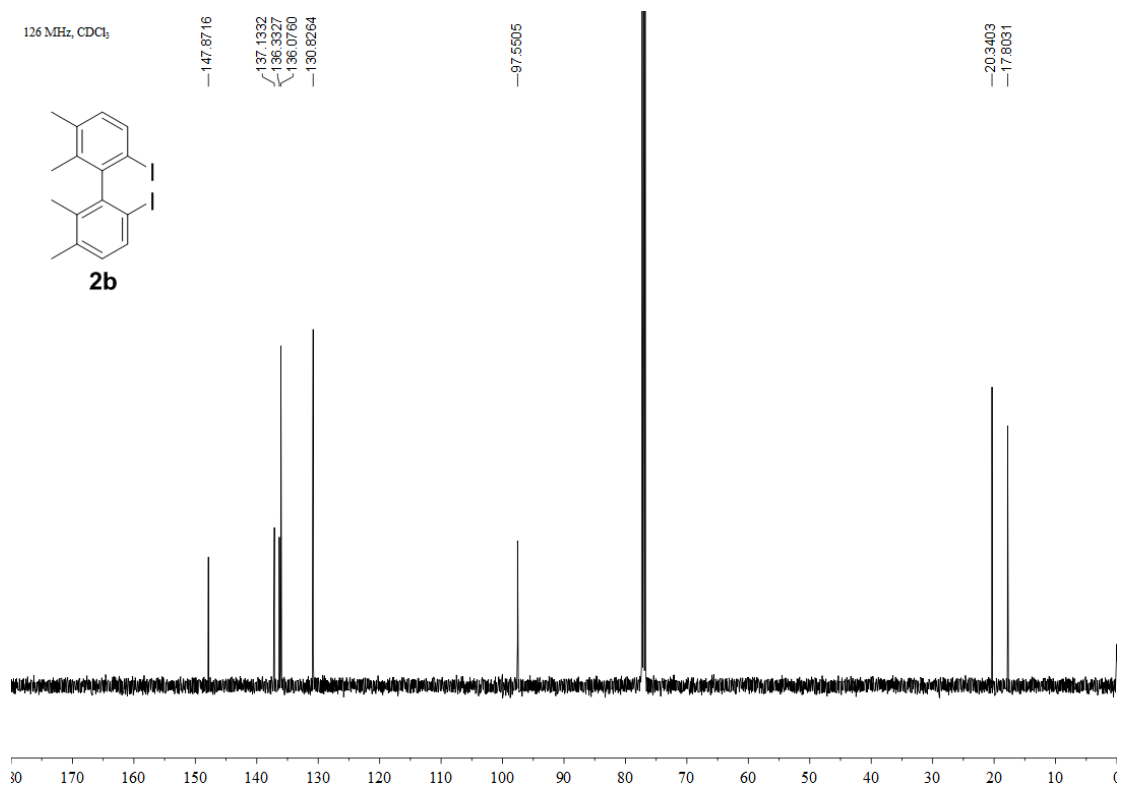

500 MHz, CDCl<sub>3</sub>

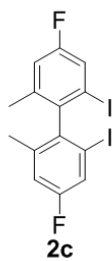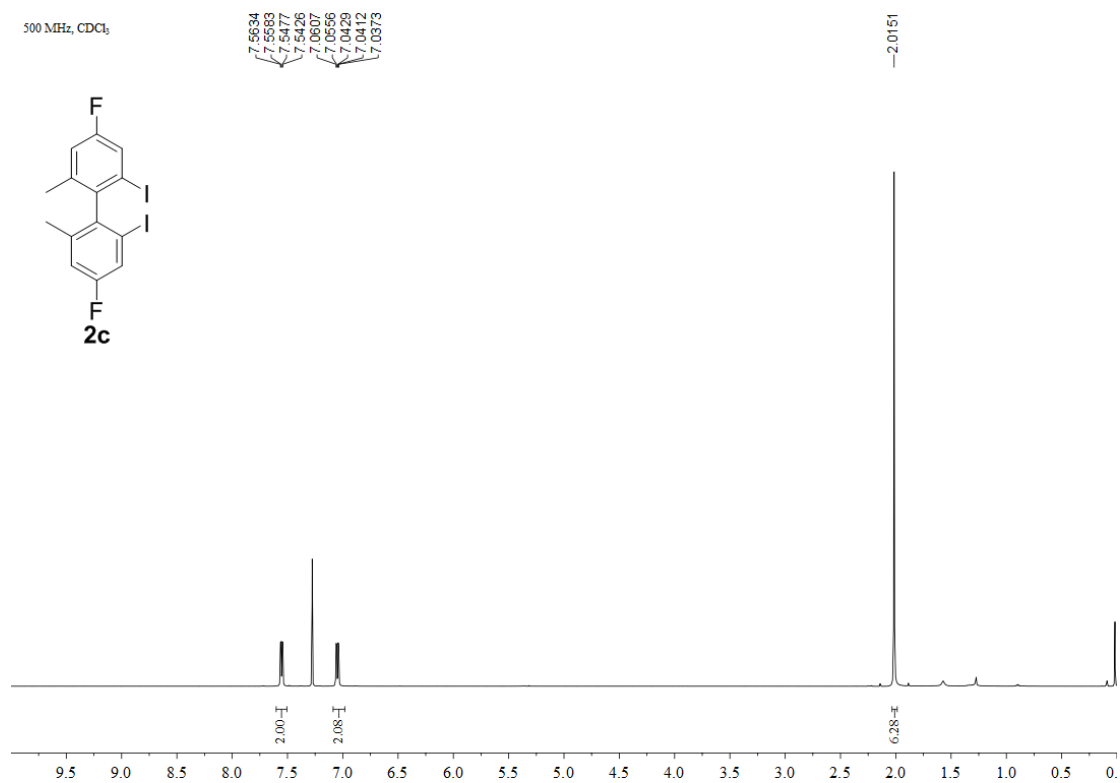

126 MHz, CDCl<sub>3</sub>

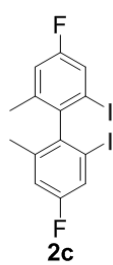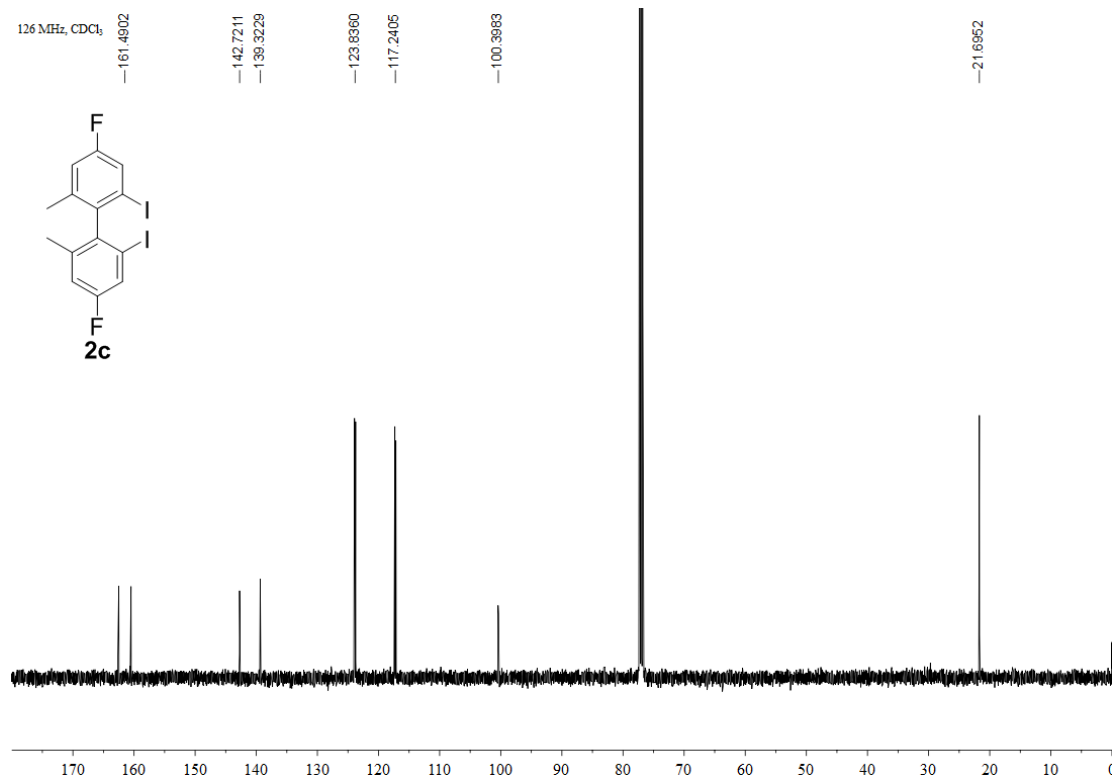

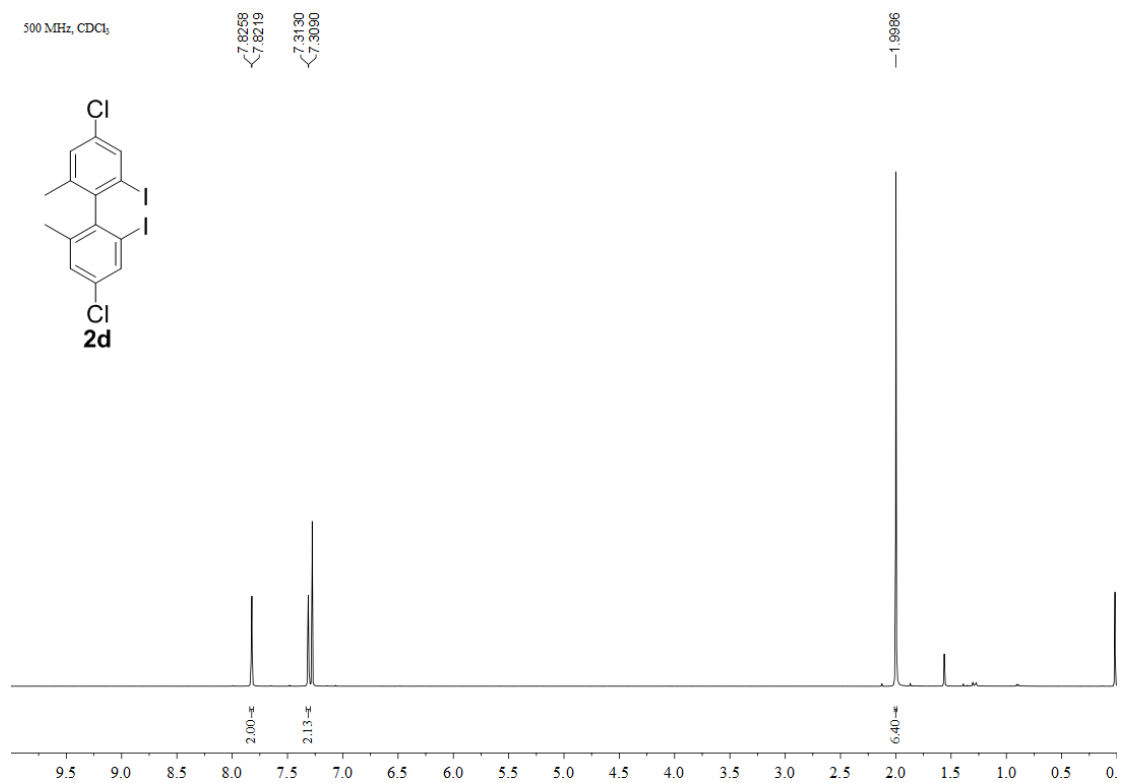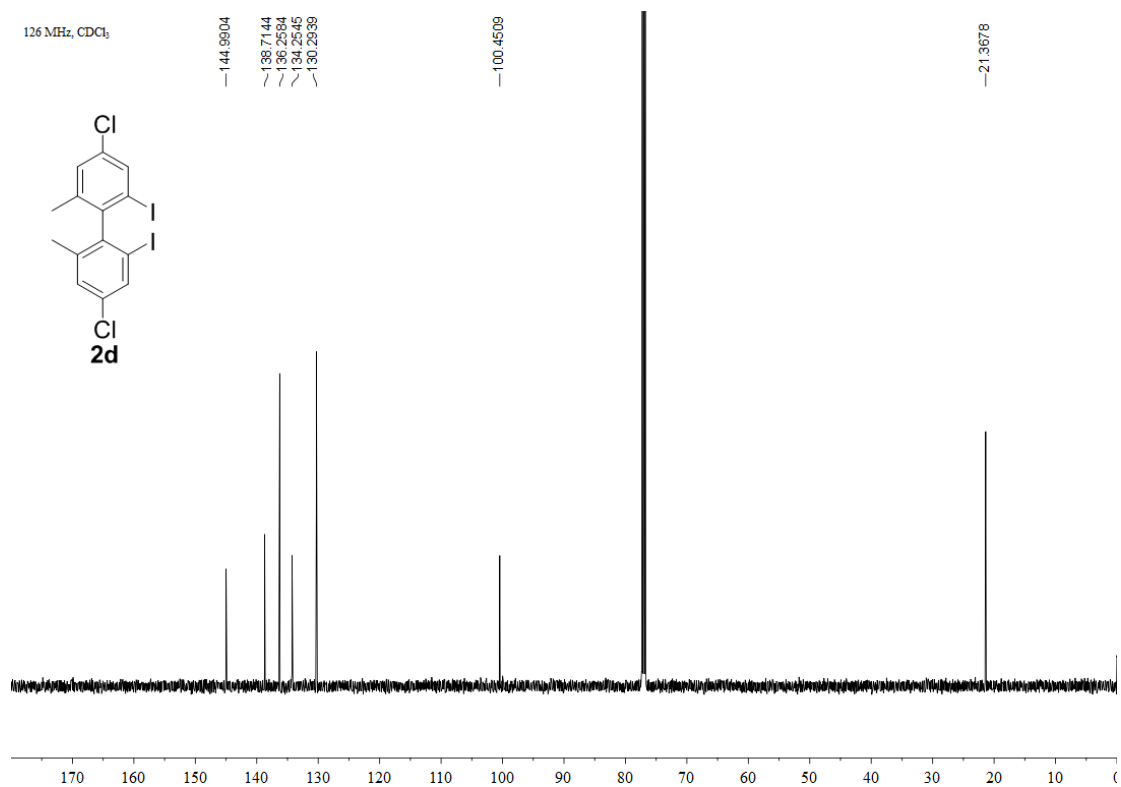

500 MHz, CDCl<sub>3</sub>

7.9082  
7.9061  
7.8923  
7.8901  
7.5360  
7.5339  
7.5199  
7.5178  
7.1071  
7.1051  
7.0810  
7.0891  
7.0791  
7.0731

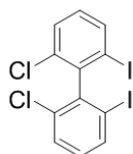

**2e**

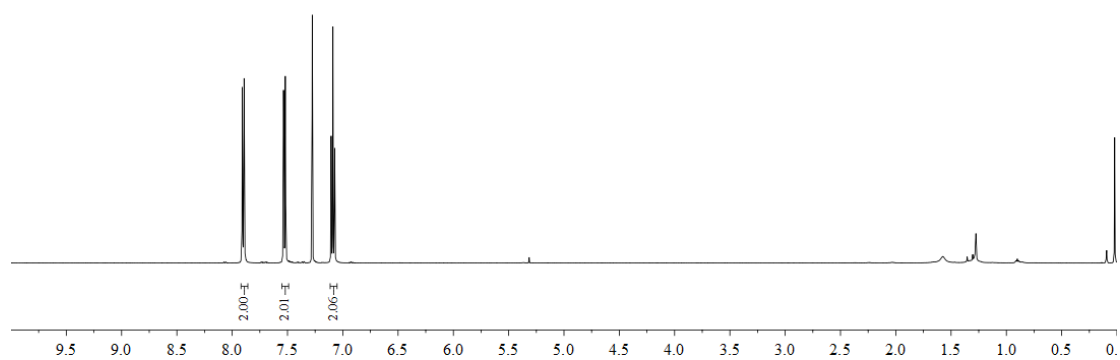

126 MHz, CDCl<sub>3</sub>

145.0951  
137.6317  
133.6938  
130.8626  
129.4952  
100.2197

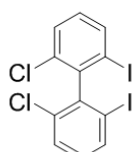

**2e**

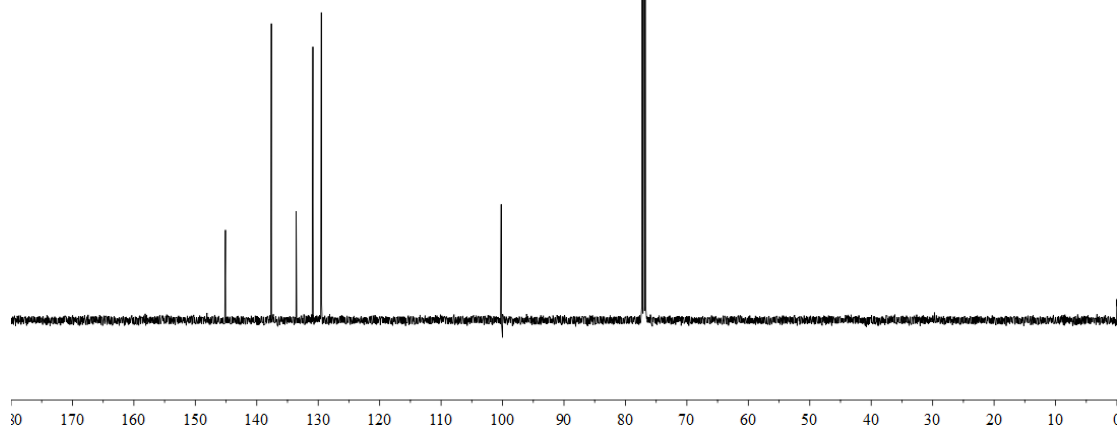

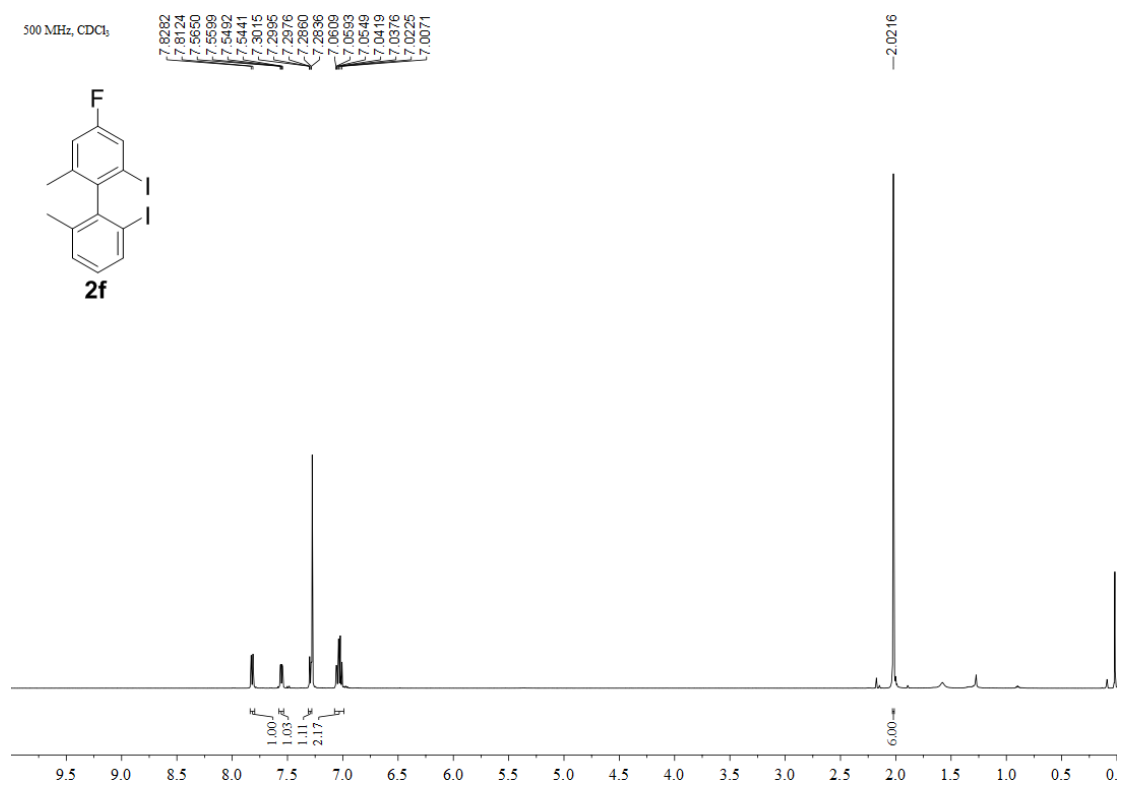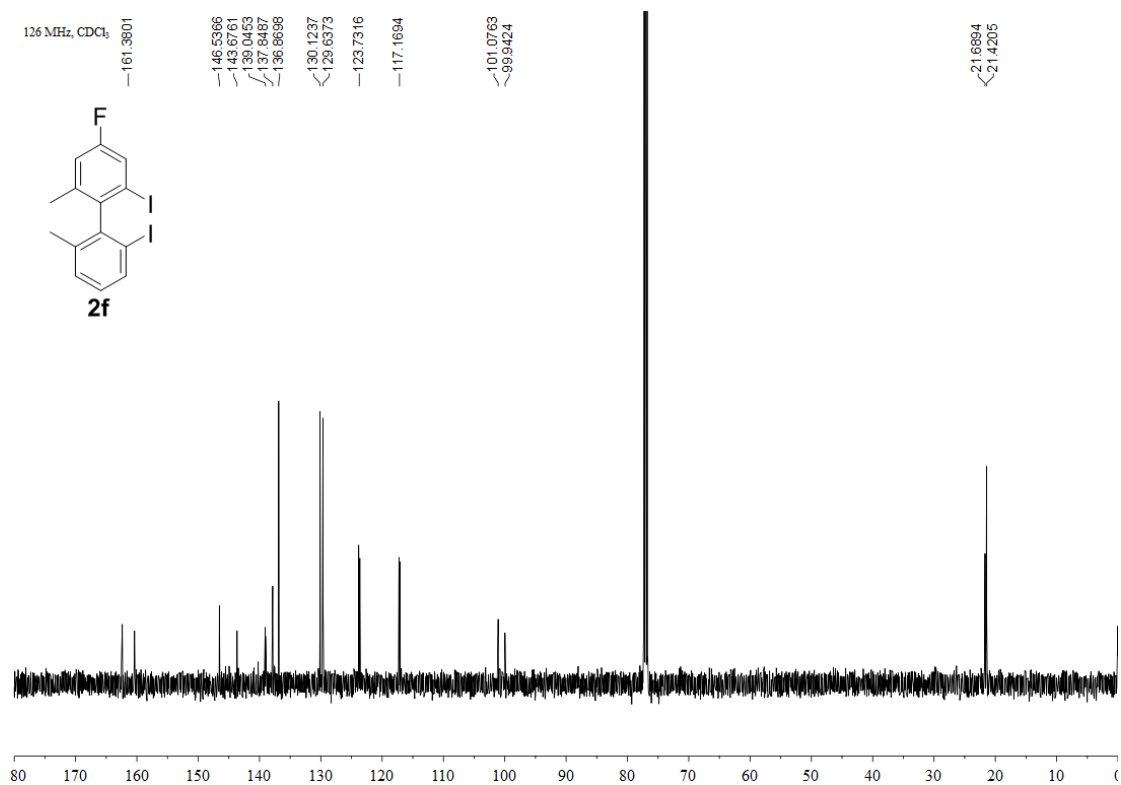



500 MHz, CDCl<sub>3</sub>

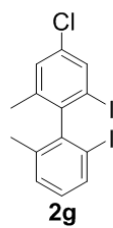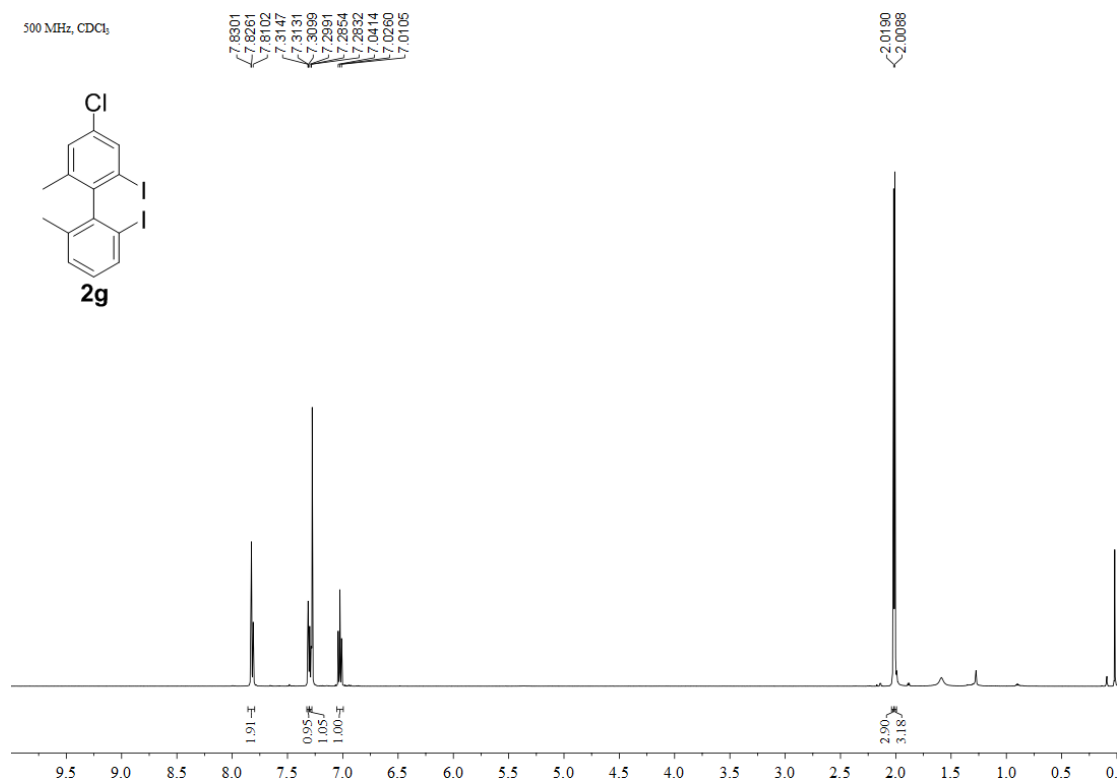

126 MHz, CDCl<sub>3</sub>

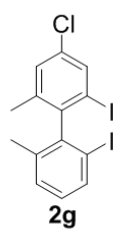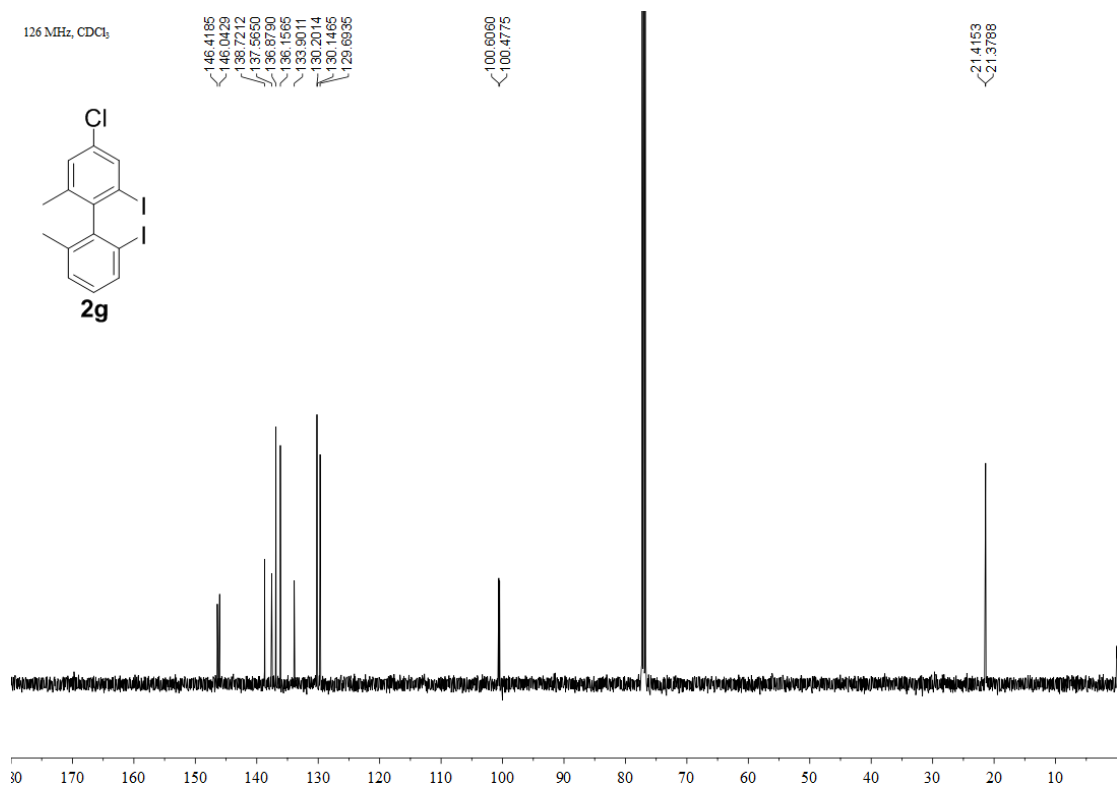

500 MHz, CDCl<sub>3</sub>

7.8333  
7.8175  
7.4184  
7.4022  
7.3081  
7.3062  
7.3043  
7.2908  
7.2508  
7.2492  
7.2346  
7.2329  
7.0431  
7.0276  
7.0121

2.0129  
1.9875

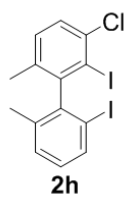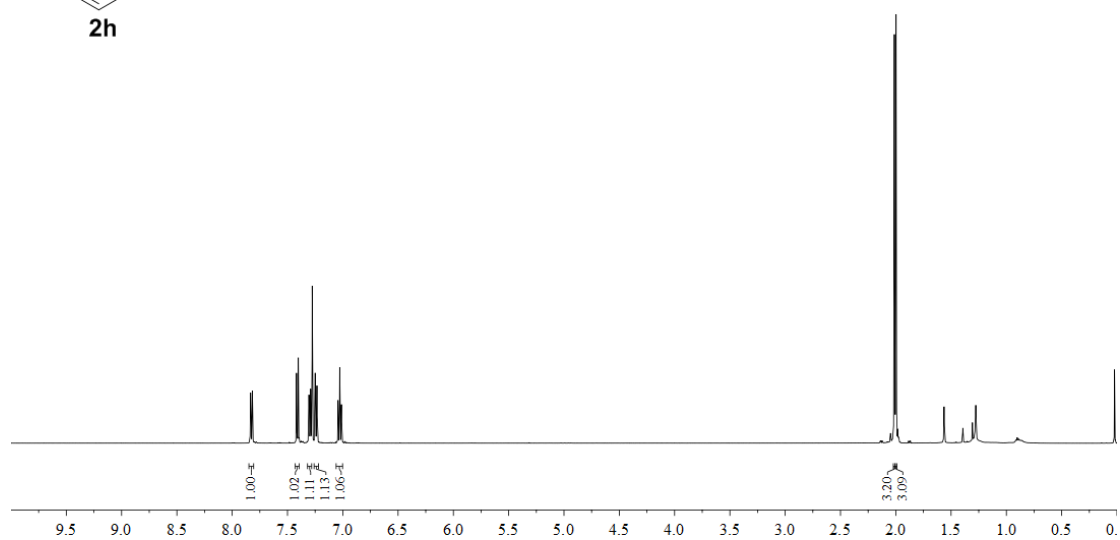

126 MHz, CDCl<sub>3</sub>

150.0298  
147.8829

137.2898  
136.6366  
136.8494  
135.3922  
131.1600  
130.1949  
129.5745  
128.3198

104.7724  
100.2367

21.3168  
21.0456

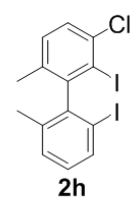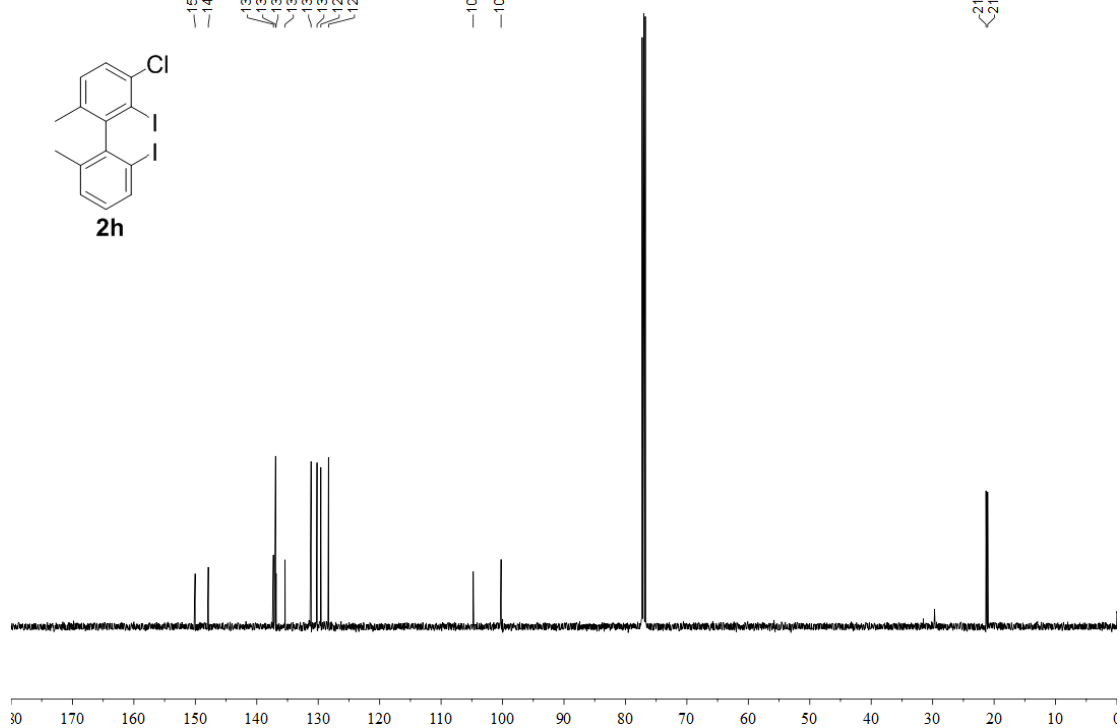

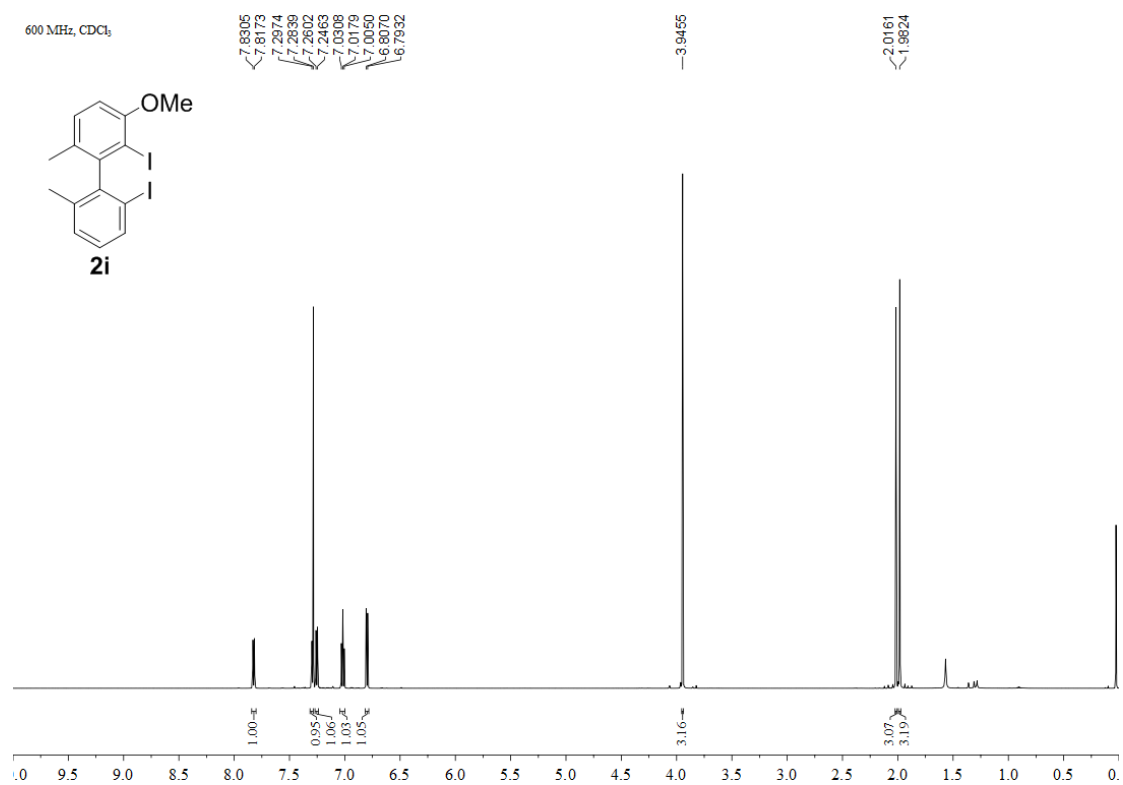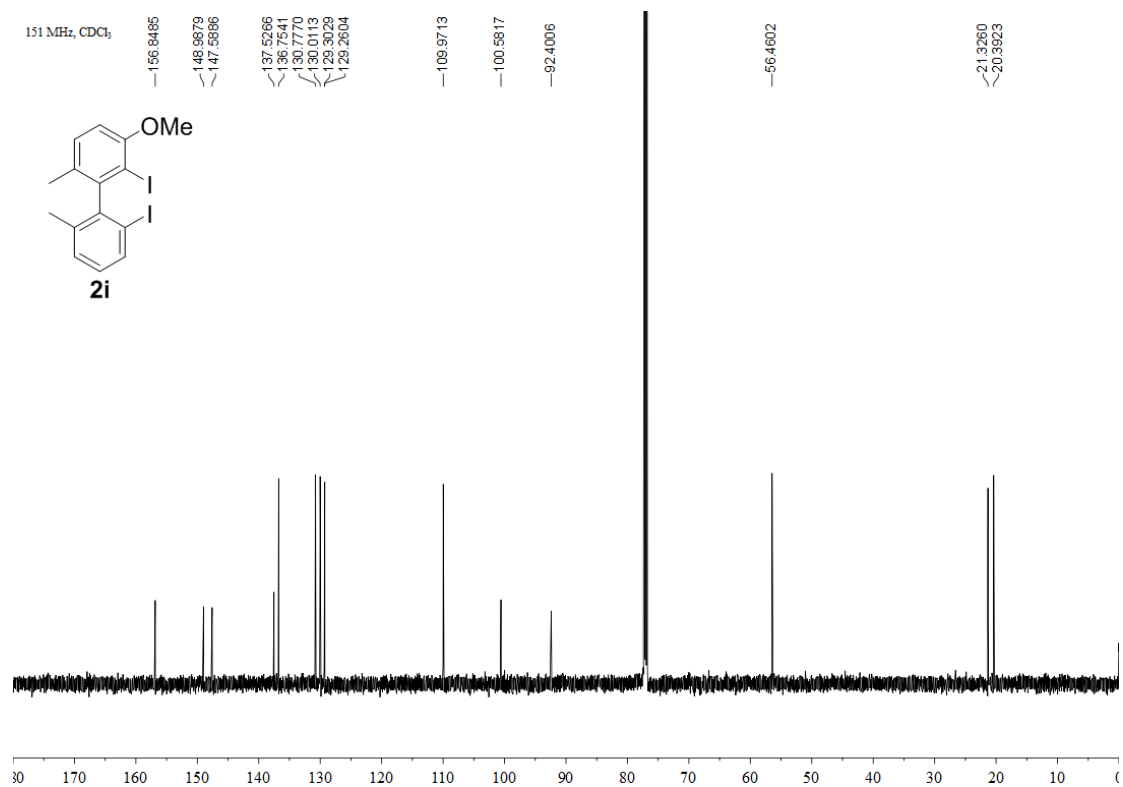

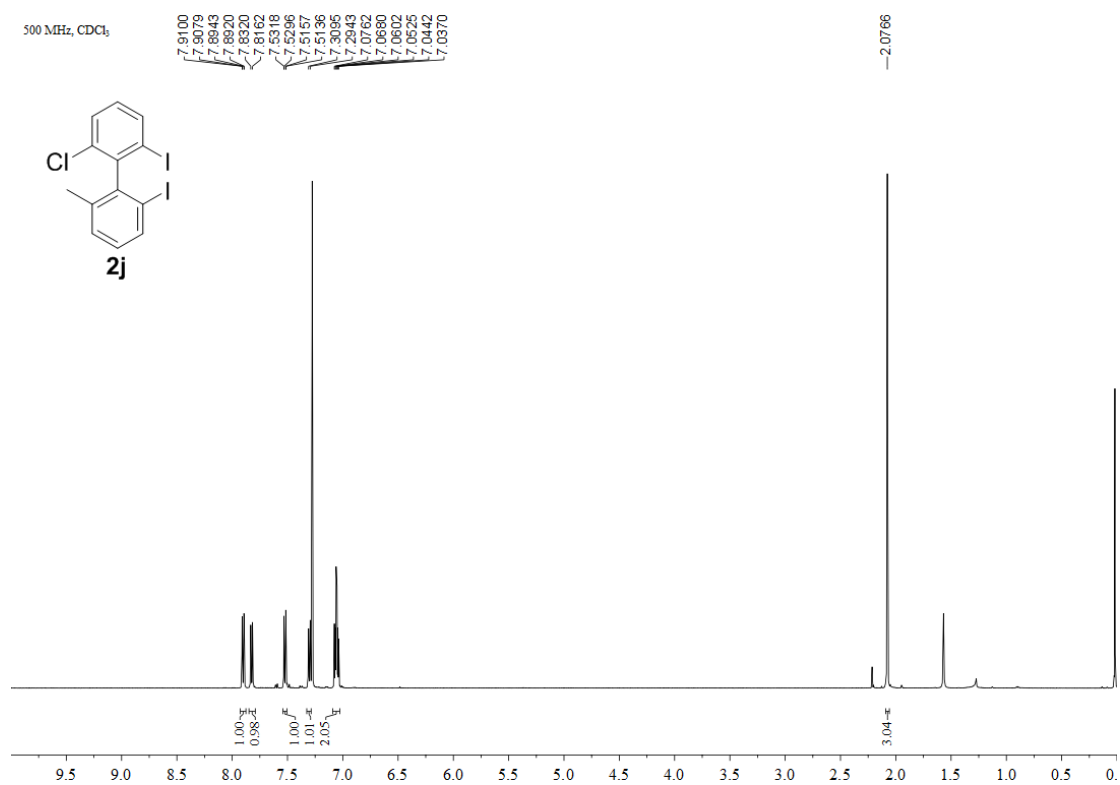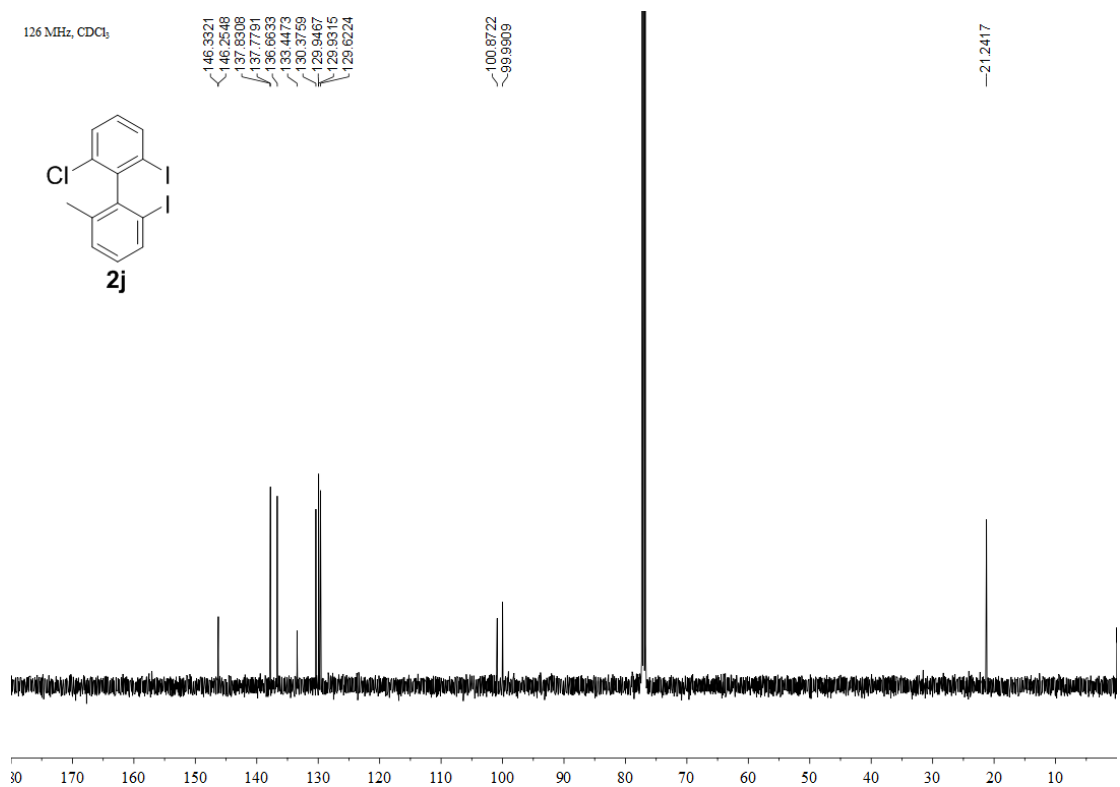

500 MHz, CDCl<sub>3</sub>

7.9112  
7.9072  
7.8261  
7.8102  
7.5556  
7.5515  
7.3062  
7.2910  
7.0714  
7.0558  
7.0403

2.0674

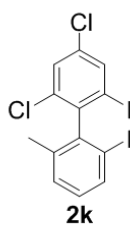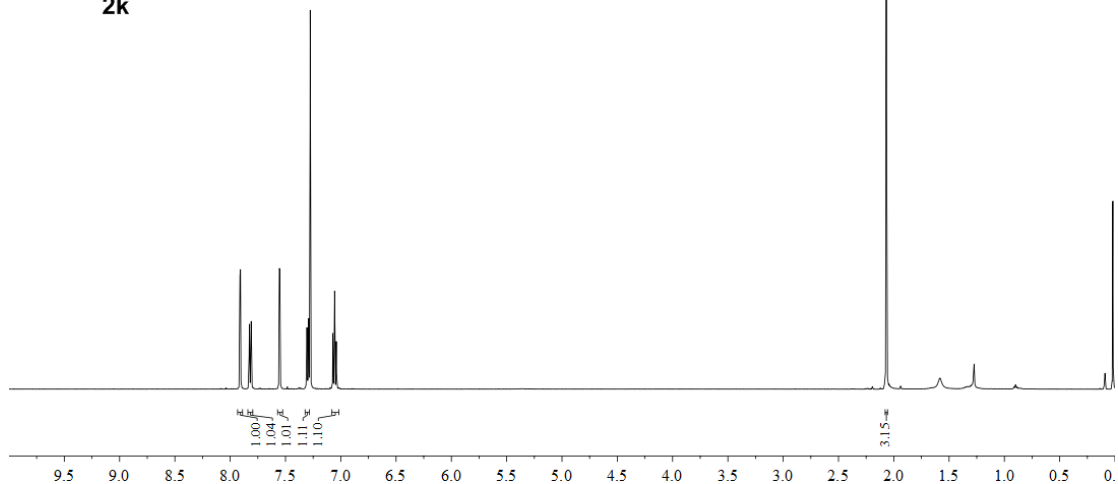

126 MHz, CDCl<sub>3</sub>

145.3128  
145.0059  
137.8404  
137.4036  
136.7415  
134.7938  
133.6622  
130.2081  
130.0144  
129.6688

100.7086  
99.8714

21.2193

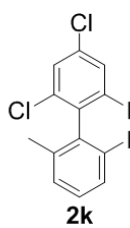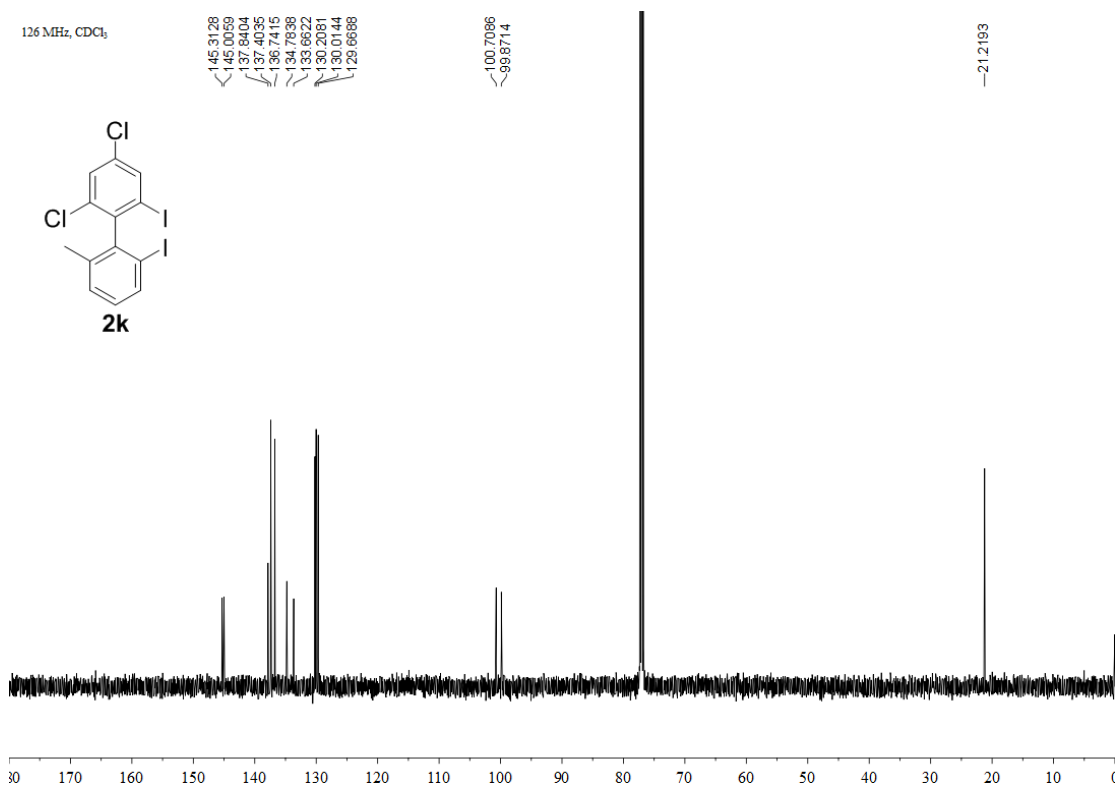

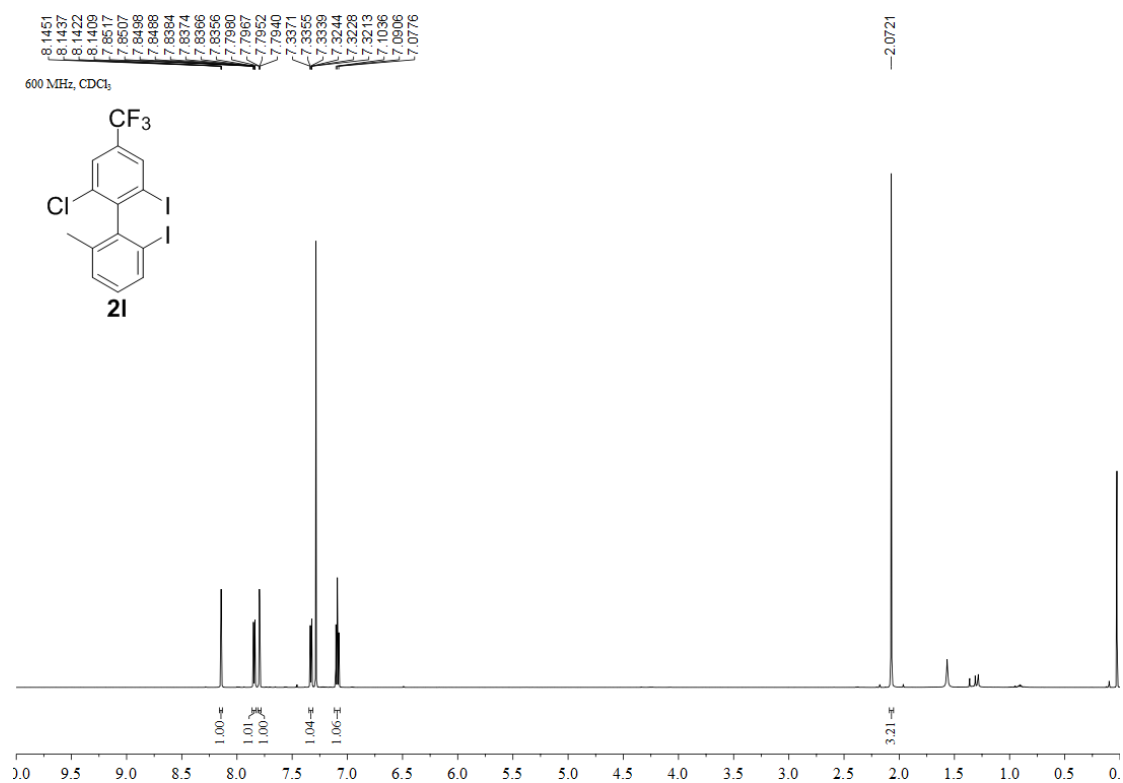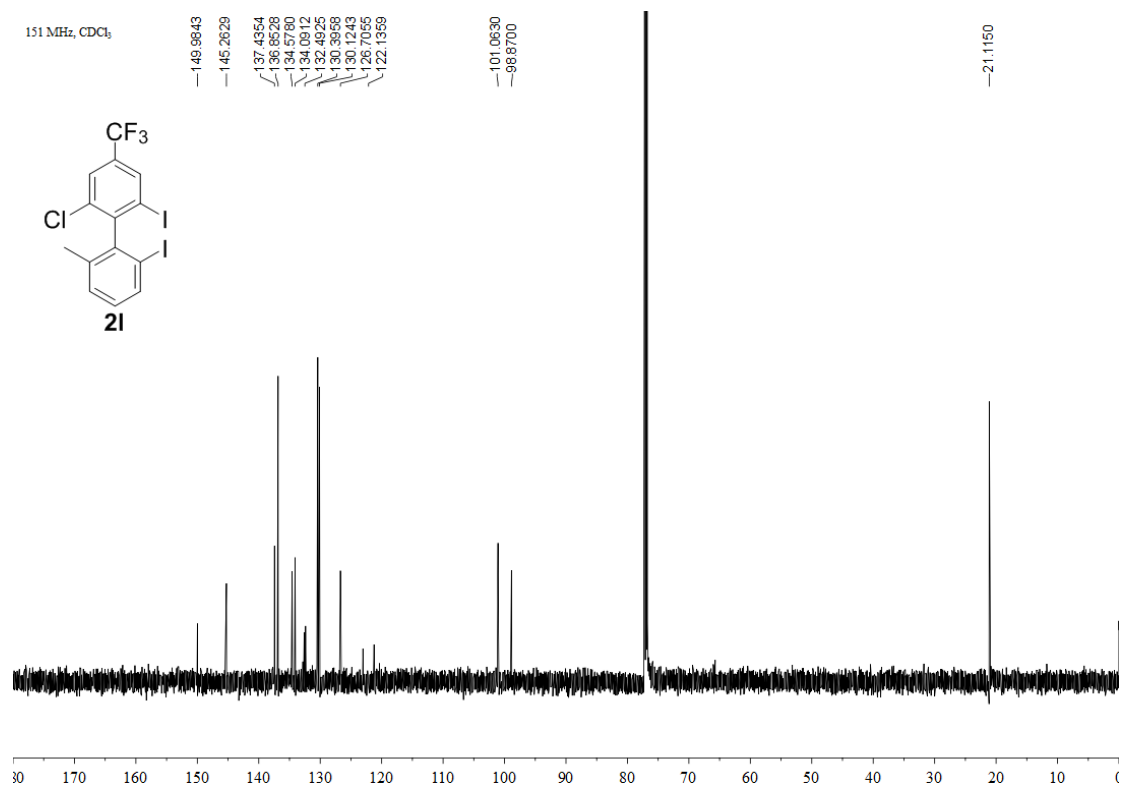

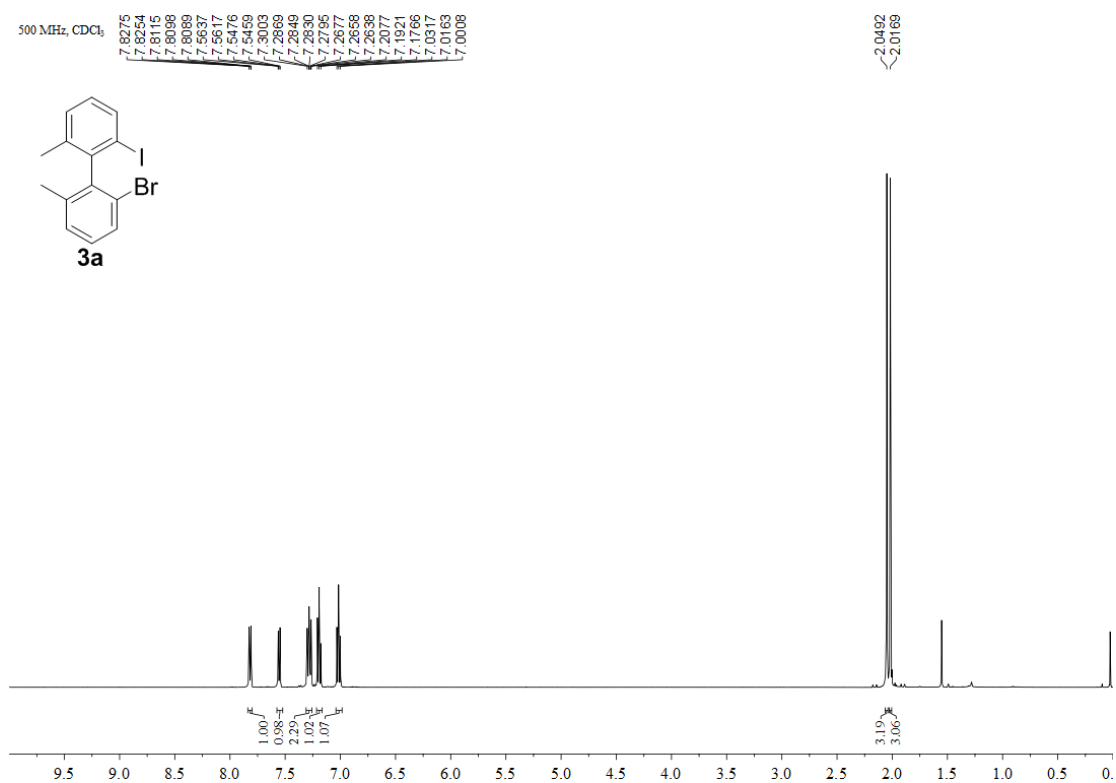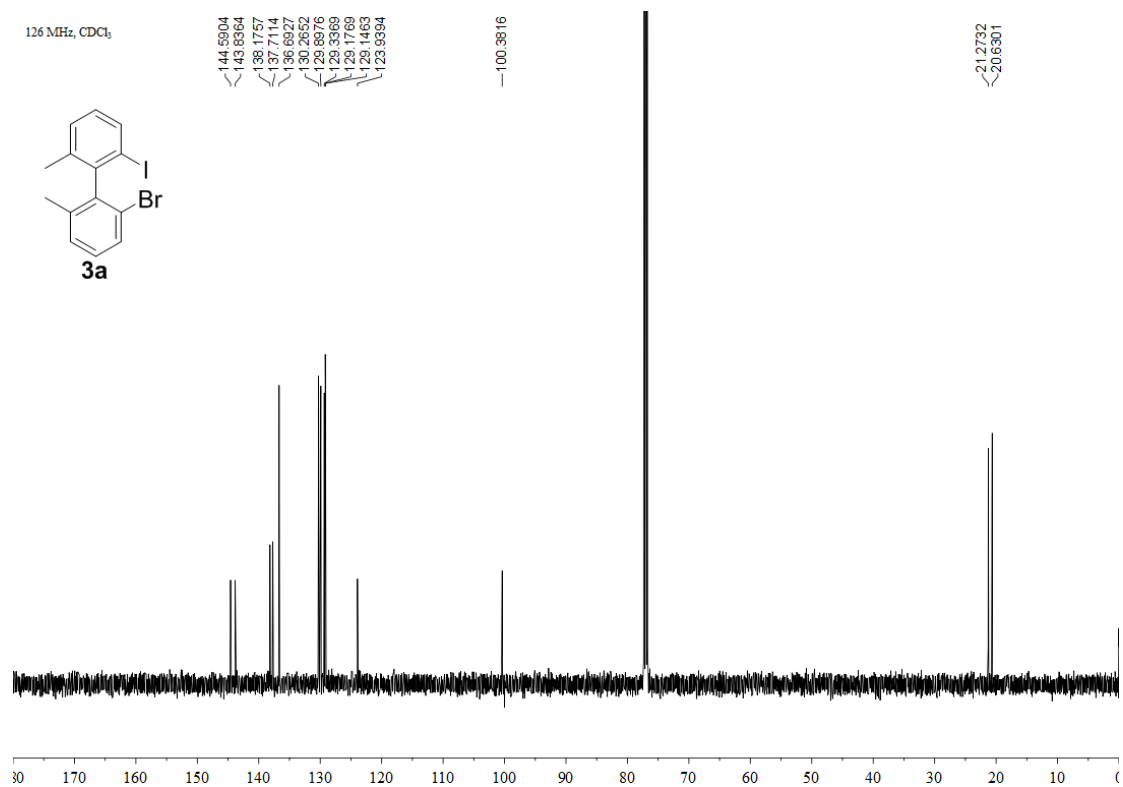

500 MHz, CDCl<sub>3</sub>

7.7120  
7.6960  
7.4509  
7.4347  
7.0903  
7.0740  
6.9305  
6.9145

2.3111  
1.9497  
1.9063

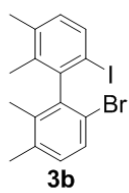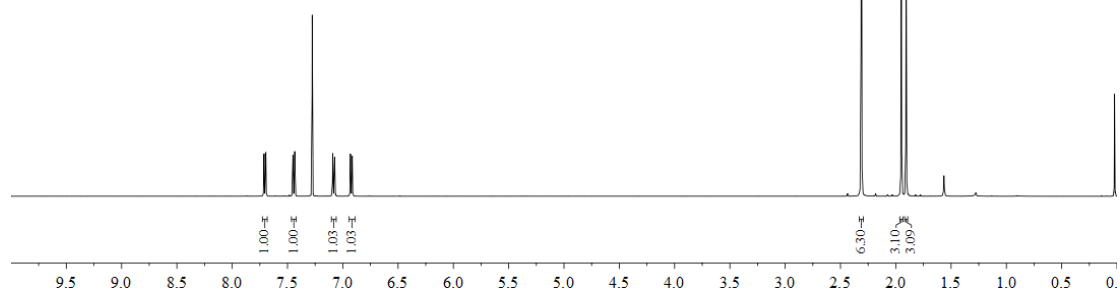

126 MHz, CDCl<sub>3</sub>

144.9318  
144.2959  
136.9898  
136.7506  
136.4653  
136.2081  
136.0017  
130.7857  
130.4962  
129.5909  
121.2822

97.2745

20.3486  
20.3274  
17.7024  
17.1093

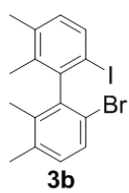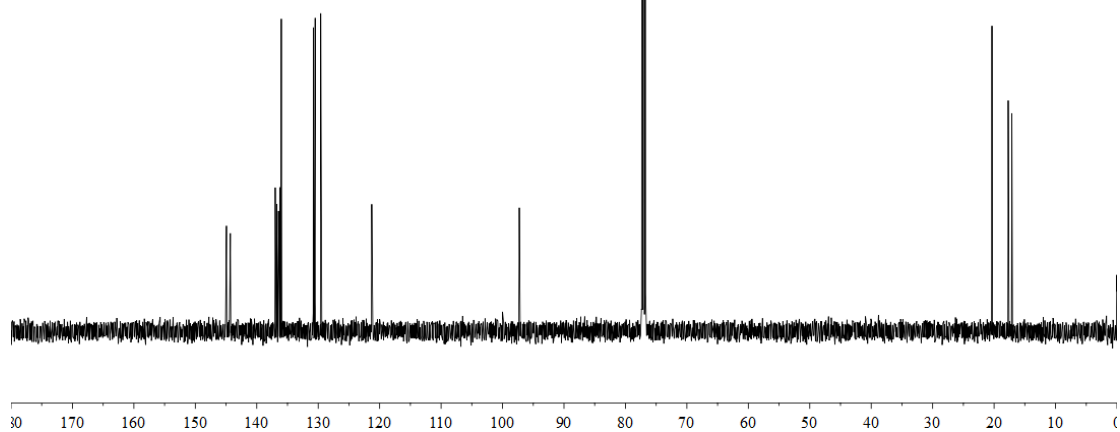



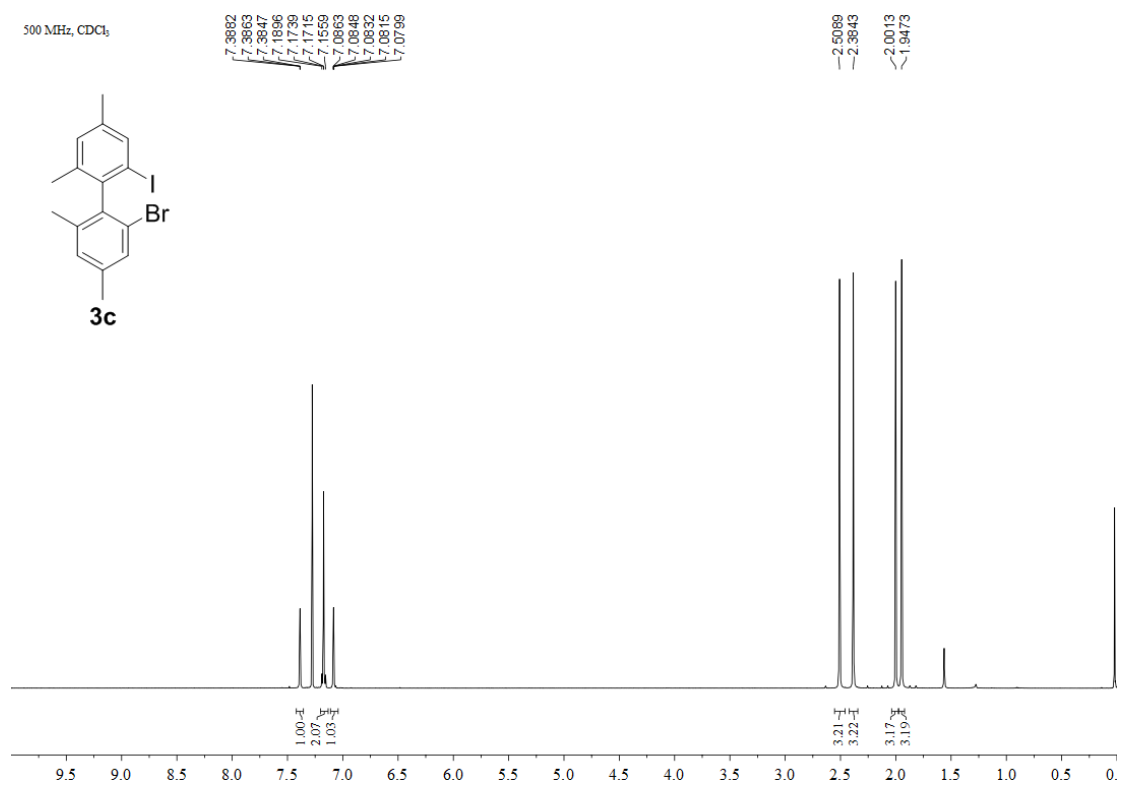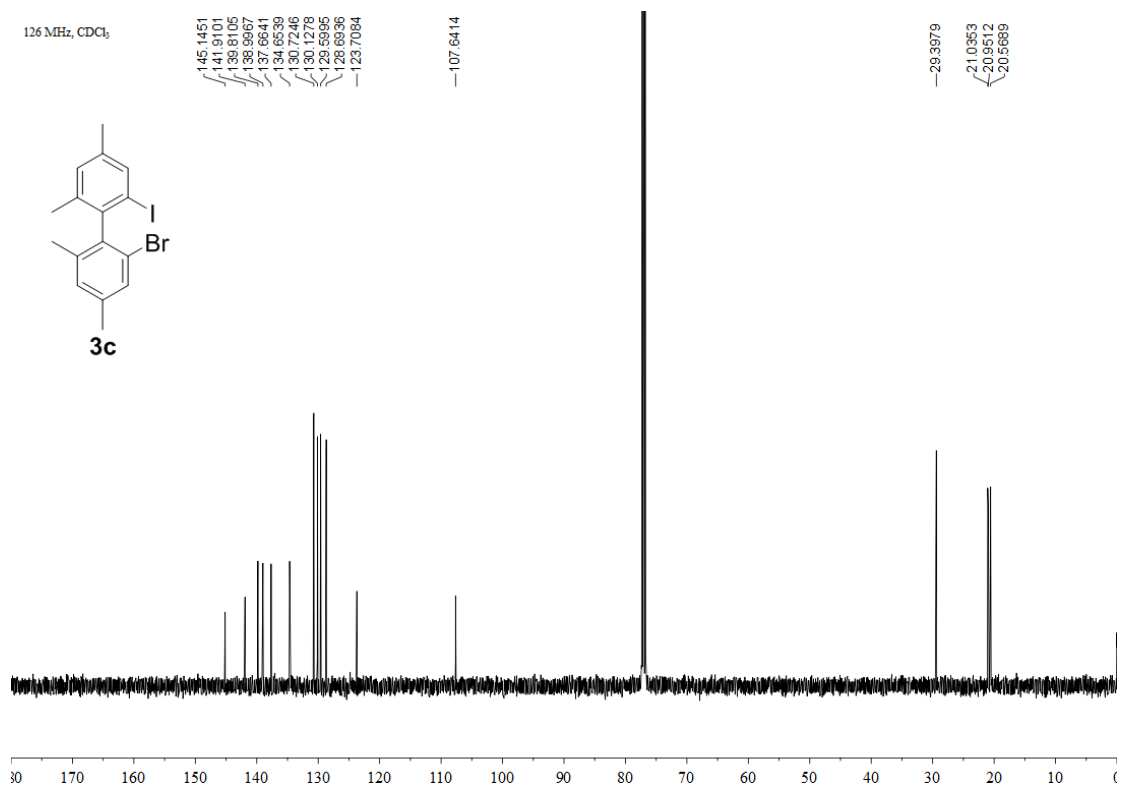

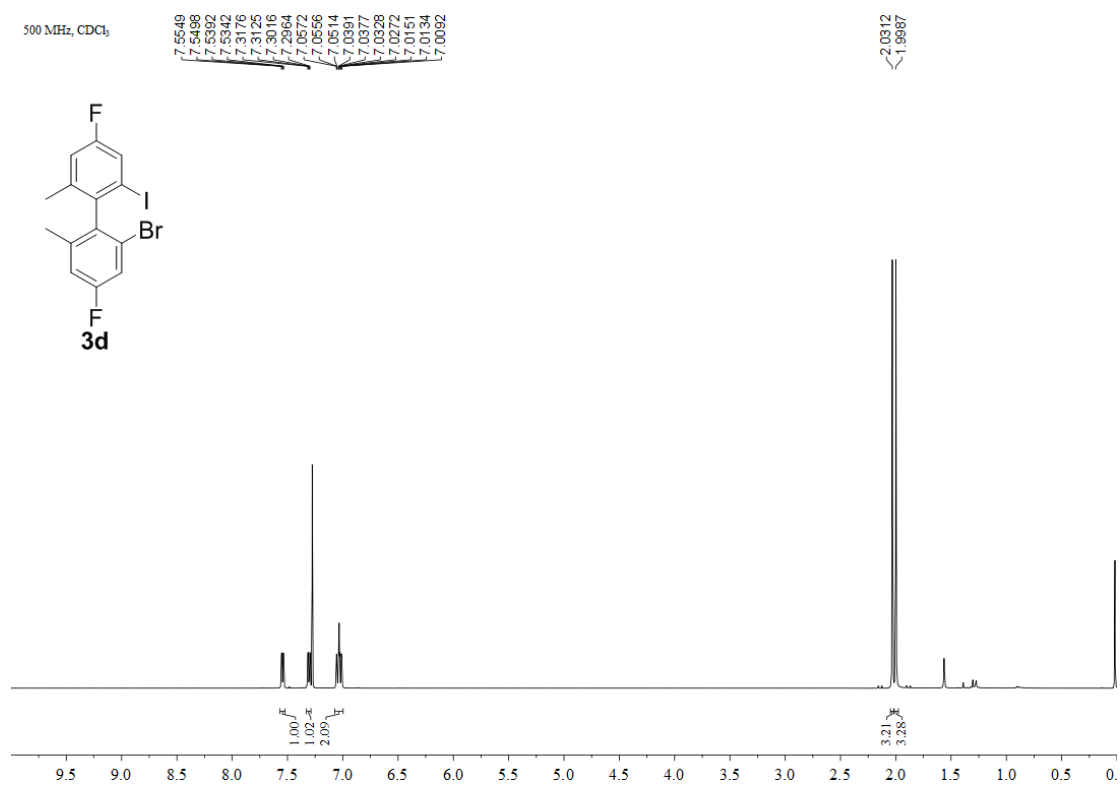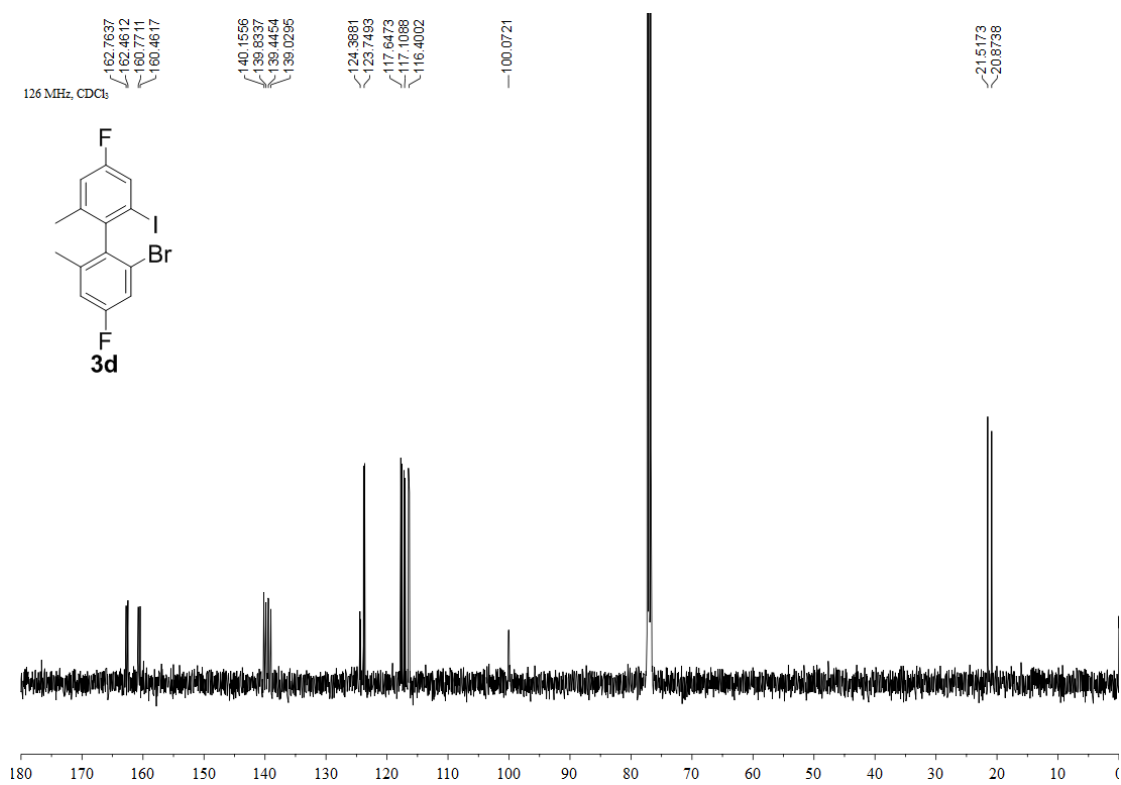

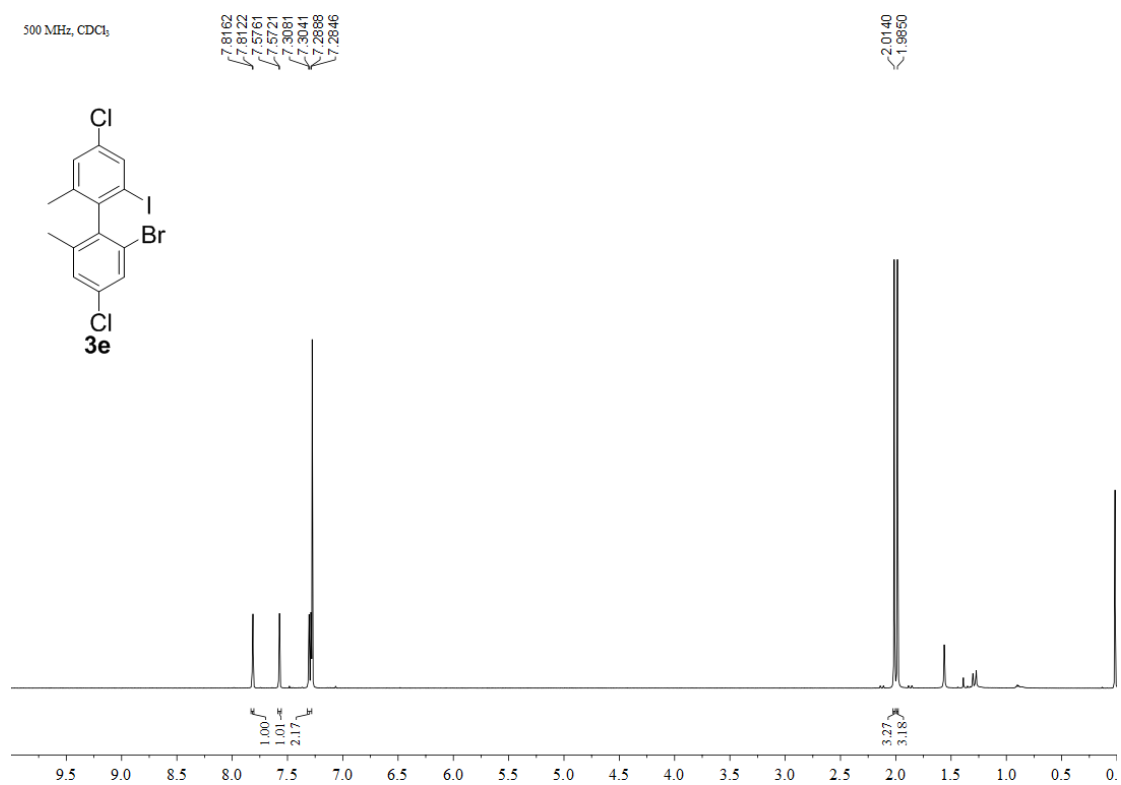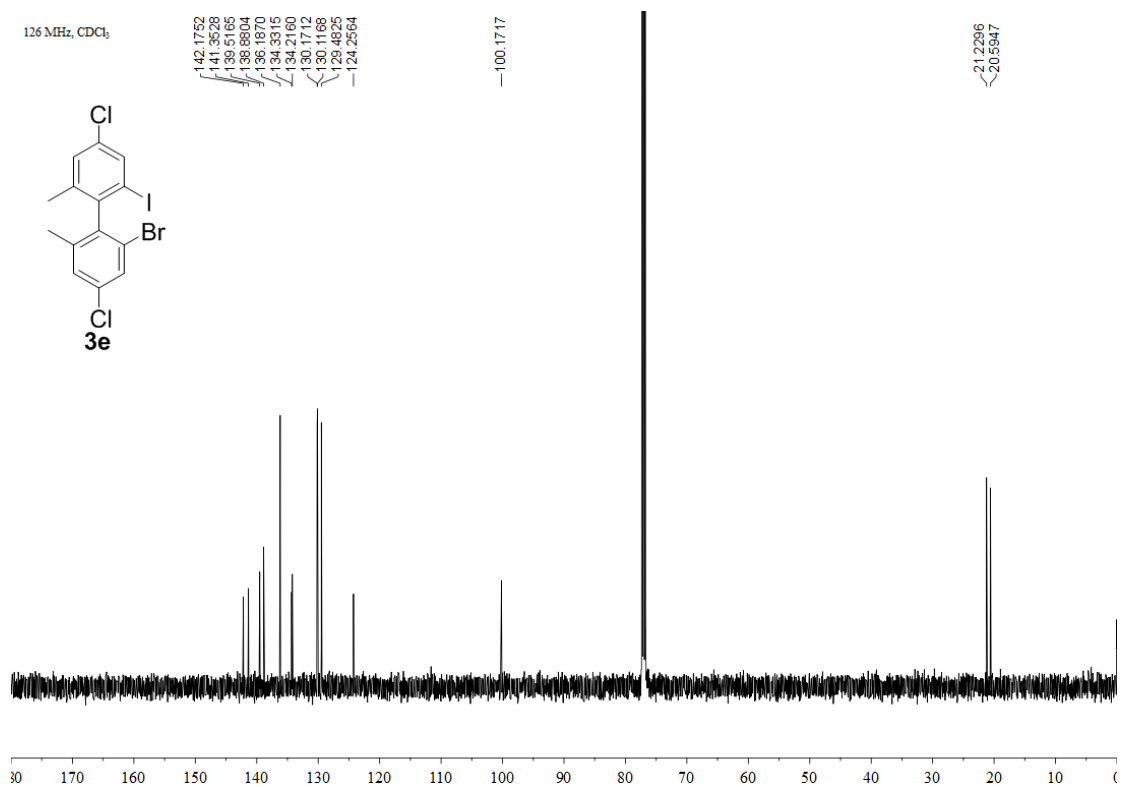

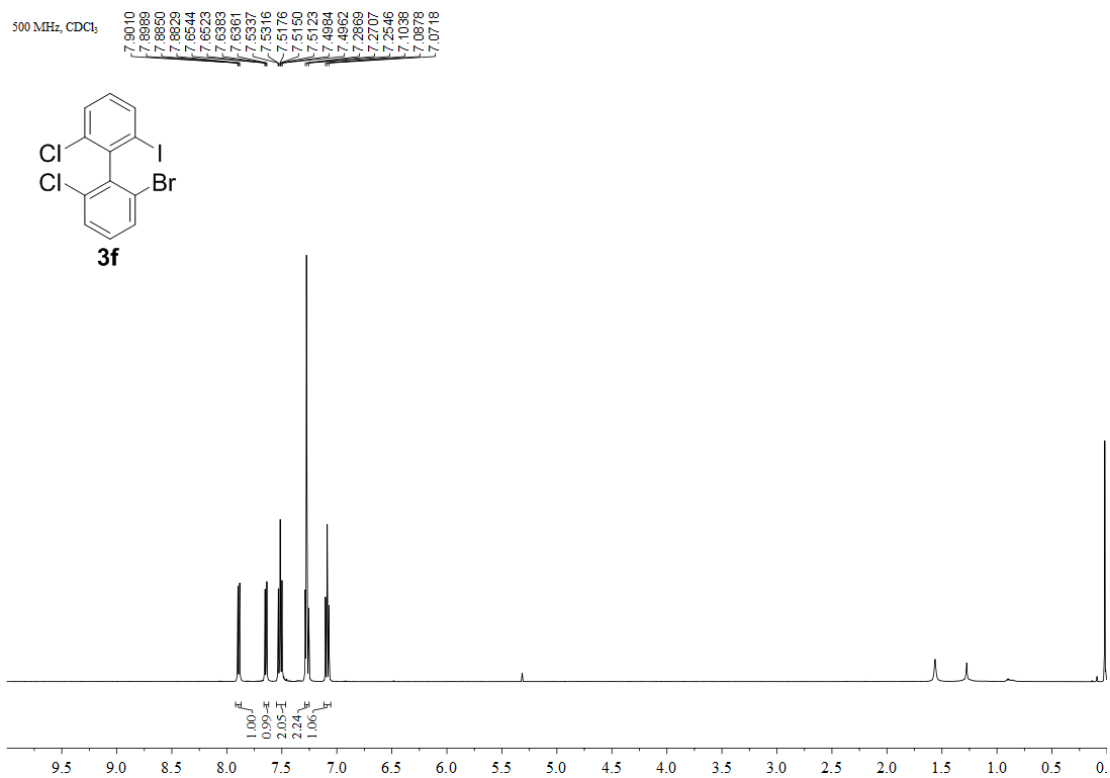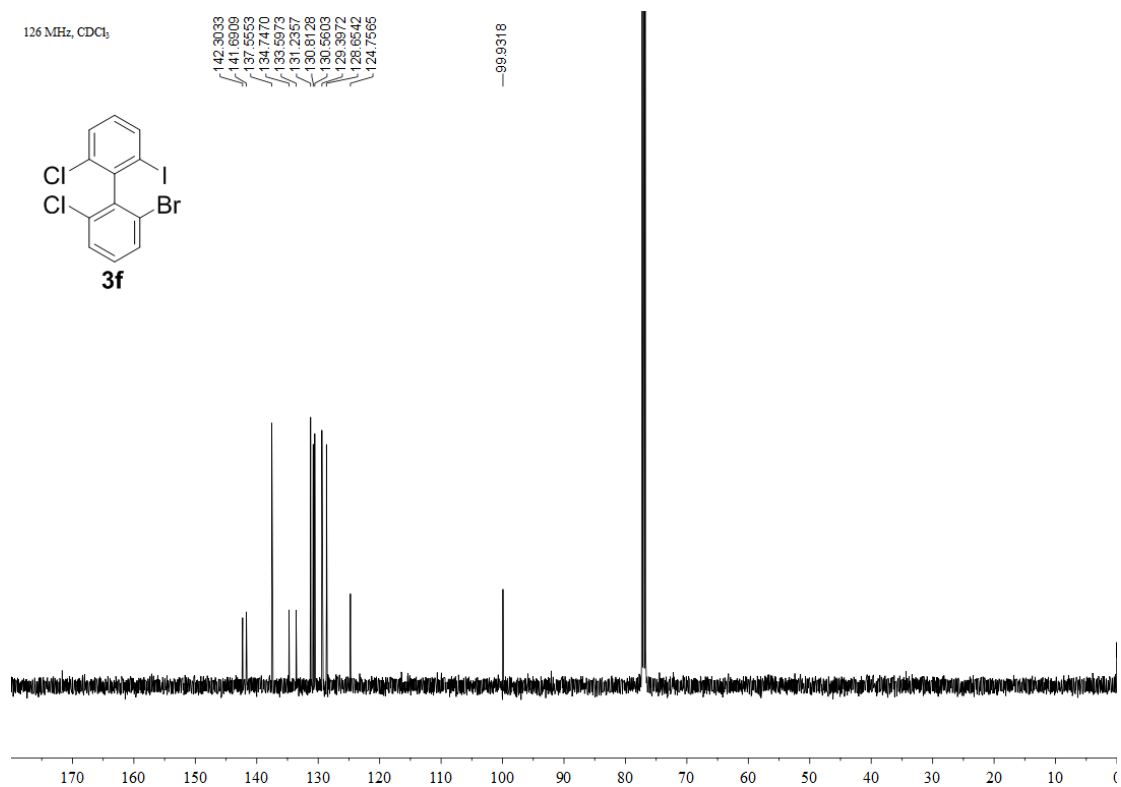

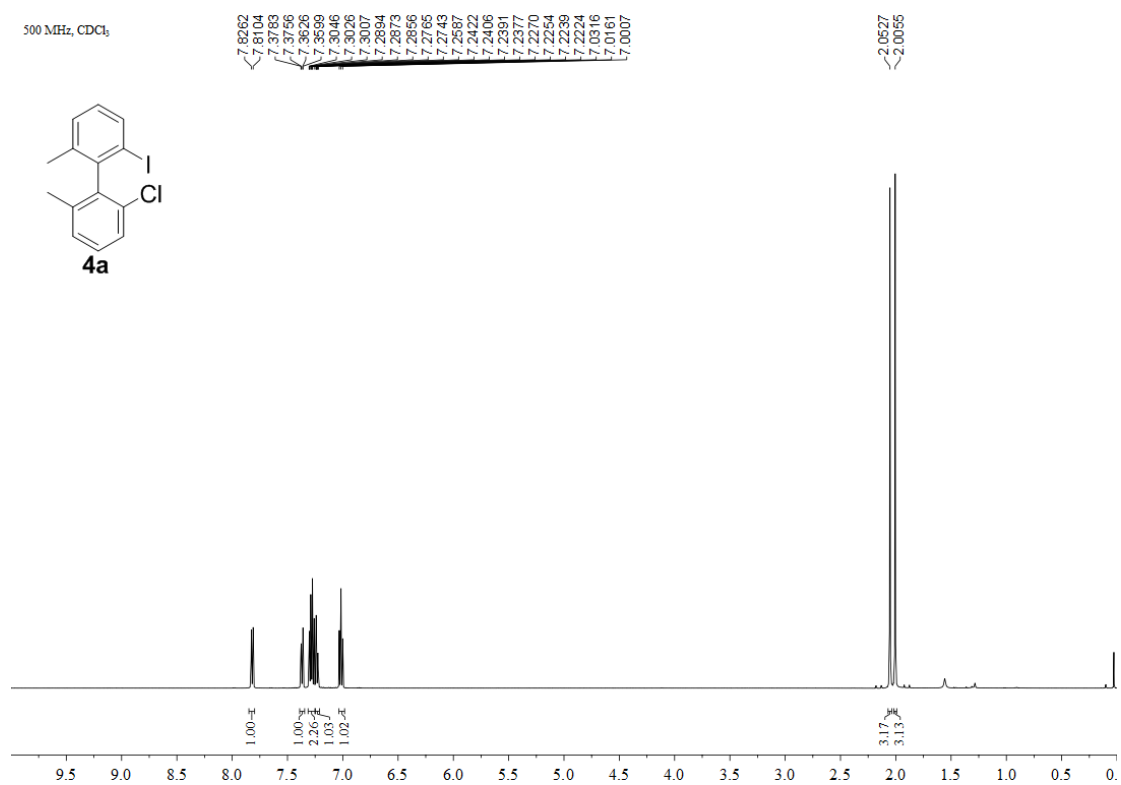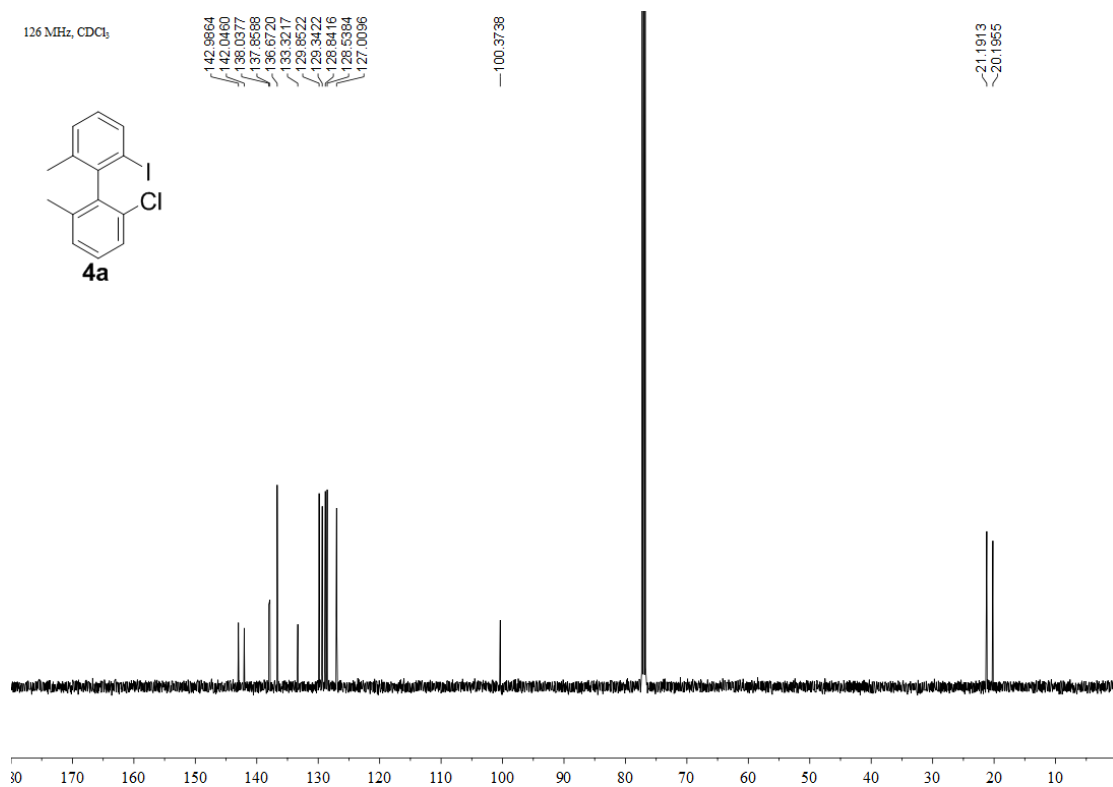

500 MHz, CDCl<sub>3</sub>

7.7112  
7.6951  
7.2662  
7.2500  
7.1608  
7.1445  
6.9298  
6.9138

2.3254  
2.3100  
1.9512  
1.8860

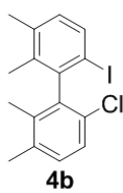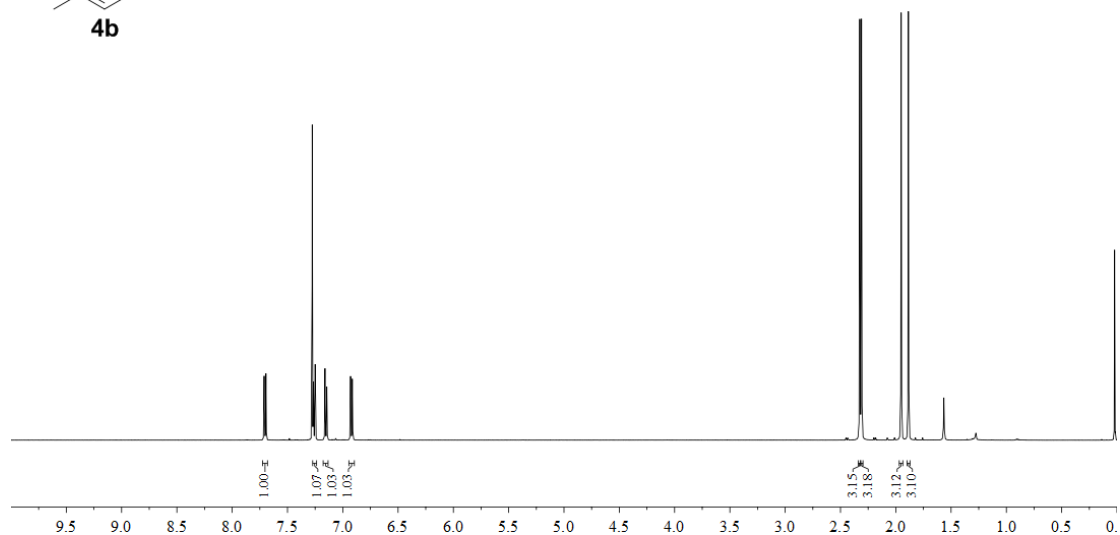

126 MHz, CDCl<sub>3</sub>

143.2930  
142.5559  
136.9658  
136.8036  
136.5069  
135.9933  
135.5377  
130.8102  
130.1524  
126.3644

97.2497

20.3177  
20.2898  
17.6522  
16.7378

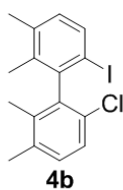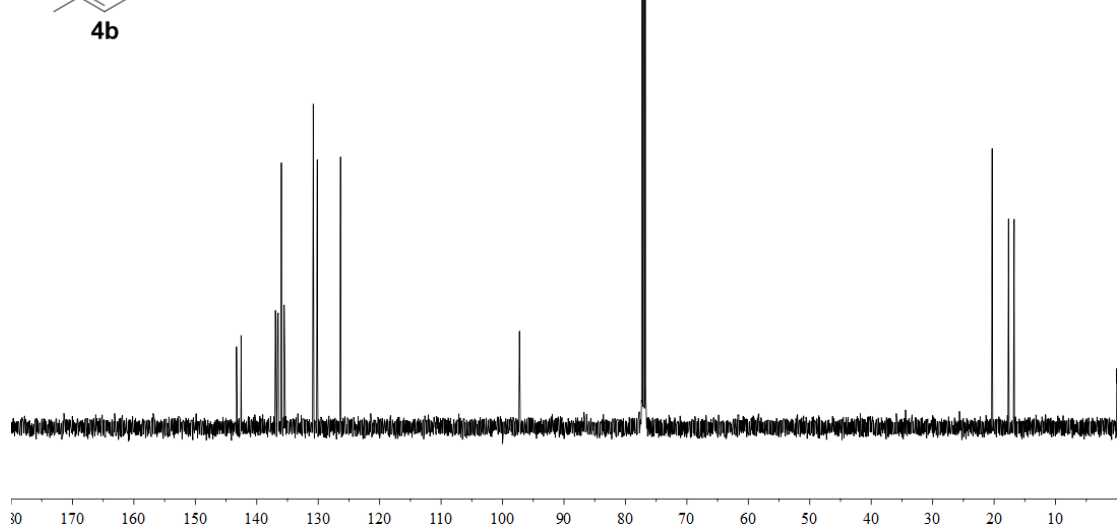

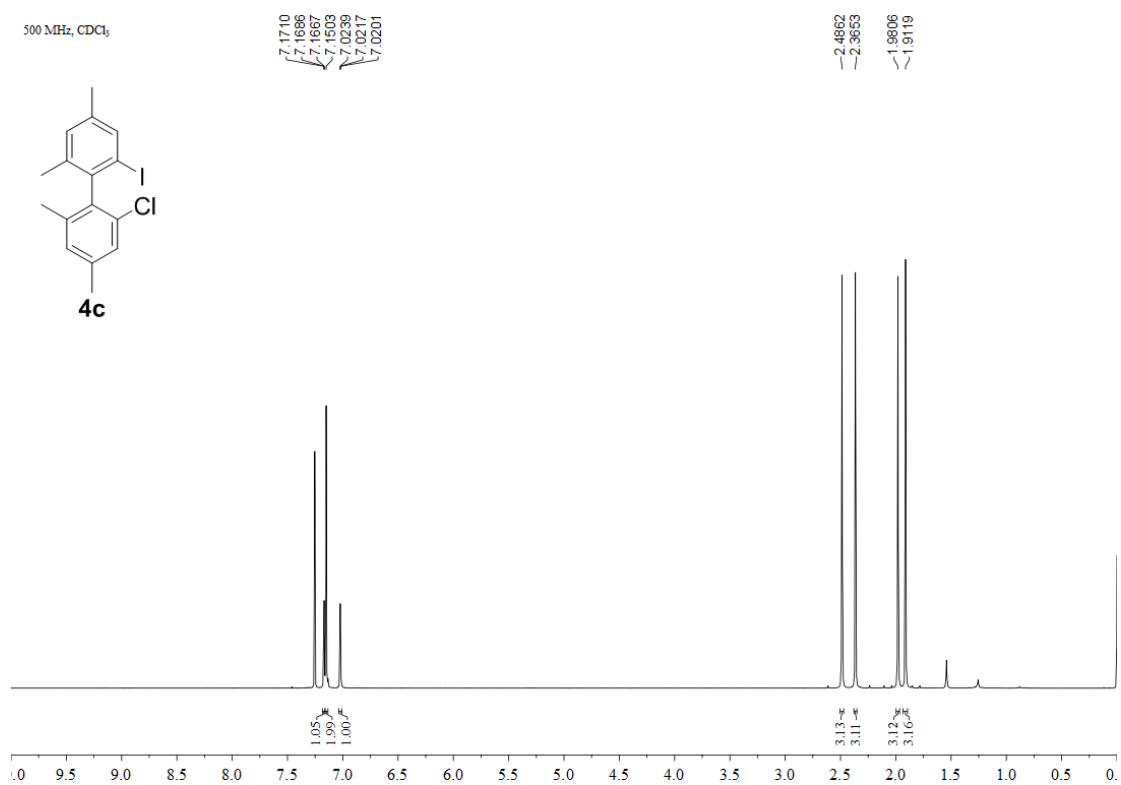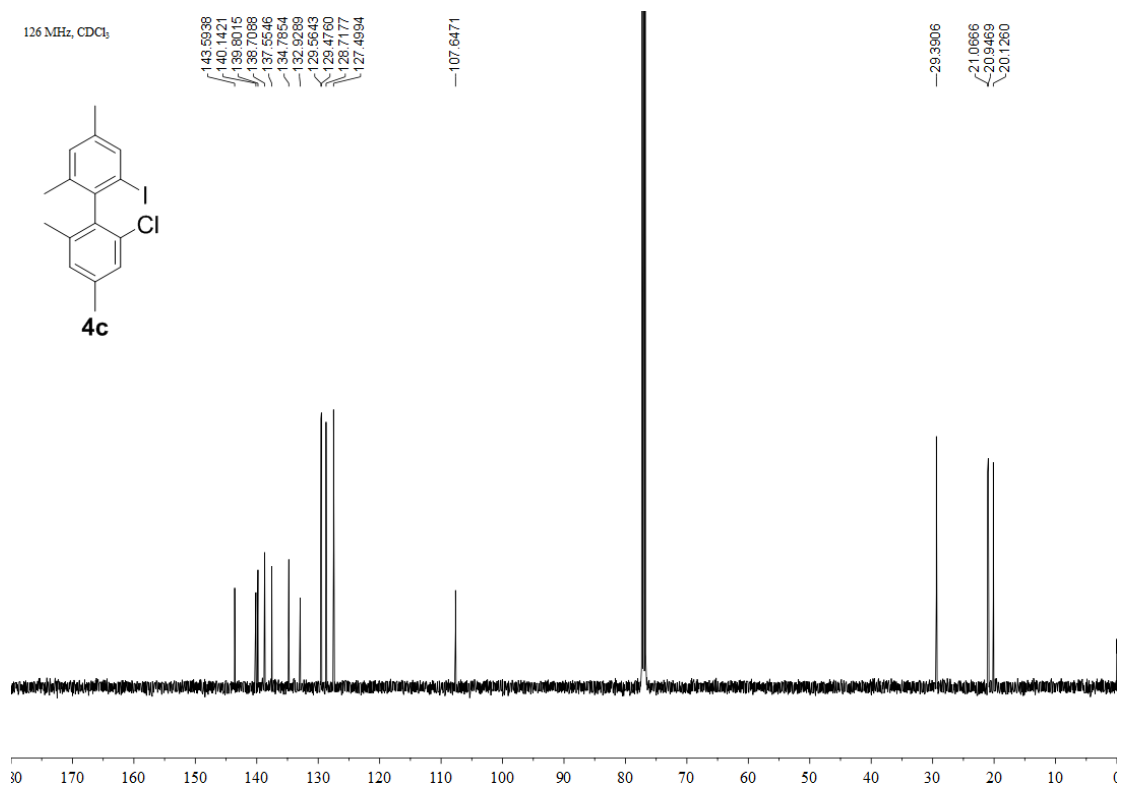

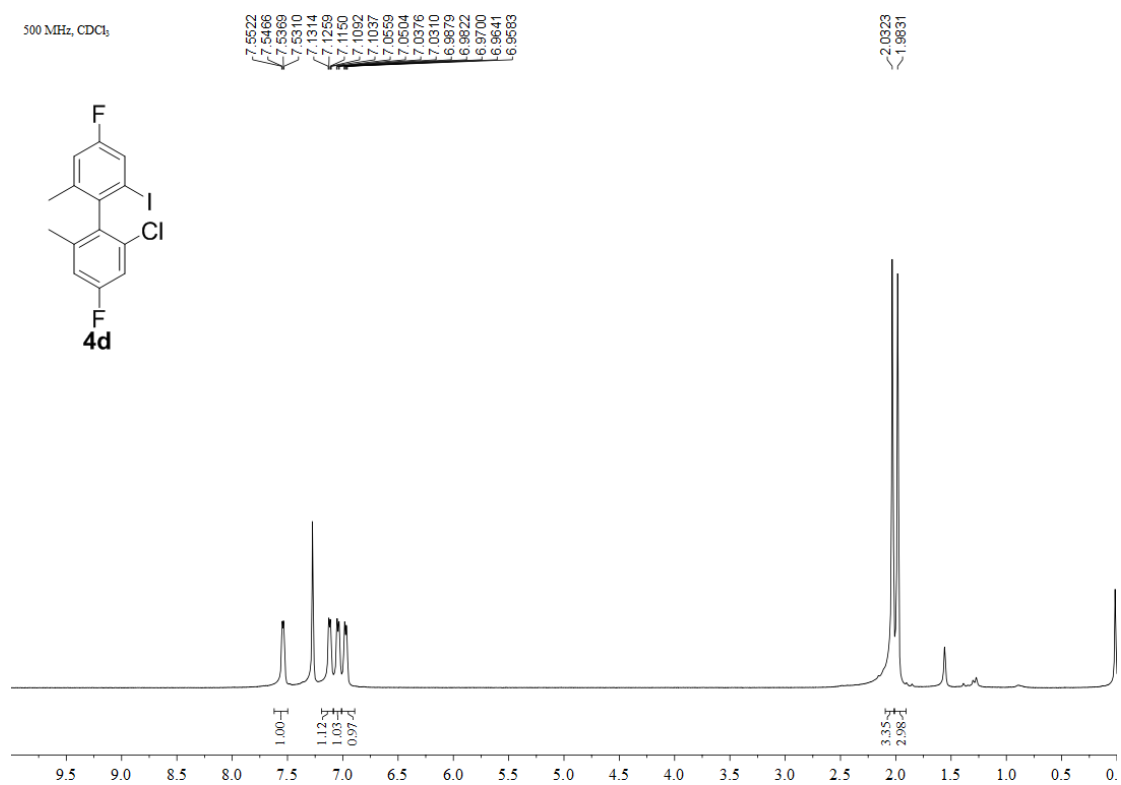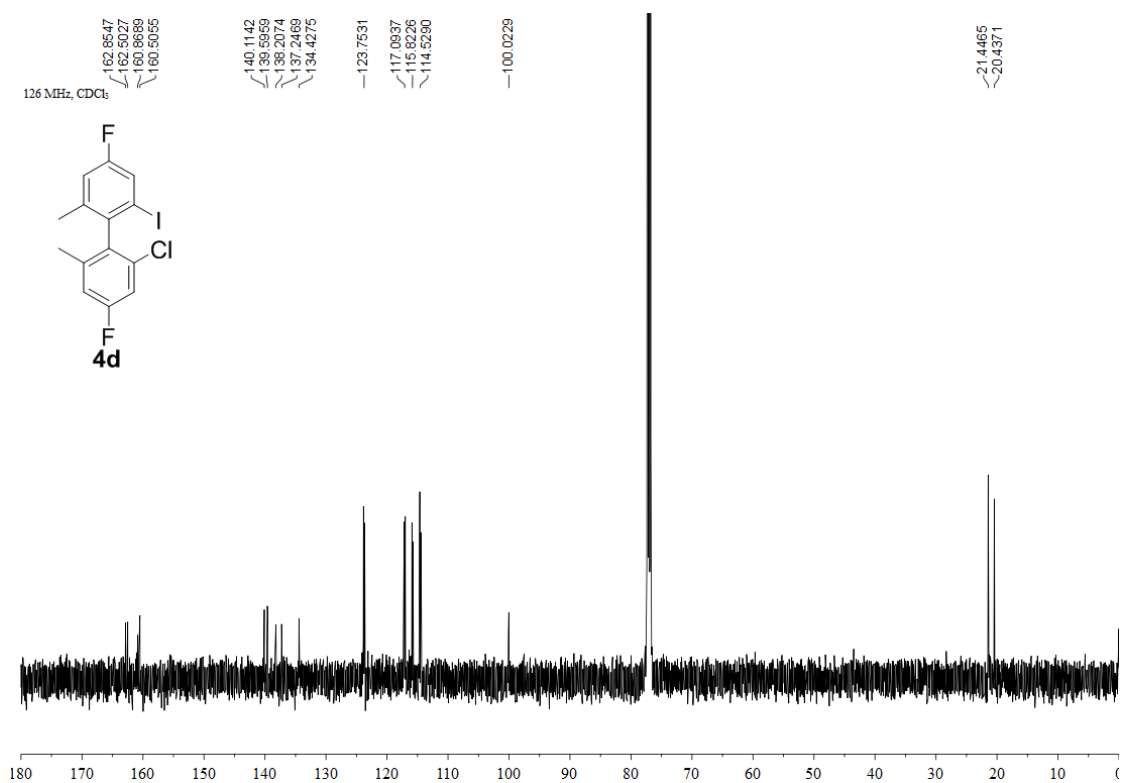



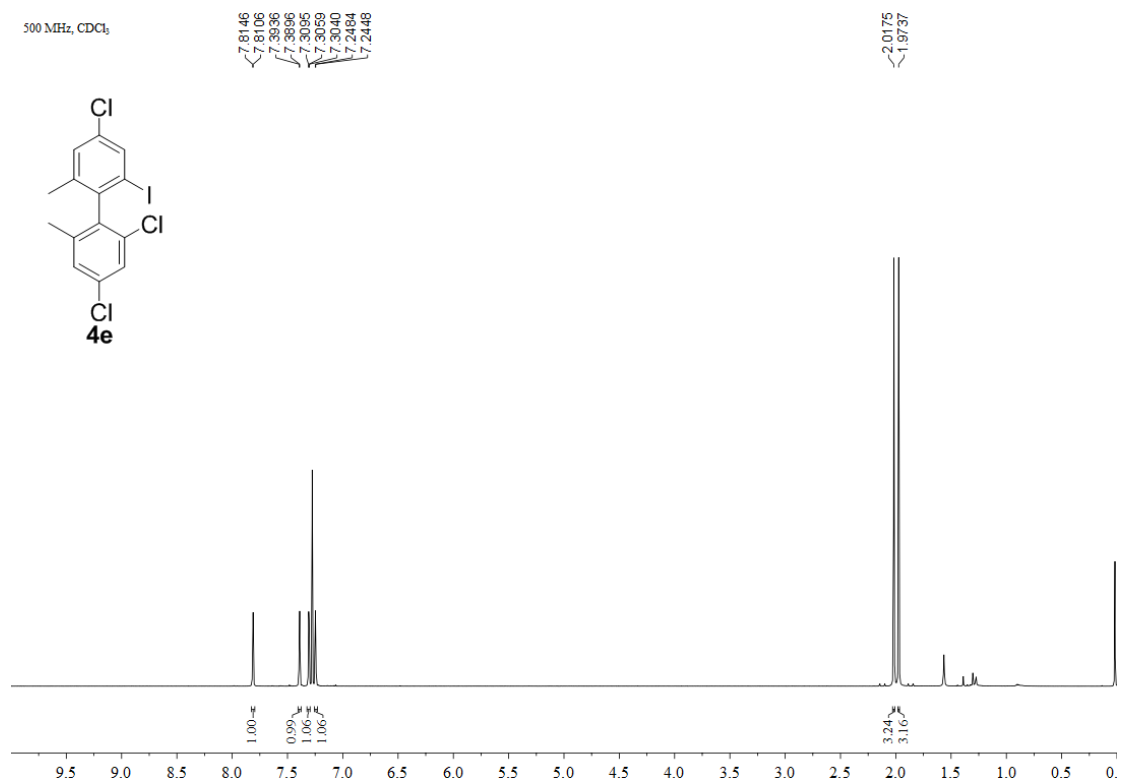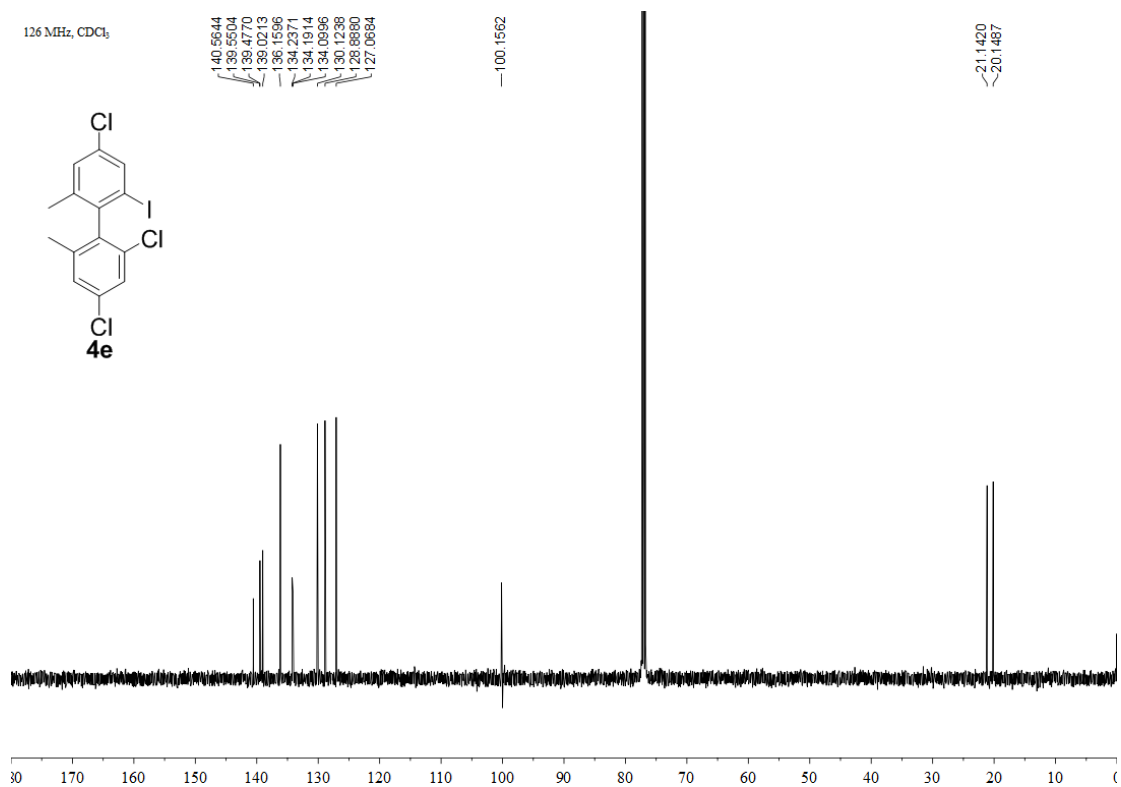

500 MHz, CDCl<sub>3</sub>

7.8899  
7.8877  
7.8840  
7.8818  
7.5348  
7.5327  
7.5188  
7.5165  
7.4719  
7.4564  
7.3867  
7.3517  
7.3494  
7.3344  
7.0522  
7.0523  
7.0732

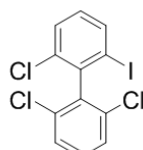

**4f**

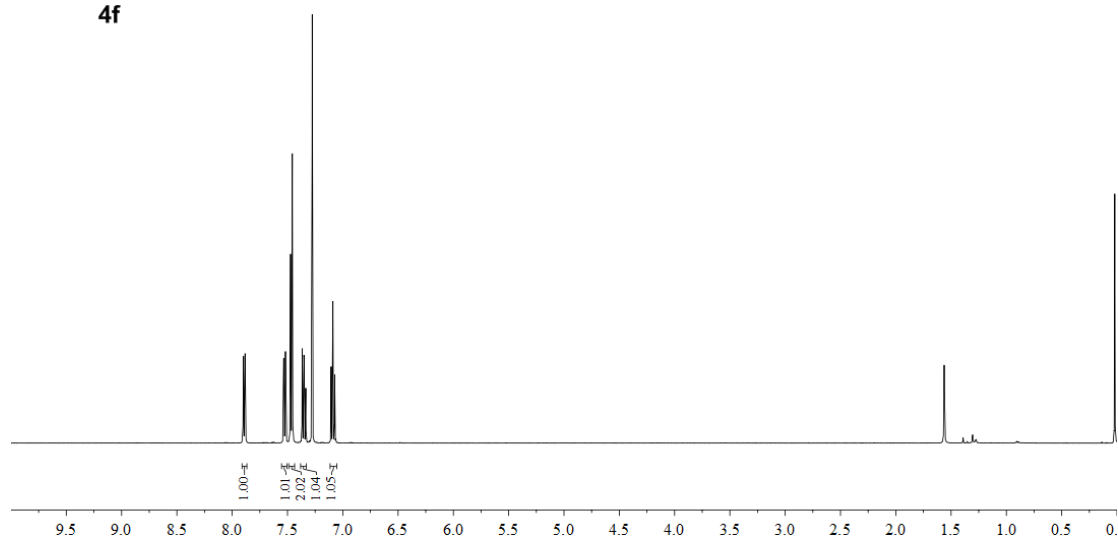

126 MHz, CDCl<sub>3</sub>

140.6745  
140.0000  
137.5450  
134.9071  
133.6952  
130.8378  
130.2482  
129.3759  
128.0421  
-99.9103

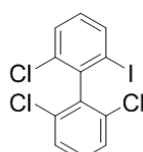

**4f**

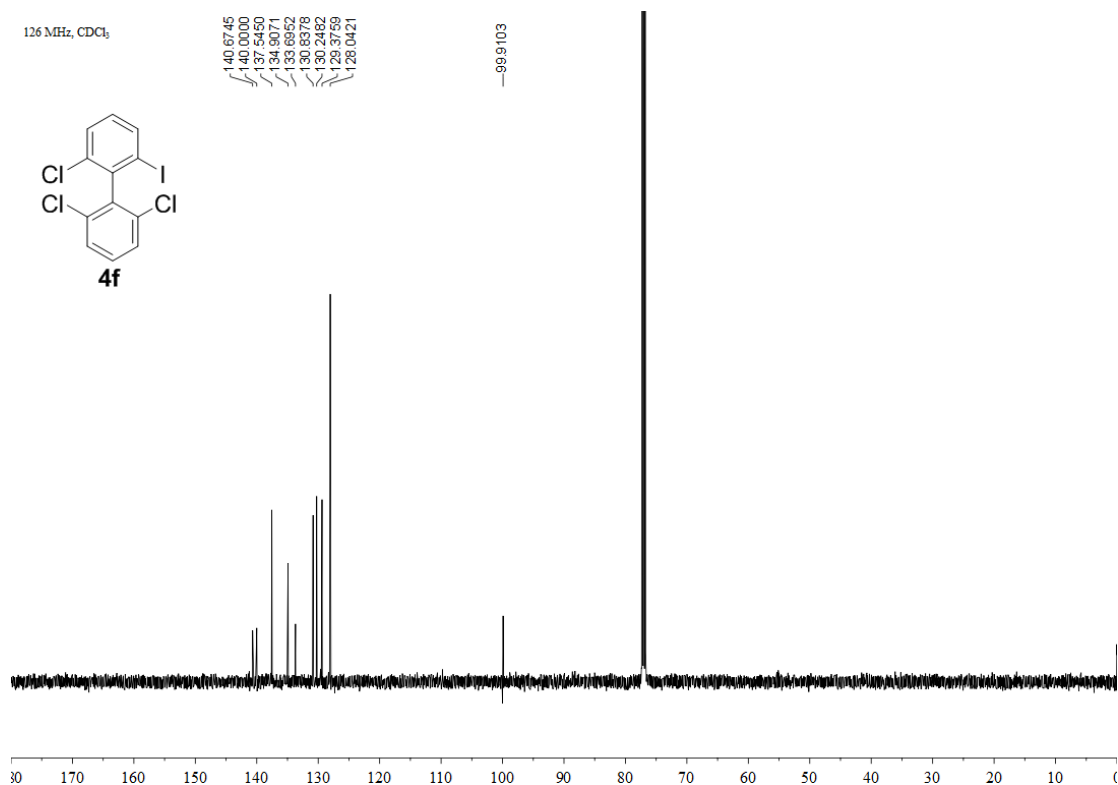

## 7. Copies of HPLC traces

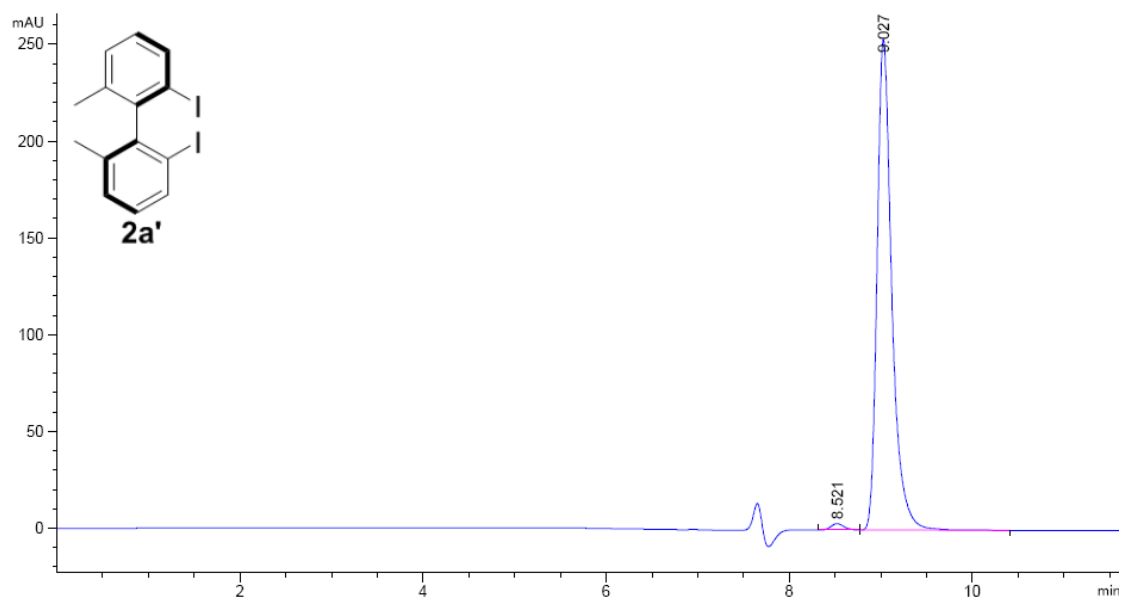

| 峰 # | 保留时间 [min] | 类型 | 峰宽 [min] | 峰面积 [mAU*s] | 峰高 [mAU]  | 峰面积 %   |
|-----|------------|----|----------|-------------|-----------|---------|
| 1   | 8.521      | BB | 0.1507   | 32.22519    | 3.30797   | 1.1242  |
| 2   | 9.027      | BB | 0.1684   | 2834.33887  | 253.52258 | 98.8758 |

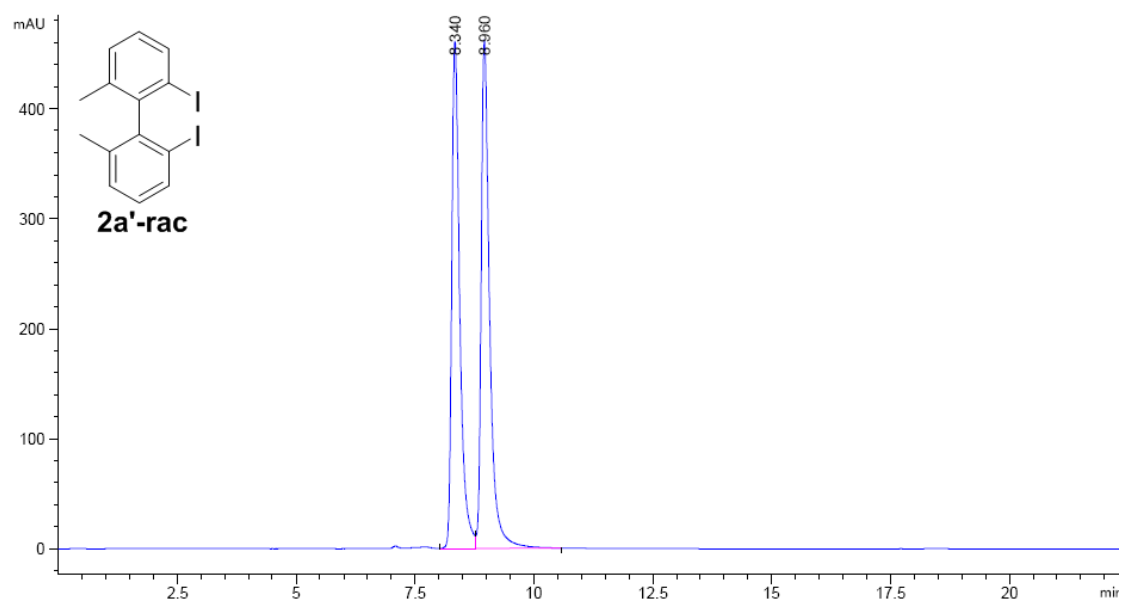

| 峰 # | 保留时间 [min] | 类型 | 峰宽 [min] | 峰面积 [mAU*s] | 峰高 [mAU]  | 峰面积 %   |
|-----|------------|----|----------|-------------|-----------|---------|
| 1   | 8.340      | BV | 0.1757   | 5402.46143  | 461.12976 | 48.6453 |
| 2   | 8.960      | VB | 0.1854   | 5703.36572  | 460.92227 | 51.3547 |

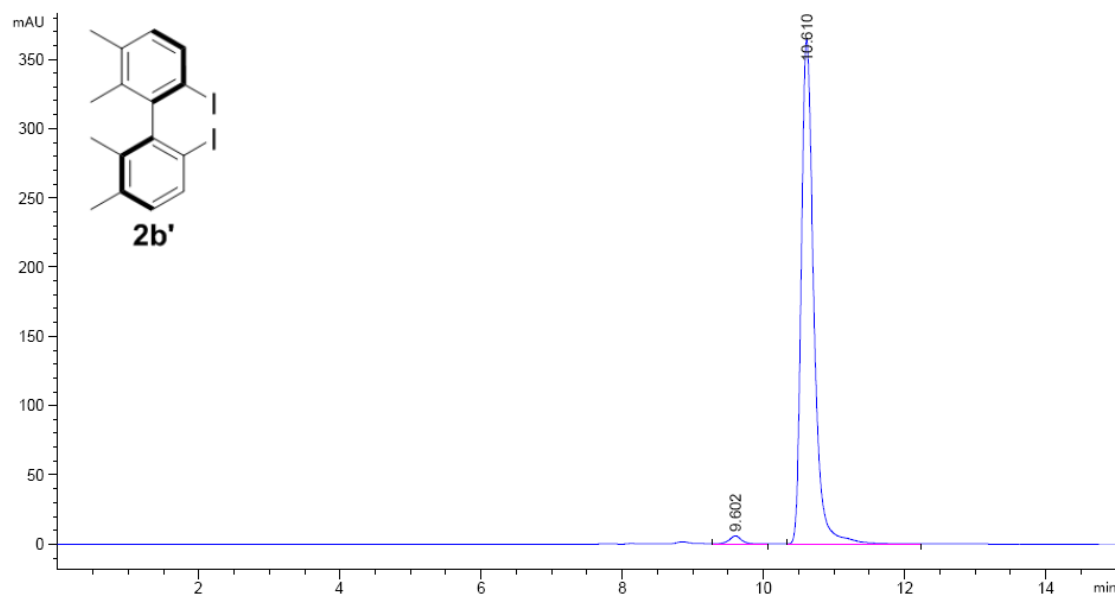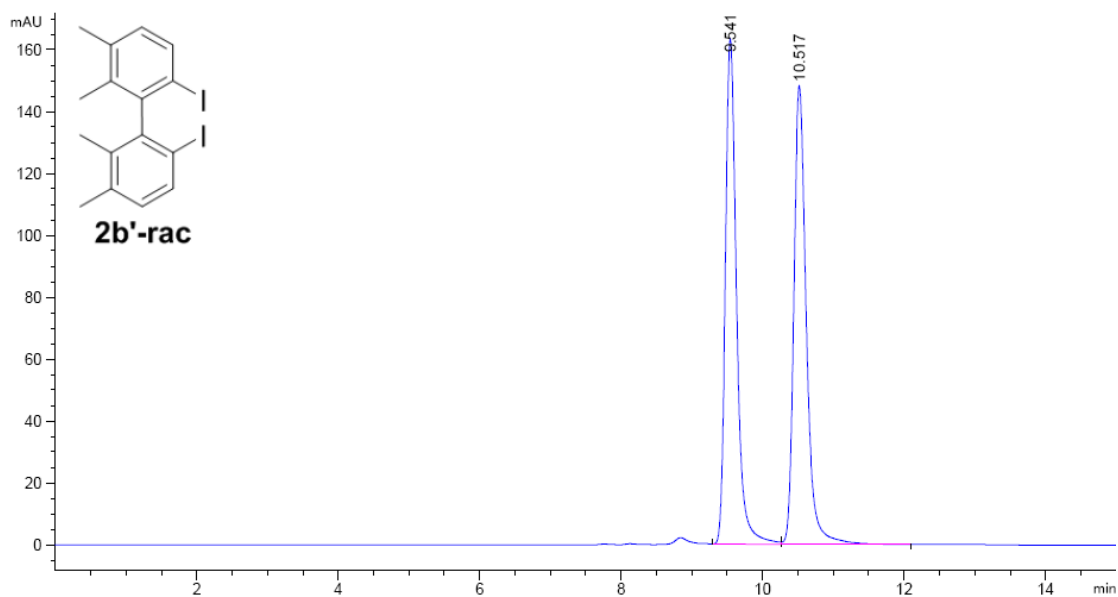

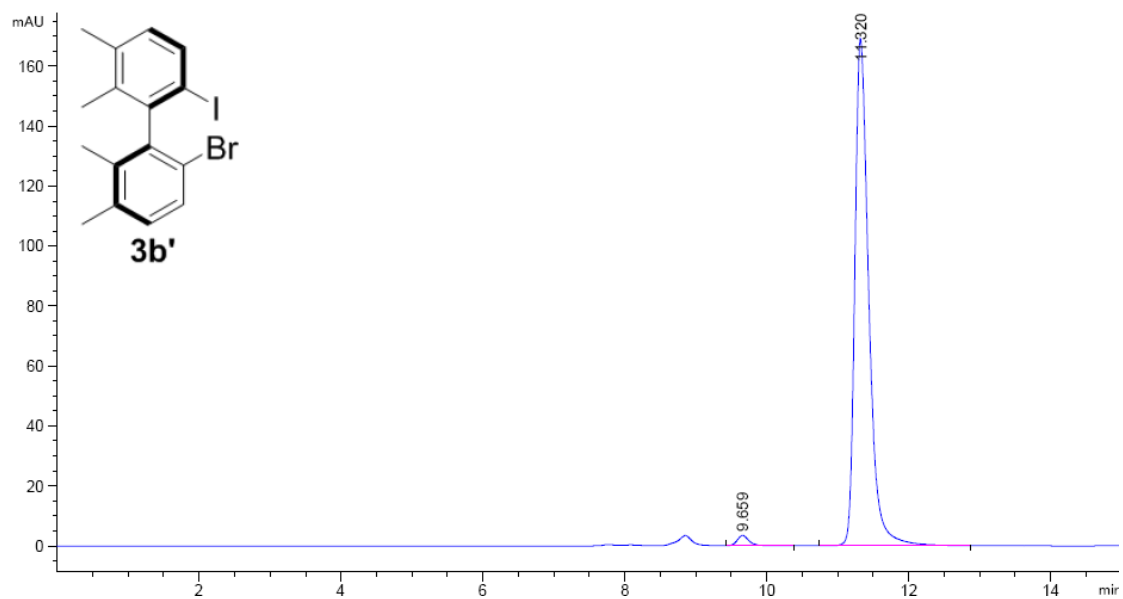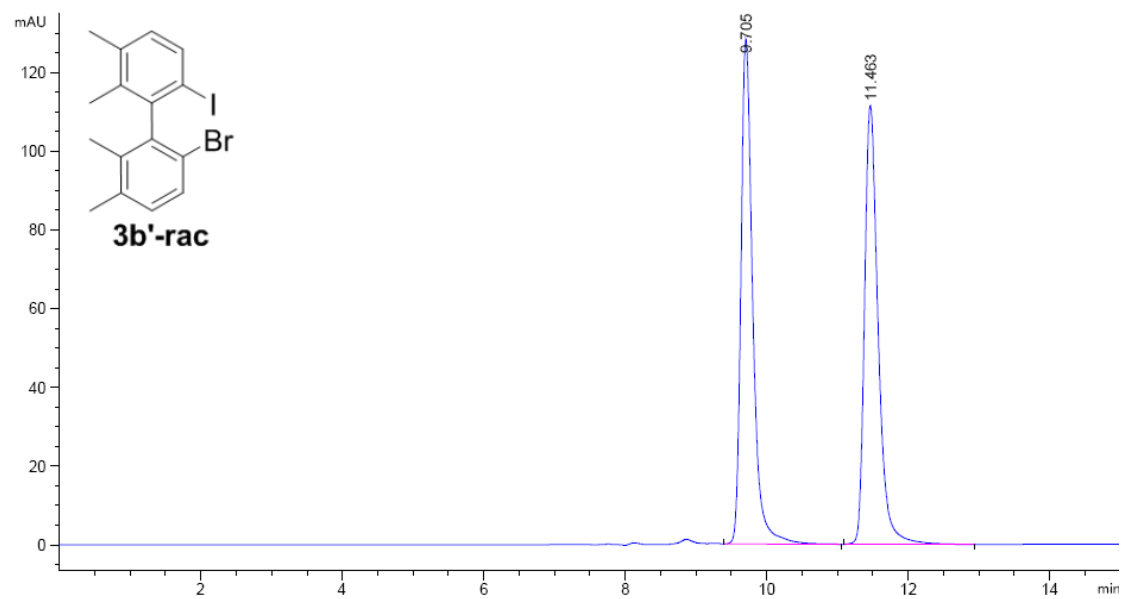

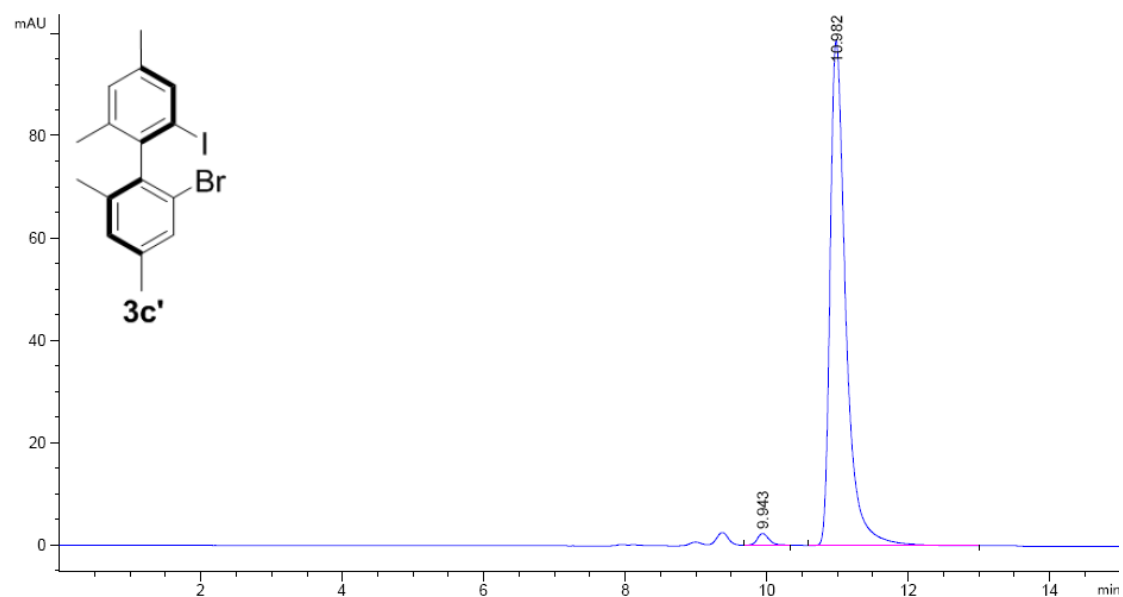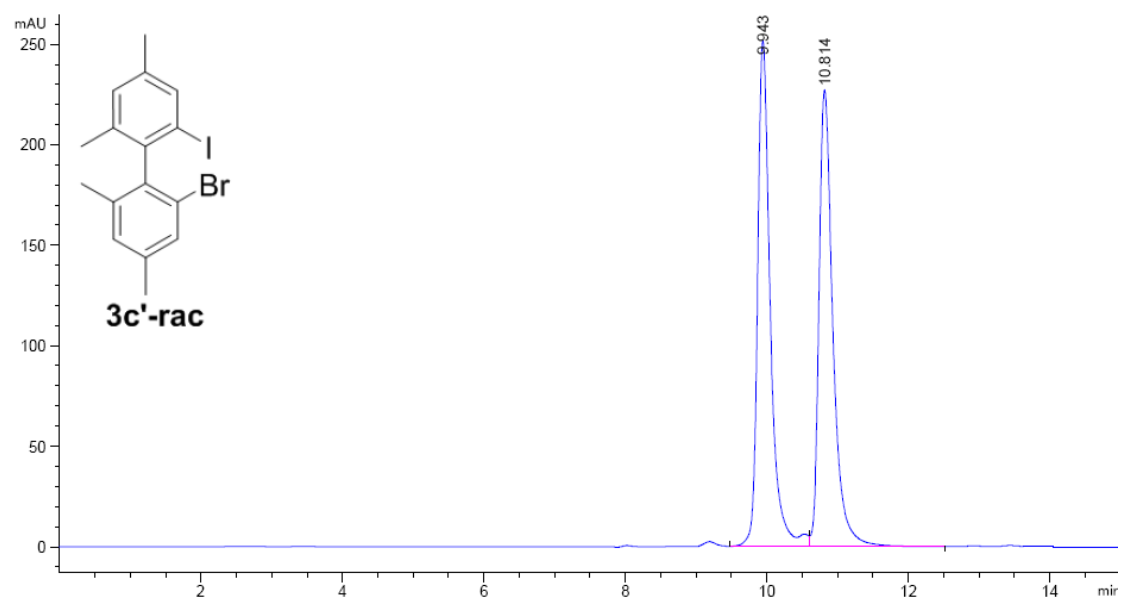

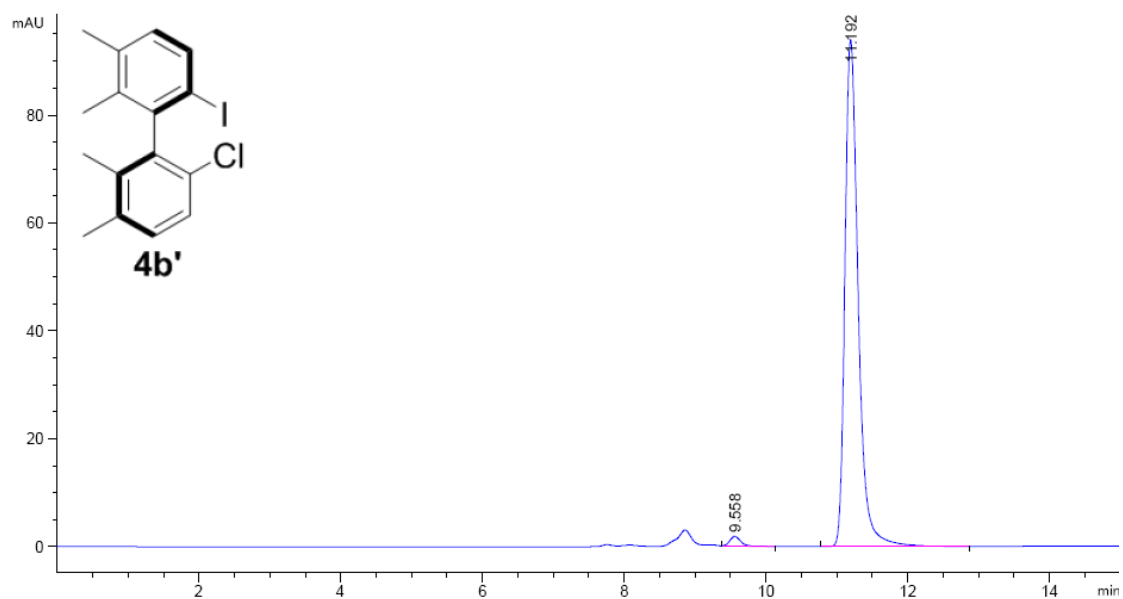

| 峰 # | 保留时间 [min] | 类型 | 峰宽 [min] | 峰面积 [mAU*s] | 峰高 [mAU] | 峰面积 %   |
|-----|------------|----|----------|-------------|----------|---------|
| 1   | 9.558      | BB | 0.1629   | 18.72320    | 1.76256  | 1.5128  |
| 2   | 11.192     | BB | 0.1974   | 1218.89856  | 93.93652 | 98.4872 |

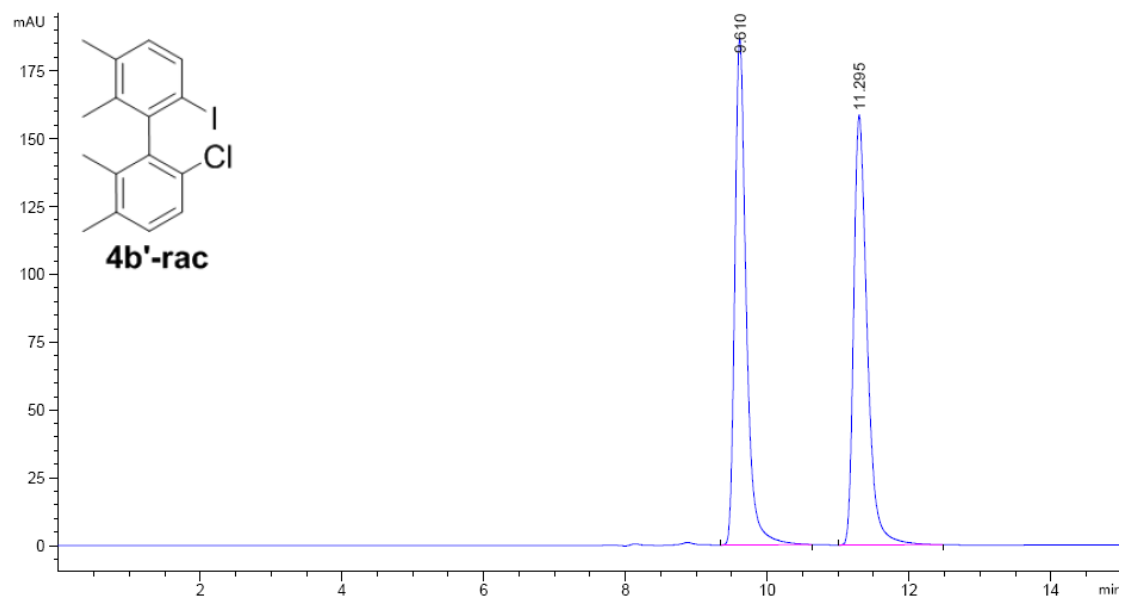

| 峰 # | 保留时间 [min] | 类型 | 峰宽 [min] | 峰面积 [mAU*s] | 峰高 [mAU]  | 峰面积 %   |
|-----|------------|----|----------|-------------|-----------|---------|
| 1   | 9.610      | VB | 0.1698   | 2092.04590  | 186.60672 | 49.9456 |
| 2   | 11.295     | BB | 0.2012   | 2096.60132  | 158.67679 | 50.0544 |

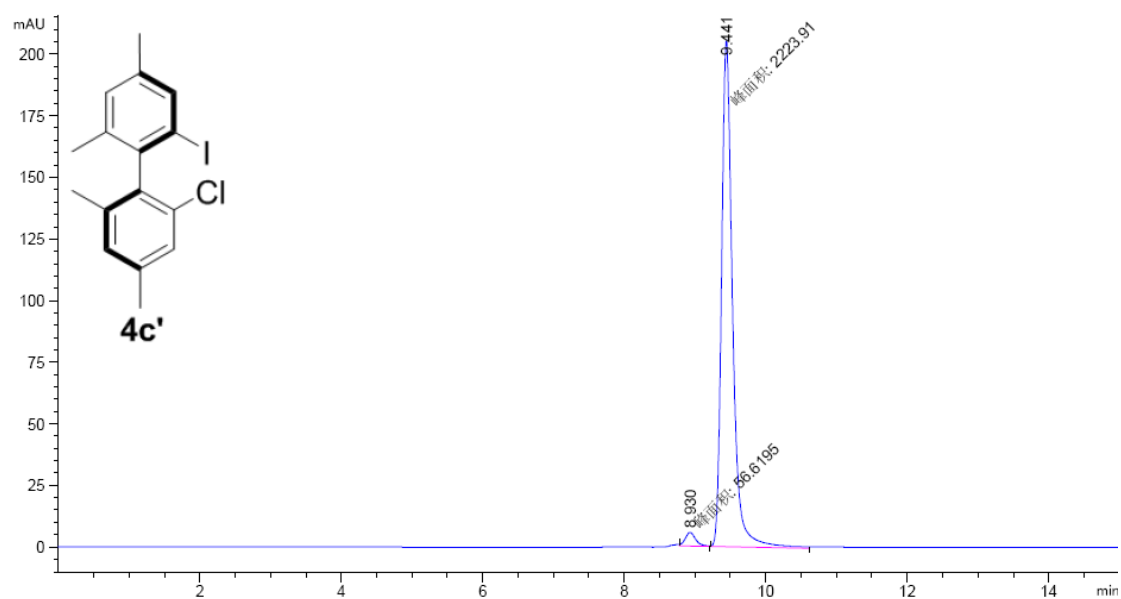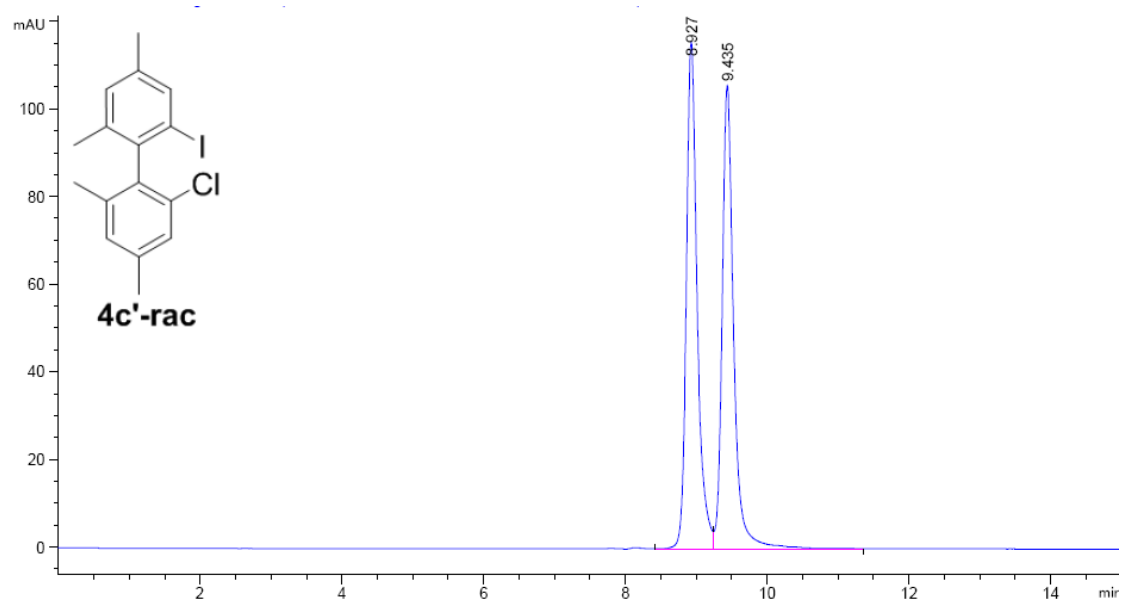

Supplement: Supplementary file 1 [file 25547881]
